# Supplementary material for: Vibrational properties of heme-nitrosoalkane complexes in comparison with those of their HNO analogs, and reactivity studies towards nitric oxide and Lewis acids
Source: Royal Society of Chemistry journal article supplement (doi:10.1039/d4dt01632g), 2024-01-01
Supplement: d4dt01632g1.pdf [file d4dt01632g1.pdf]

# Vibrational Properties of Heme-Nitrosoalkane Complexes in Comparison to their HNO Analogs, and Reactivity Studies towards Nitric Oxide and Lewis Acids

**Jill B. Harland,<sup>†</sup> Ashley B. LaLonde,<sup>†</sup> Diamond J. Thomas,<sup>†</sup> Daniel G. Castella,<sup>†</sup> Jeff W. Kampf,<sup>†</sup> Matthias Zeller,<sup>‡</sup> E. Ercan Alp,<sup>§</sup> Michael Y. Hu,<sup>§</sup> Jiyong Zhao,<sup>§</sup> and Nicolai Lehnert\*<sup>†</sup>**

<sup>†</sup> Department of Chemistry and Department of Biophysics, University of Michigan, Ann Arbor, MI 48109

<sup>‡</sup> Department of Chemistry, Purdue University, 560 Oval Drive, West Lafayette, Indiana 47907

<sup>§</sup> Advanced Photon Source, Argonne National Laboratory, Illinois 60439

## Supporting Information

## Table of Contents:

|                                                                                                                                                                                                                                                                                                        |    |
|--------------------------------------------------------------------------------------------------------------------------------------------------------------------------------------------------------------------------------------------------------------------------------------------------------|----|
| <b>Figure S1.</b> $^1\text{H-NMR}$ and $^{13}\text{C-NMR}$ spectra of nitrosobenzene .....                                                                                                                                                                                                             | 5  |
| <b>Figure S2.</b> $^1\text{H-NMR}$ and $^{13}\text{C-NMR}$ spectra of N-isopropylhydroxylamine .....                                                                                                                                                                                                   | 6  |
| <b>Figure S3.</b> $^1\text{H-NMR}$ spectrum of 2-nitrosopropane.....                                                                                                                                                                                                                                   | 7  |
| <b>Figure S4.</b> UV-vis spectra of $[\text{Fe}(\text{TPP})(\text{BF}_4)]$ and $[\text{Fe}(\text{TPP})(\text{THF})(\text{PhNO})]$ . $^1\text{H-NMR}$ spectrum of $[\text{Fe}(\text{TPP})(\text{THF})(\text{PhNO})]$ .....                                                                              | 8  |
| <b>Figure S5.</b> IR spectra of $[\text{Fe}(\text{TPP})(\text{THF})(\text{PhNO})]$ and $[\text{Fe}(\text{TPP})(\text{THF})(\text{Ph}^{15}\text{NO})]$ .....                                                                                                                                            | 9  |
| <b>Figure S6.</b> IR spectra of $[\text{Fe}(\text{TPP})(\text{THF})(\text{Ph}^{15}\text{NO})]$ with different equivalents of $\text{Ph}^{15}\text{NO}$ . IR spectra of $[\text{Fe}(\text{TPP})(\text{PhNO})_2]$ . .....                                                                                | 10 |
| <b>Figure S7.</b> IR spectra of $[\text{Fe}(\text{TPP})(\text{Pyr})(\text{PhNO})]$ and $[\text{Fe}(\text{TPP})(\text{Pyr})(\text{Ph}^{15}\text{NO})]$ .....                                                                                                                                            | 11 |
| <b>Figure S8.</b> IR spectra of $[\text{Fe}(\text{TPP})(\text{MI})(\text{PhNO})]$ and $[\text{Fe}(\text{TPP})(\text{MI})(\text{Ph}^{15}\text{NO})]$ .....                                                                                                                                              | 12 |
| <b>Figure S9.</b> $^1\text{H-NMR}$ spectrum of $[\text{Fe}(\text{TPP})(\text{THF})(\text{iPrNO})]$ .....                                                                                                                                                                                               | 13 |
| <b>Figure S10.</b> BP86/TZVP calculated NRVS VDOS for $[\text{Fe}(\text{P})(\text{NHO})]$ , $[\text{Fe}(\text{P})(\text{THF})(\text{NHO})]$ , and $[\text{Fe}(\text{P})(\text{MI})(\text{NHO})]$ .....                                                                                                 | 14 |
| <b>Figure S11.</b> UV-vis spectra of the titration of $[\text{Fe}(\text{TPP})(\text{THF})(\text{PhNO})]$ with MI.....                                                                                                                                                                                  | 15 |
| <b>Figure S12.</b> UV-vis of the reaction of $[\text{Fe}(\text{TPP})(\text{MI})(\text{PhNO})]$ with NO gas .....                                                                                                                                                                                       | 15 |
| <b>Figure S13.</b> UV-vis spectra of $[\text{Fe}(\text{TPP})(\text{THF})(\text{PhNO})]$ with MI .....                                                                                                                                                                                                  | 15 |
| <b>Figure S14.</b> UV-vis titration of $[\text{Fe}(\text{TPP})(\text{THF})(\text{iPrNO})]$ with NO. UV-vis spectra following the titration of $[\text{Fe}(\text{TPP})(\text{THF})(\text{iPrNO})]$ with MI. ....                                                                                        | 16 |
| <b>Figure S15.</b> UV-vis of $[\text{Fe}(\text{TPP})(\text{MI})(\text{iPrNO})]$ with NO .....                                                                                                                                                                                                          | 17 |
| <b>Figure S16.</b> Structural diagrams of $[\text{Fe}(\text{TPP})(\text{PhNO})(\text{PhNH}_2)]$ and $[\text{Fe}(\text{TPP})(\text{THF})(\text{PhNO})]$ ...                                                                                                                                             | 18 |
| <b>Figure S17.</b> Structural diagram for the crystal structure of $[\text{Fe}(\text{TPP})(\text{THF})(\text{iPrNO})]$ .....                                                                                                                                                                           | 19 |
| <b>Figure S18.</b> Structural diagram for the crystal structure of $[\text{Fe}(3,5\text{-Me-BAFP})(\text{THF})(\text{PhNO})]$ ...19                                                                                                                                                                    |    |
| <b>Figure S19.</b> UV-Vis spectra of $[\text{Fe}(3,5\text{-Me-BAFP})(\text{iPrNO})_2]$ with $\text{BF}_3 \cdot \text{OEt}_2$ and $\text{B}_2(\text{pin})_2$ and $[\text{Fe}(3,5\text{-Me-BAFP})]$ reacted with $\text{iPrNO}$ . IR spectrum of $[\text{Fe}(3,5\text{-Me-BAFP})(\text{iPrNO})_2]$ ..... | 20 |
| <b>Figure S20.</b> UV-Vis spectra of $[\text{Fe}(3,5\text{-Me-BAFP})(\text{iPrNO})_2]$ reacted with Lewis acids .....                                                                                                                                                                                  | 21 |
| <b>Figure S21.</b> rRaman spectra of $[\text{Fe}(3,5\text{-Me-BAFP})(\text{iPrNO})_2]$ reacted with Lewis acids.....                                                                                                                                                                                   | 22 |
| <b>Procedure S1.</b> Crystal structure determination of $[\text{Fe}(\text{TPP})(\text{THF})(\text{iPrNO})]$ .....                                                                                                                                                                                      | 23 |
| <b>Procedure S2.</b> Crystal structure determination for $[\text{Fe}(\text{TPP})(\text{THF})(\text{PhNO})]/[\text{Fe}(\text{TPP})(\text{PhNO})(\text{PhNH}_2)]$ .....                                                                                                                                  | 24 |

|                                                                                                                                                        |     |
|--------------------------------------------------------------------------------------------------------------------------------------------------------|-----|
| <b>Procedure S3.</b> Crystal Structure Determination of [Fe(3,5-Me-BAFP)(iPrNO) <sub>2</sub> ] and [Fe(3,5-Me-BAFP)(iPrNO)(iPrNH <sub>2</sub> )].      | 25  |
| <b>Procedure S4.</b> Crystal Structure Determination of [Fe(3,5-Me-BAFP)(THF)(PhNO)].                                                                  | 27  |
| <b>Table S1.</b> Crystal data for [Fe(TPP)(THF)(PhNO)] and [Fe(TPP)(PhNH <sub>2</sub> )(PhNO)].                                                        | 28  |
| <b>Table S2.</b> Atomic coordinates and equivalent isotropic displacement parameters for [Fe(TPP)(THF)(PhNO)] and [Fe(TPP)(PhNH <sub>2</sub> )(PhNO)]. | 29  |
| <b>Table S3.</b> Bond lengths and angles for [Fe(TPP)(THF)(PhNO)] and [Fe(TPP)(PhNH <sub>2</sub> )(PhNO)].                                             | 33  |
| <b>Table S4.</b> Anisotropic displacement parameters for [Fe(TPP)(THF)(PhNO)] and [Fe(TPP)(PhNH <sub>2</sub> )(PhNO)].                                 | 49  |
| <b>Table S5.</b> Hydrogen coordinates and isotropic displacement parameters for [Fe(TPP)(THF)(PhNO)] and [Fe(TPP)(PhNH <sub>2</sub> )(PhNO)].          | 53  |
| <b>Table S6.</b> Torsion angles for [Fe(TPP)(THF)(PhNO)] and [Fe(TPP)(PhNH <sub>2</sub> )(PhNO)].                                                      | 56  |
| <b>Table S7.</b> Crystal data for [Fe(TPP)(THF)(PhNO)] and [Fe(TPP)(PhNH <sub>2</sub> )(PhNO)].                                                        | 63  |
| <b>Table S8.</b> Atomic coordinates and equivalent isotropic displacement parameters for [Fe(TPP)(THF)(iPrNO)].                                        | 64  |
| <b>Table S9.</b> Bond lengths and angles for [Fe(TPP)(THF)(iPrNO)].                                                                                    | 66  |
| <b>Table S10.</b> Anisotropic displacement parameters for [Fe(TPP)(THF)(iPrNO)].                                                                       | 73  |
| <b>Table S11.</b> Hydrogen coordinates and isotropic displacement parameters for [Fe(TPP)(THF)(iPrNO)].                                                | 75  |
| <b>Table S12.</b> Torsion angles for [Fe(TPP)(THF)(iPrNO)].                                                                                            | 77  |
| <b>Table S13.</b> Crystal data and structure refinement for [Fe(3,5-Me-BAFP)(iPrNO) <sub>2</sub> ].                                                    | 82  |
| <b>Table S14.</b> Atomic coordinates and $U_{eq}$ for [Fe(3,5-Me-BAFP)(iPrNO) <sub>2</sub> ].                                                          | 83  |
| <b>Table S15.</b> Anisotropic displacement parameters for [Fe(3,5-Me-BAFP)(iPrNO) <sub>2</sub> ].                                                      | 86  |
| <b>Table S16.</b> Bond lengths and angles for [Fe(3,5-Me-BAFP)(iPrNO) <sub>2</sub> ].                                                                  | 88  |
| <b>Table S17.</b> Crystal data for the second crystal of [Fe(3,5-Me-BAFP)(iPrNO) <sub>2</sub> ].                                                       | 98  |
| <b>Table S18.</b> Atomic coordinates and $U_{eq}$ for the second crystal structure of [Fe(3,5-Me-BAFP)(iPrNO) <sub>2</sub> ].                          | 99  |
| <b>Table S19.</b> Anisotropic displacement parameters for the second crystal of [Fe(3,5-Me-BAFP)(iPrNO) <sub>2</sub> ].                                | 102 |
| <b>Table S20.</b> Bond lengths and angles for second crystal of [Fe(3,5-Me-BAFP)(iPrNO) <sub>2</sub> ].                                                | 103 |

|                                                                                                           |     |
|-----------------------------------------------------------------------------------------------------------|-----|
| <b>Table S21.</b> Torsion angles for second crystal of [Fe(3,5-Me-BAFP)(iPrNO) <sub>2</sub> ]             | 109 |
| <b>Table S22.</b> Crystal data and structure refinement for [Fe(3,5-Me-BAFP)(iPrNH <sub>2</sub> )(iPrNO)] | 112 |
| <b>Table S23.</b> Atomic coordinates and $U_{eq}$ for [Fe(3,5-Me-BAFP)(iPrNH <sub>2</sub> )(iPrNO)]       | 113 |
| <b>Table S24.</b> Anisotropic displacement parameters for [Fe(3,5-Me-BAFP)(iPrNH <sub>2</sub> )(iPrNO)]   | 116 |
| <b>Table S25.</b> Bond lengths and angles for [Fe(3,5-Me-BAFP)(iPrNH <sub>2</sub> )(iPrNO)]               | 117 |
| <b>Table S26.</b> Torsion angles for [Fe(3,5-Me-BAFP)(iPrNH <sub>2</sub> )(iPrNO)]                        | 123 |
| <b>Table S27.</b> Crystal data and structure refinement for [Fe(3,5-Me-BAFP)(2-MeTHF)(PhNO)]              | 127 |
| <b>Table S28.</b> Atomic coordinates and $U_{eq}$ for [Fe(3,5-Me-BAFP)(2-MeTHF)(PhNO)]                    | 128 |
| <b>Table S29.</b> Anisotropic displacement parameters for [Fe(3,5-Me-BAFP)(2-MeTHF)(PhNO)]                | 132 |
| <b>Table S30.</b> Bond lengths and angles for [Fe(3,5-Me-BAFP)(2-MeTHF)(PhNO)]                            | 134 |
| <b>Table S31.</b> Torsion angles for [Fe(3,5-Me-BAFP)(2-MeTHF)(PhNO)]                                     | 140 |
| <b>References</b>                                                                                         | 144 |

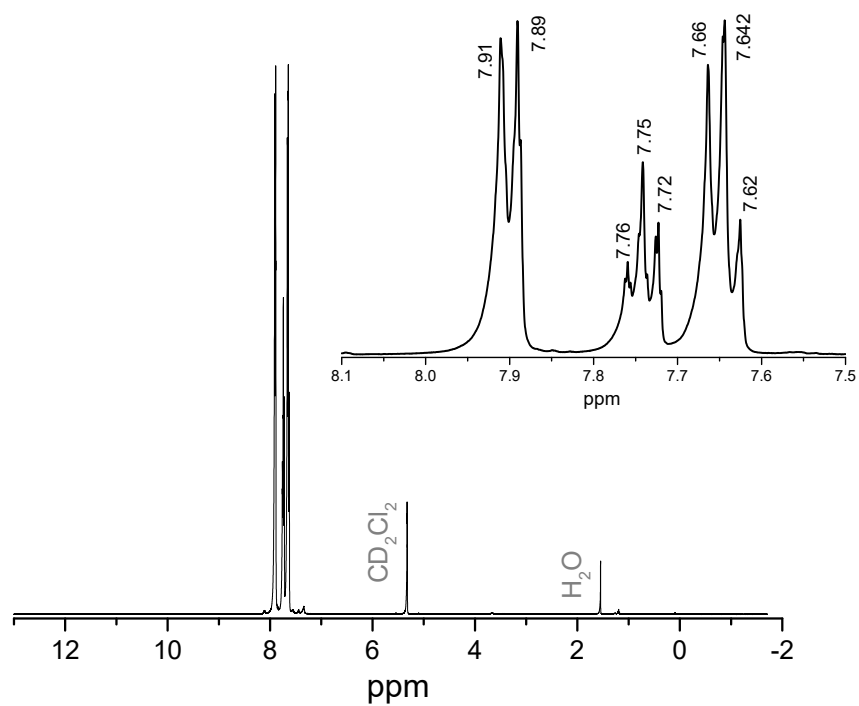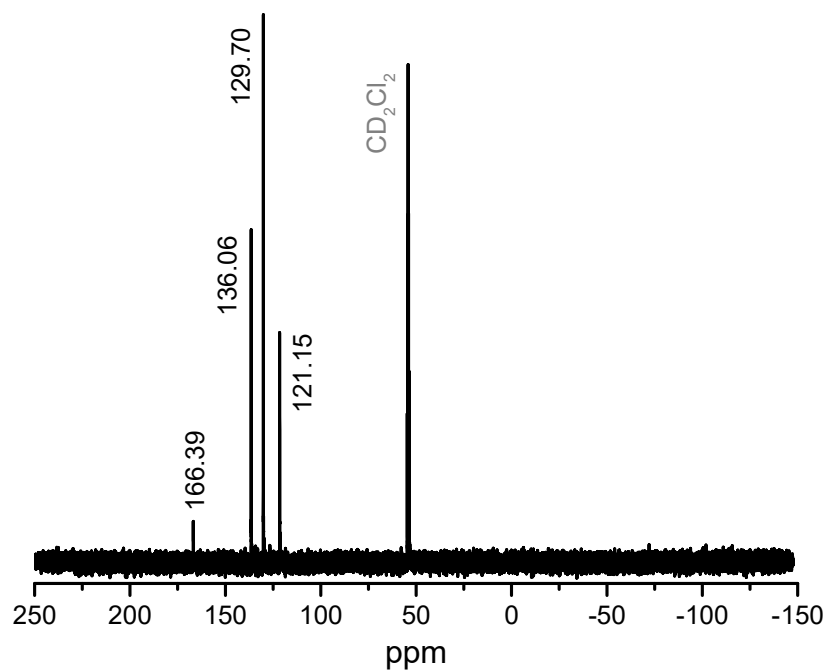

**Figure S1.** Top: <sup>1</sup>H-NMR spectrum of nitrosobenzene in CD<sub>2</sub>Cl<sub>2</sub>. Bottom: <sup>13</sup>C-NMR spectrum of nitrosobenzene recorded in CD<sub>2</sub>Cl<sub>2</sub> with the line width set to 1 Hz. All spectra were recorded at room temperature.

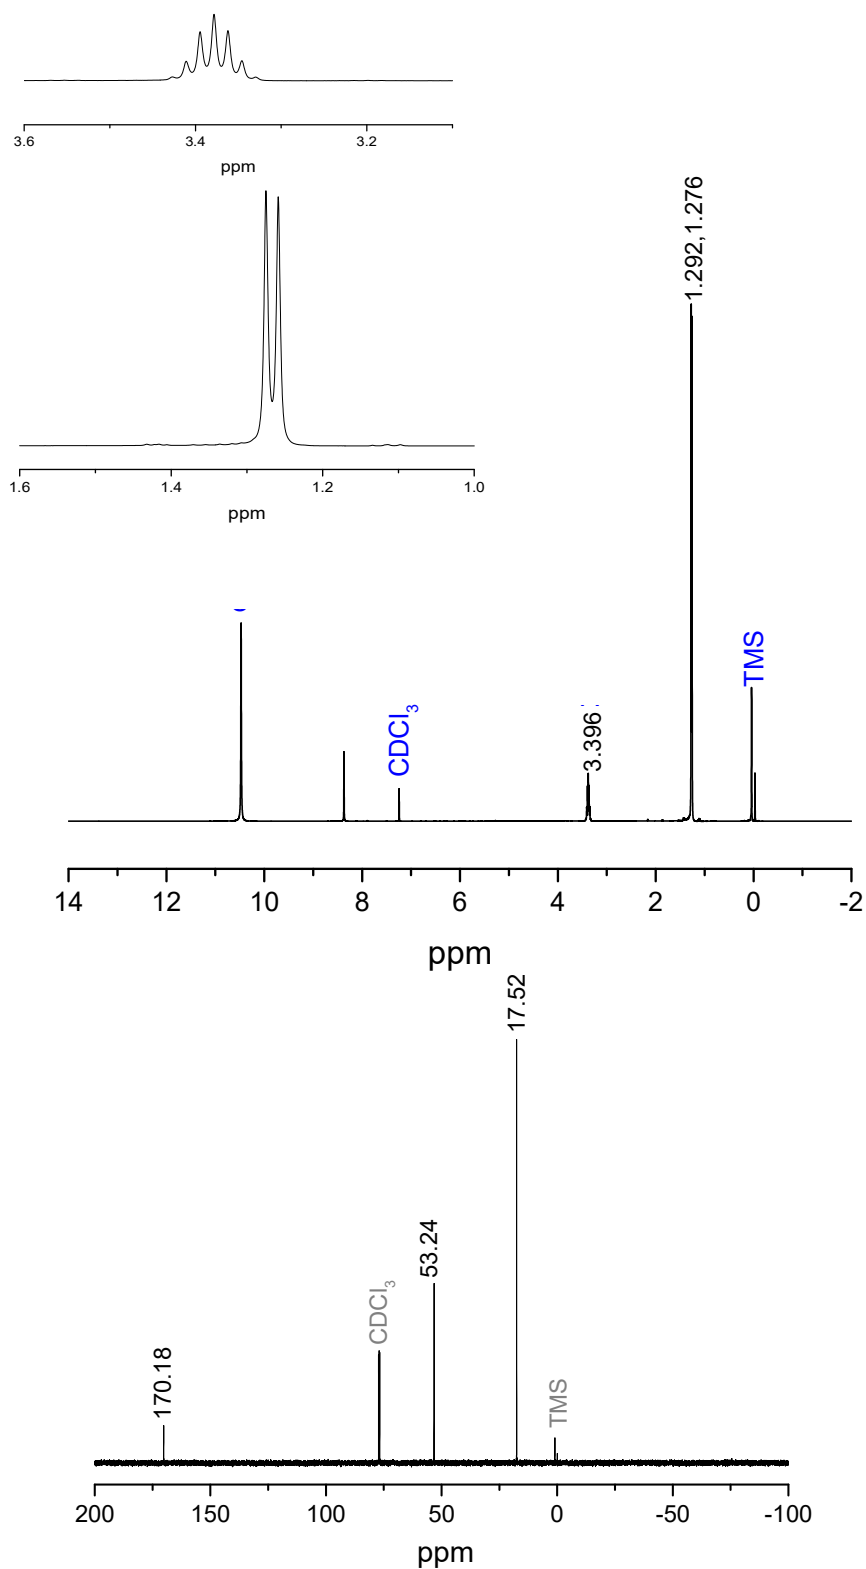

**Figure S2.** Top: <sup>1</sup>H-NMR spectrum of N-isopropylhydroxylamine (iPrNHOH) in CDCl<sub>3</sub>. Bottom: <sup>13</sup>C-NMR spectrum of iPrNHOH in CDCl<sub>3</sub>, with the line width set to 1 Hz. All spectra were recorded at room temperature.

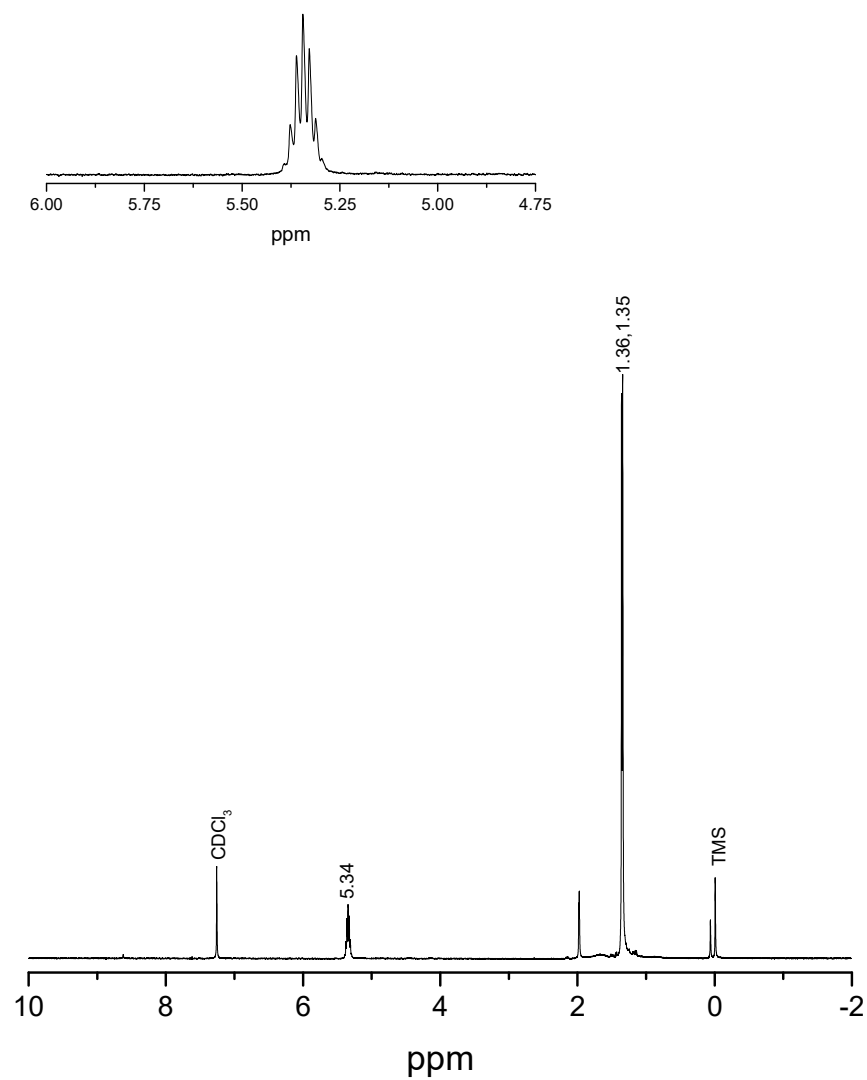

**Figure S3.**  $^1\text{H-NMR}$  spectrum of 2-nitrosopropane (iPrNO) in  $\text{CDCl}_3$  recorded at room temperature.

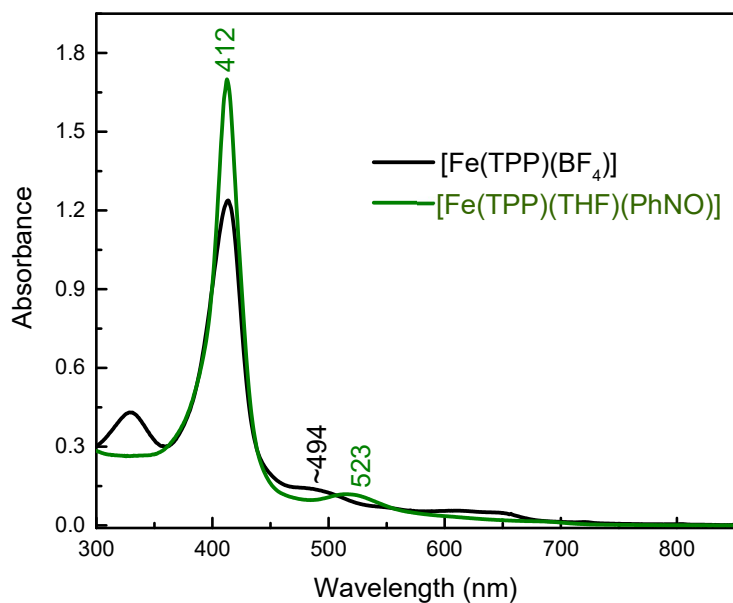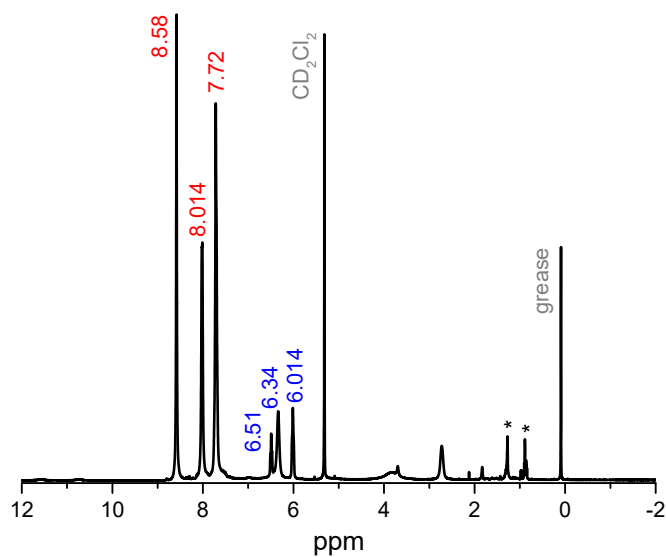

**Figure S4.** Top: UV-vis spectra of the precursor,  $[\text{Fe}(\text{TPP})(\text{BF}_4)]$  (black), and of the isolated reaction product,  $[\text{Fe}(\text{TPP})(\text{THF})(\text{PhNO})]$  (green), in dichloromethane at room temperature. Bottom:  $^1\text{H-NMR}$  spectrum of  $[\text{Fe}(\text{TPP})(\text{THF})(\text{PhNO})]$  in  $\text{CD}_2\text{Cl}_2$  with the line width is set to 0.3 Hz. The \* denotes residual hexanes from the recrystallization. All spectra were recorded at room temperature.



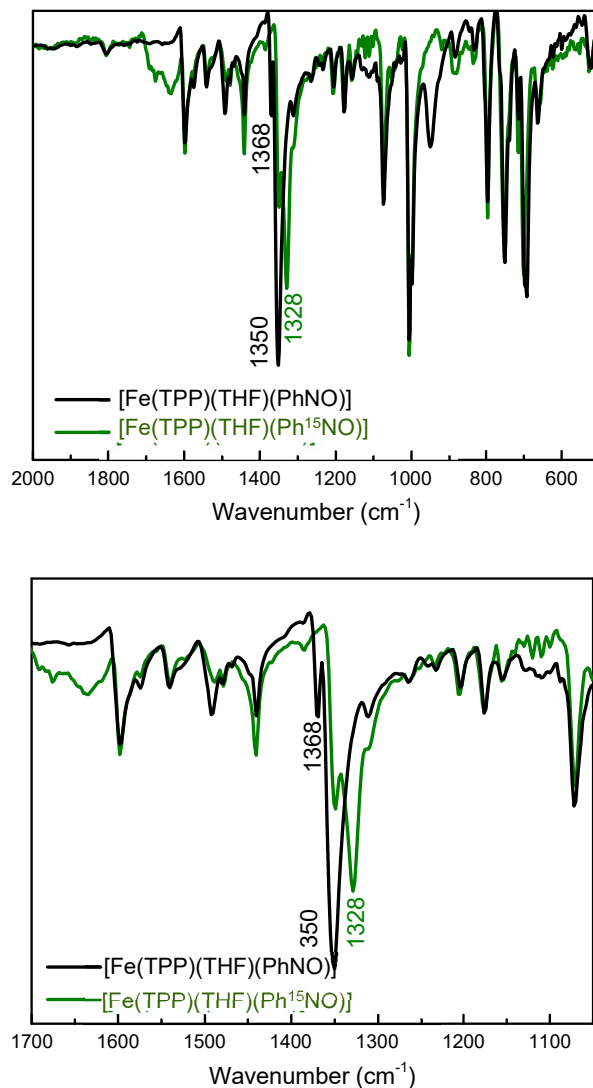

**Figure S5.** Top: Overlay of the IR spectra of [Fe(TPP)(THF)(PhNO)] (black), and of the <sup>15</sup>N-labeled complex, [Fe(TPP)(THF)(Ph<sup>15</sup>N)] (green), measured in KBr pellets. Bottom: Expanded view of the N-O stretching frequency region. The natural abundance isotopes complex [Fe(TPP)(THF)(PhNO)] shows two isotope sensitive features at 1368 and 1350 cm<sup>-1</sup>, indicative of the presence of the bis-PhNO complex (see text). The spectra were recorded at room temperature.

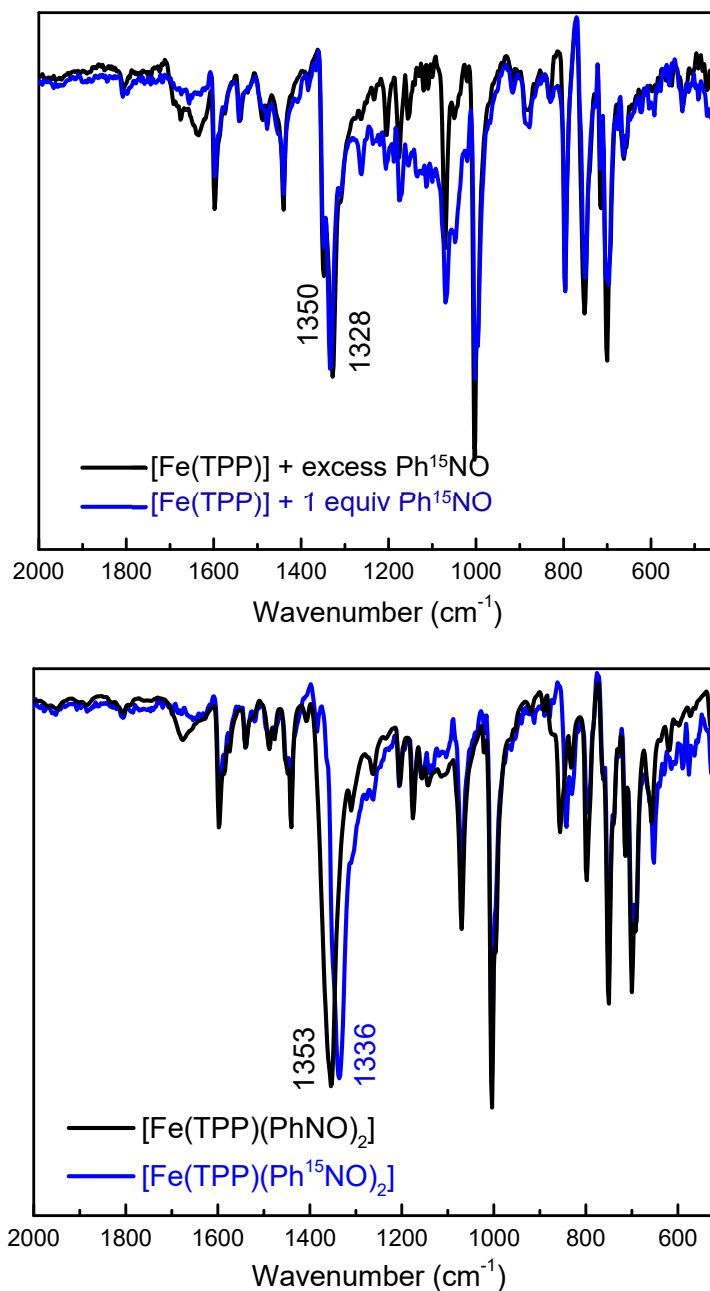

**Figure S6.** Top: Comparison of the IR spectra of the isolated product, [Fe(TPP)(THF)(Ph<sup>15</sup>NO)], prepared by reacting [Fe(TPP)] with different equivalents of Ph<sup>15</sup>NO. The N-O stretching frequency region is identical when excess Ph<sup>15</sup>NO (black) versus ~1 equiv. Ph<sup>15</sup>NO (blue) is used. Bottom: Overlay of the IR spectra of [Fe(TPP)(PhNO)<sub>2</sub>] (black) and the <sup>15</sup>N-labeled complex, [Fe(TPP)(Ph<sup>15</sup>NO)<sub>2</sub>] (blue), measured in KBr pellets. The spectra were recorded at room temperature.

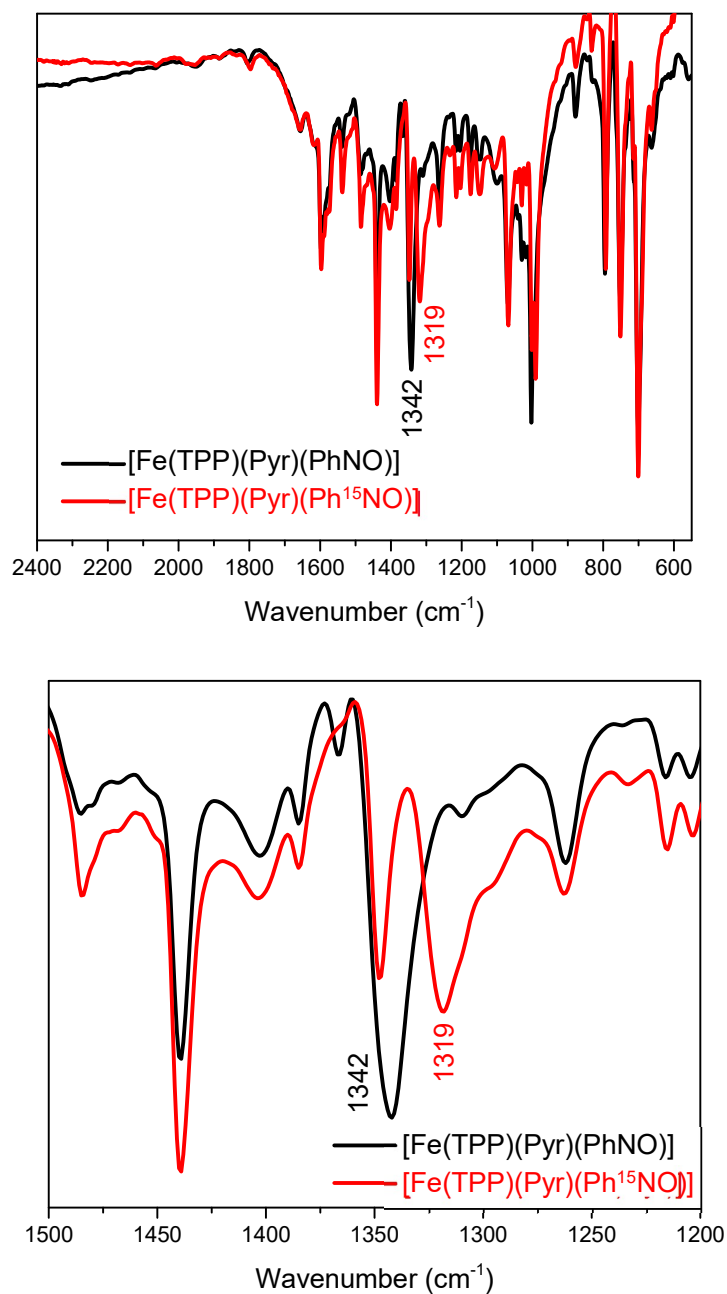

**Figure S7.** Top: Overlay of the IR spectra of [Fe(TPP)(Pyr)(PhNO)] (black), and of the <sup>15</sup>N-labeled complex, [Fe(TPP)(Pyr)(Ph<sup>15</sup>NO)] (red, Pyr = pyridine), measured in KBr pellets. Bottom: Expanded view of the N-O stretching frequency region. The natural abundance isotopes complex [Fe(TPP)(Pyr)(PhNO)] shows an isotope sensitive feature at 1342 cm<sup>-1</sup>. The spectra were recorded at room temperature.

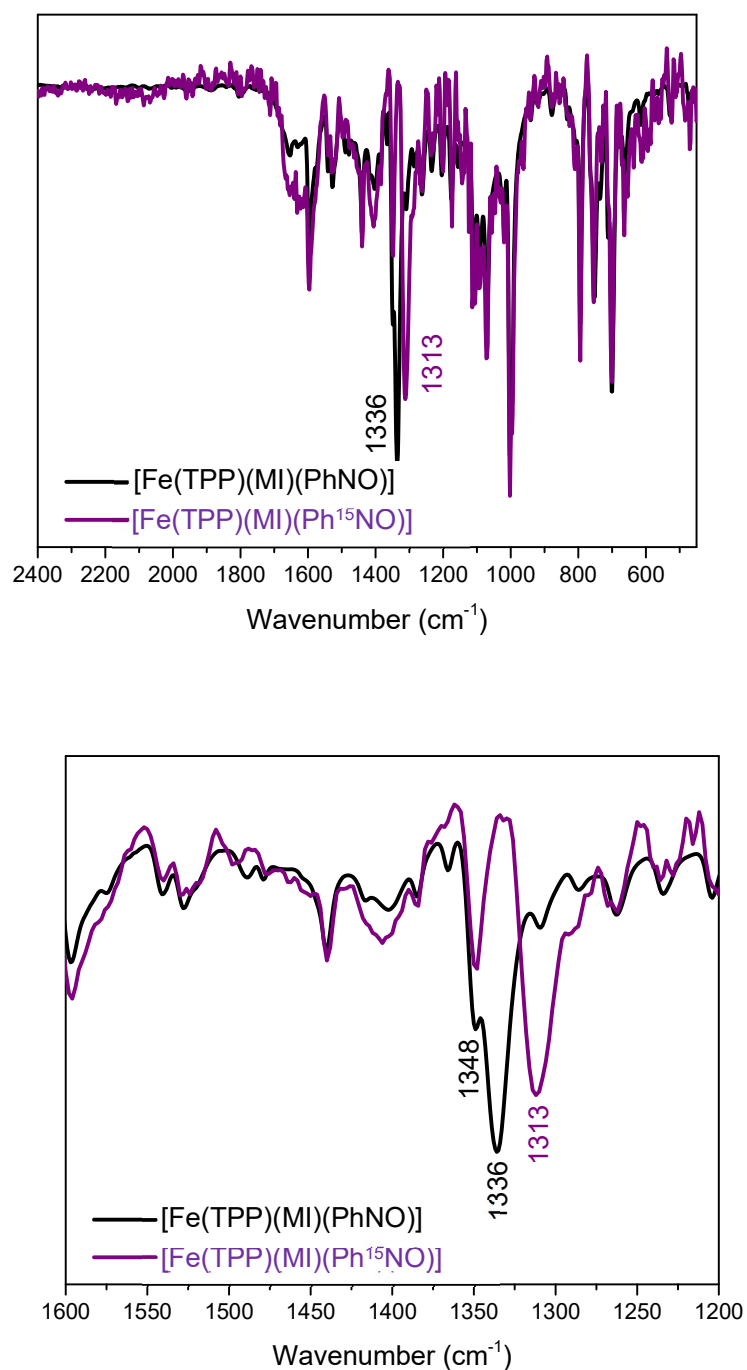

**Figure S8.** Top: Overlay of the IR spectra of [Fe(TPP)(MI)(PhNO)] (black), and of the <sup>15</sup>N-labeled complex, [Fe(TPP)(MI)(Ph<sup>15</sup>NNO)] (purple), measured in KBr pellets. Bottom: Expanded view of the N-O stretching frequency region. The natural abundance isotopes complex [Fe(TPP)(MI)(PhNO)] shows an isotope sensitive feature at 1336 cm<sup>-1</sup>. MI denotes 1-methylimidazole. The spectra were recorded at room temperature.

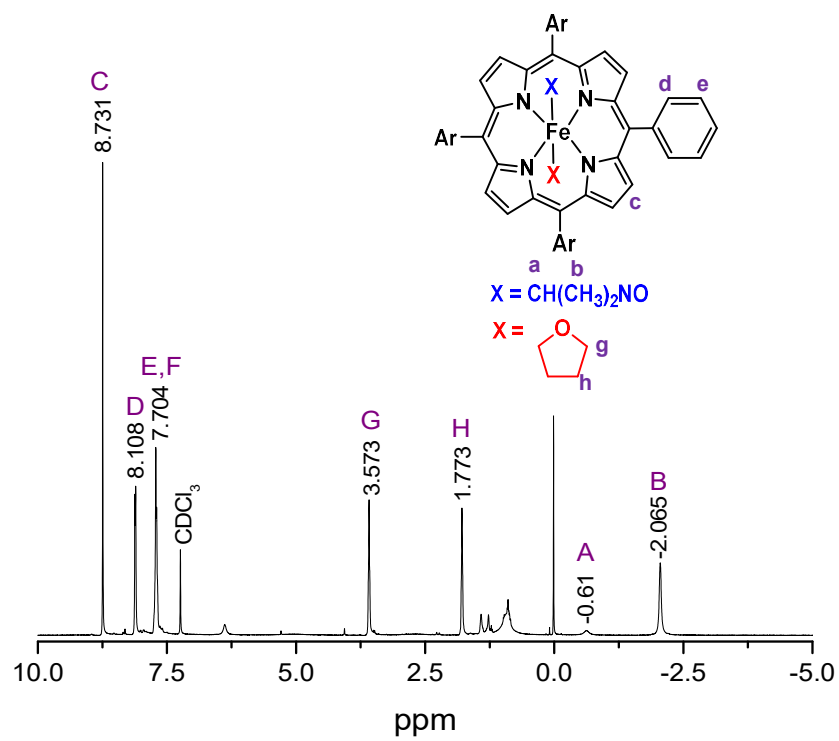

**Figure S9.**  $^1\text{H-NMR}$  spectrum of  $[\text{Fe}(\text{TPP})(\text{THF})(\text{iPrNO})]$  in  $\text{CDCl}_3$ , with the line width set to 0.3 Hz, measured at room temperature.

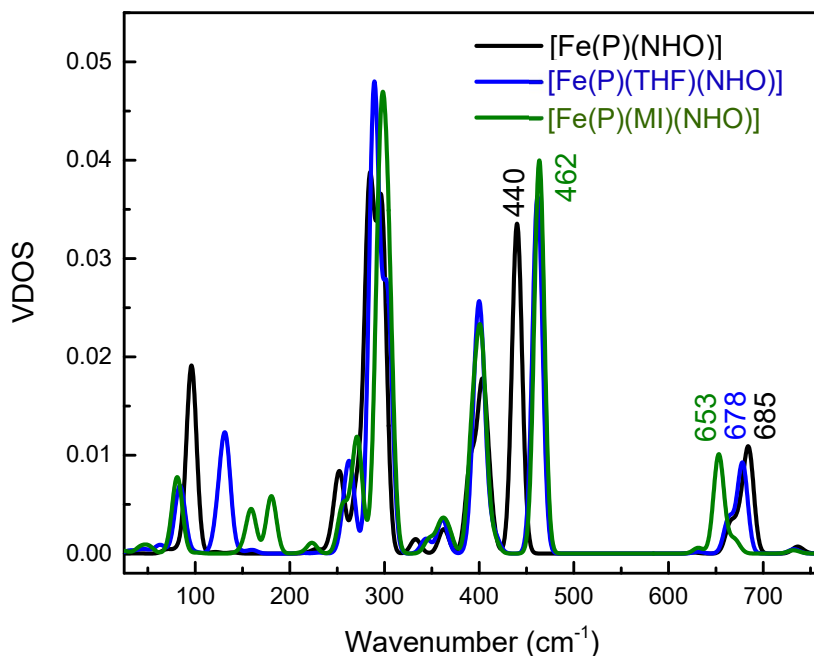

**Figure S10.** BP86/TZVP calculated NRVS VDOS for [Fe(P)(NHO)] (black), [Fe(P)(THF)(NHO)] (blue), and [Fe(P)(MI)(NHO)] (green).

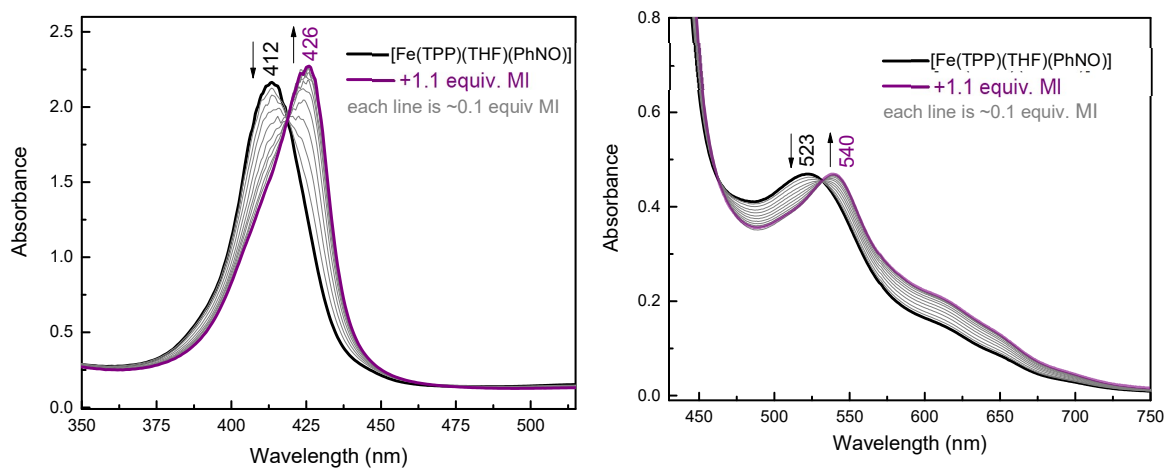

**Figure S11.** Left: UV-vis spectra following the titration of  $\sim 13 \mu\text{M}$  [Fe(TPP)(THF)(PhNO)] (black) with a solution of MI in dichloromethane, forming the six-coordinate complex [Fe(TPP)(MI)(PhNO)] (purple). Right: UV-vis spectra of the titration of  $\sim 51 \mu\text{M}$  [Fe(TPP)(THF)(PhNO)] (black) with a solution of MI in dichloromethane, forming the six-coordinate complex [Fe(TPP)(MI)(PhNO)] (purple). In both cases, the reaction is complete after the addition of  $\sim 1.0$  equivalent MI to the solution. The spectra were recorded at room temperature.

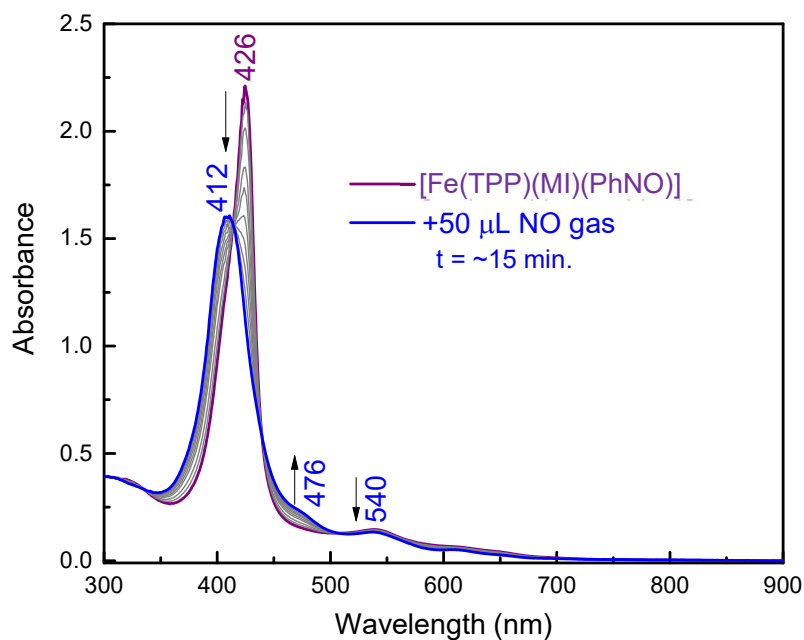

**Figure S12.** *In situ* UV-vis monitoring of the reaction of  $[\text{Fe}(\text{TPP})(\text{MI})(\text{PhNO})]$  (purple) with 50  $\mu\text{L}$  of NO gas ( $\sim 6$  equiv.) in dichloromethane. The product is the ferrous NO complex,  $[\text{Fe}(\text{TPP})(\text{NO})]$  (blue). The spectra were recorded at room temperature.

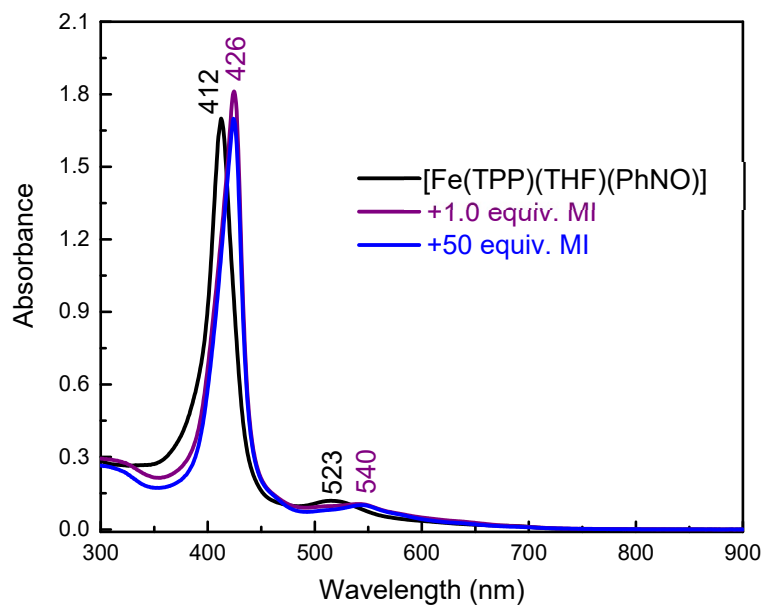

**Figure S13.** UV-vis spectra of a solution of  $[\text{Fe}(\text{TPP})(\text{THF})(\text{PhNO})]$  (black), with  $\sim 1$  equiv. MI added to the solution (purple), and 50 equiv. MI added to the same solution (blue). The spectra were recorded at room temperature.

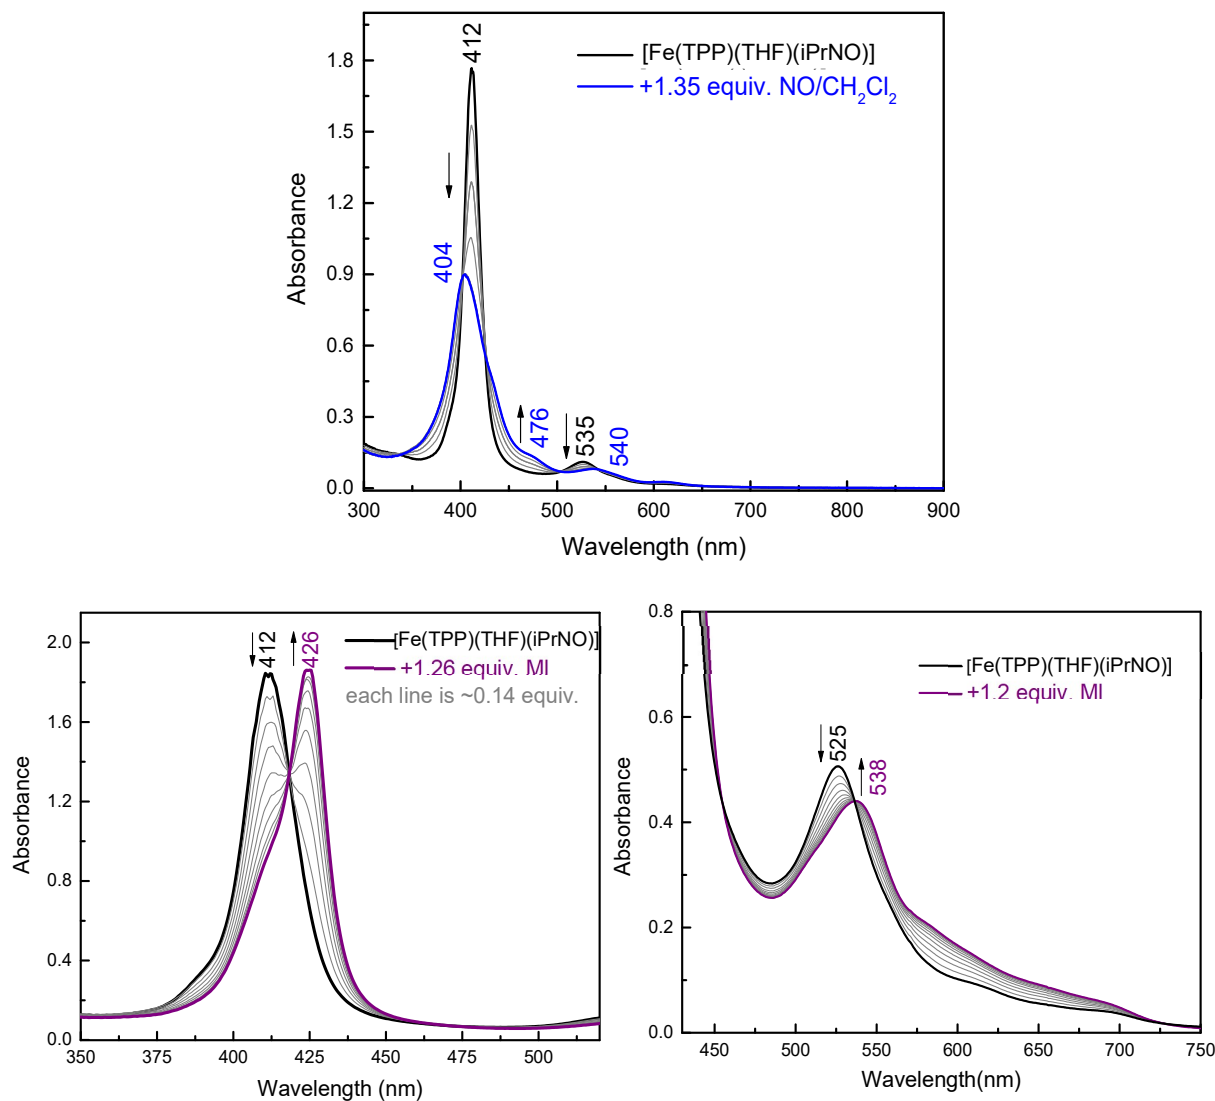

**Figure S14.** Top: *In situ* UV-vis monitoring of the titration of  $\sim 16 \mu\text{M}$   $[\text{Fe}(\text{TPP})(\text{THF})(\text{iPrNO})]$  (black) in  $\text{CH}_2\text{Cl}_2$  with a NO saturated solution in dichloromethane, forming the ferrous NO complex  $[\text{Fe}(\text{TPP})(\text{NO})]$  (blue). Bottom left: UV-vis spectra following the titration of  $\sim 16 \mu\text{M}$   $[\text{Fe}(\text{TPP})(\text{THF})(\text{iPrNO})]$  (black) with a solution of MI in dichloromethane, forming the six-coordinate complex  $[\text{Fe}(\text{TPP})(\text{MI})(\text{iPrNO})]$  (purple). Bottom right: UV-vis spectra of the titration of  $\sim 74 \mu\text{M}$   $[\text{Fe}(\text{TPP})(\text{THF})(\text{iPrNO})]$  (black) with a solution of MI in dichloromethane, forming the six-coordinate complex  $[\text{Fe}(\text{TPP})(\text{MI})(\text{iPrNO})]$  (purple). The reaction is complete after the addition of  $\sim 1.0$  equivalent MI to the solution.



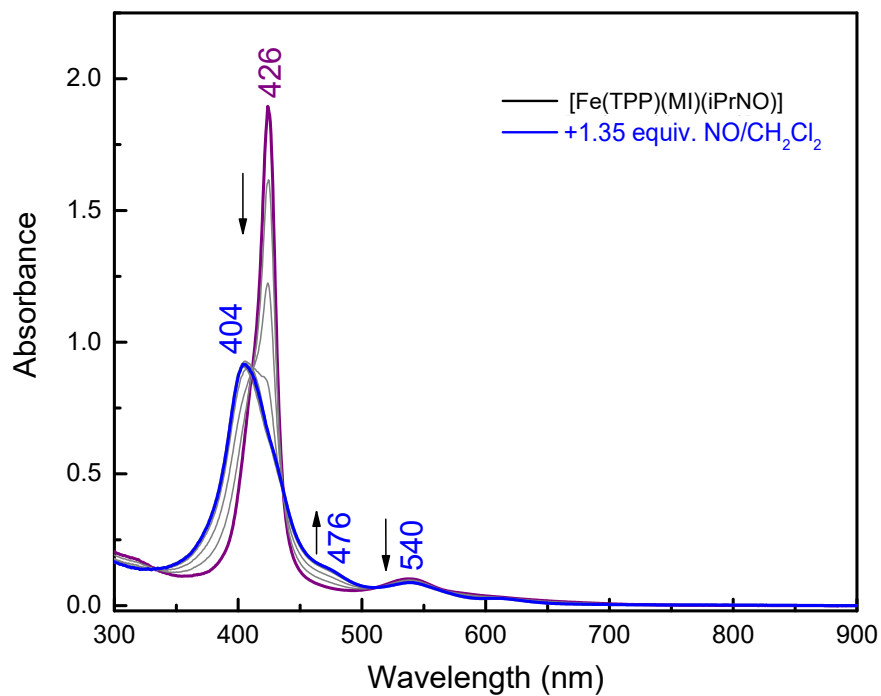

**Figure S15.** *In situ* UV-vis monitoring of the titration of  $\sim 16 \mu\text{M}$  [Fe(TPP)(MI)(iPrNO)] (purple) in  $\text{CH}_2\text{Cl}_2$  with a NO saturated solution in dichloromethane, forming the ferrous NO complex [Fe(TPP)(NO)] (blue).

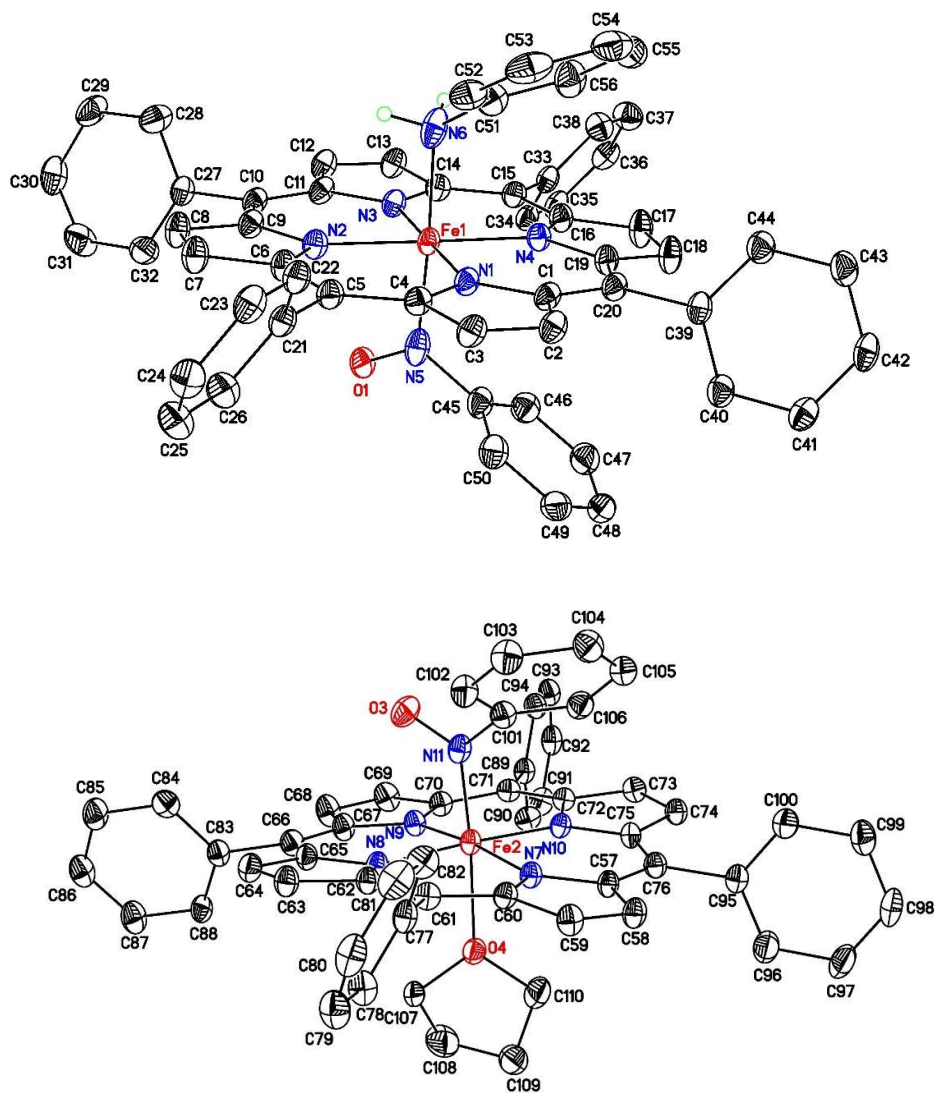

**Figure S16.** Structural diagrams including the atomic numbering schemes for the crystal structures of [Fe(TPP)(PhNH<sub>2</sub>)(PhNO)] (top) and [Fe(TPP)(THF)(PhNO)] (bottom). Hydrogen atoms (except for the amino group of PhNH<sub>2</sub>) and solvent molecules are omitted for clarity.

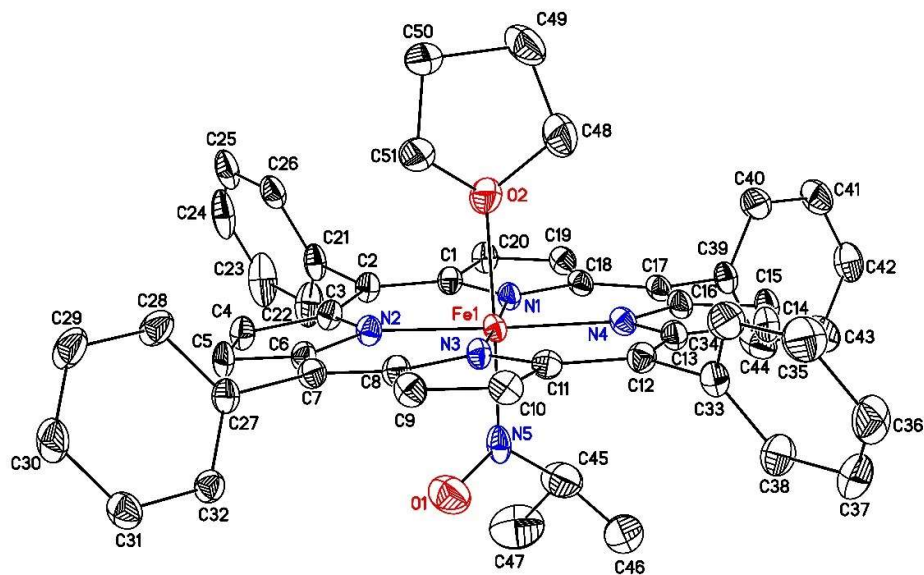

**Figure S17.** Structural diagram including the atomic numbering scheme for the crystal structure of [Fe(TPP)(THF)(iPrNO)]. Hydrogen atoms are omitted for clarity.

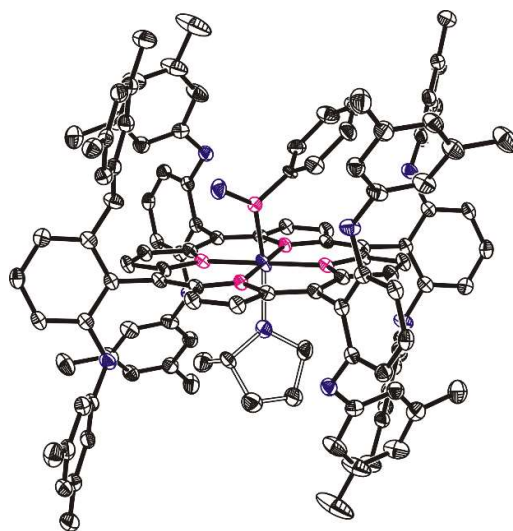

**Figure S18.** Structural diagram including the atomic numbering scheme for the crystal structure of [Fe(3,5-Me-BAFP)(2-MeTHF)(PhNO)]. Hydrogen atoms are omitted for clarity.

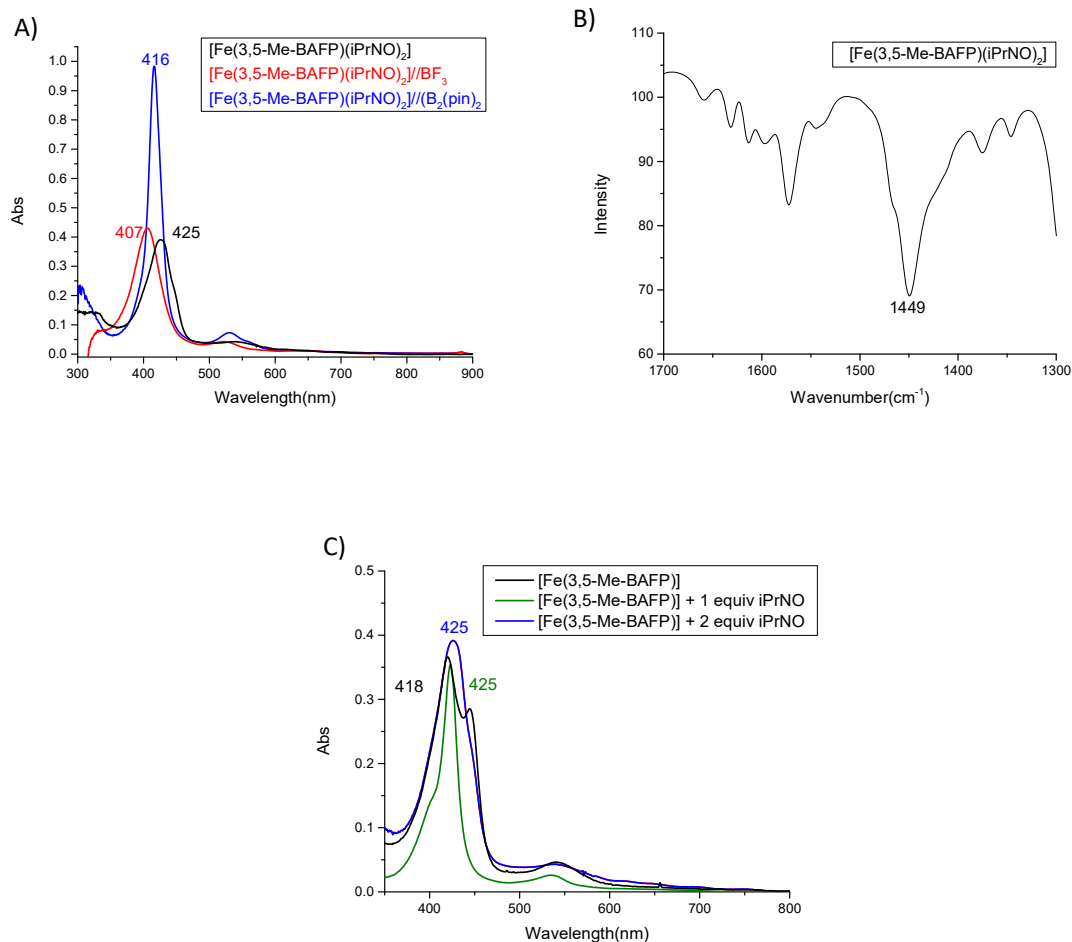

**Figure S19.** A) UV-Vis spectra of [Fe(3,5-Me-BAFP)(iPrNO)<sub>2</sub>] (black), [Fe(3,5-Me-BAFP)(iPrNO)<sub>2</sub>] reacted with BF<sub>3</sub>•OEt<sub>2</sub> (red), and [Fe(3,5-Me-BAFP)(iPrNO)<sub>2</sub>] reacted with B<sub>2</sub>(pin)<sub>2</sub> (blue), all taken in THF. B) ATR IR spectrum of [Fe(3,5-Me-BAFP)(iPrNO)<sub>2</sub>] with the N-O stretching frequency observed at 1449 cm<sup>-1</sup>. C) UV-Vis spectra of [Fe(3,5-Me-BAFP)] (black) reacted with 1 equiv iPrNO (green) and 2 equiv iPrNO (blue) in THF.

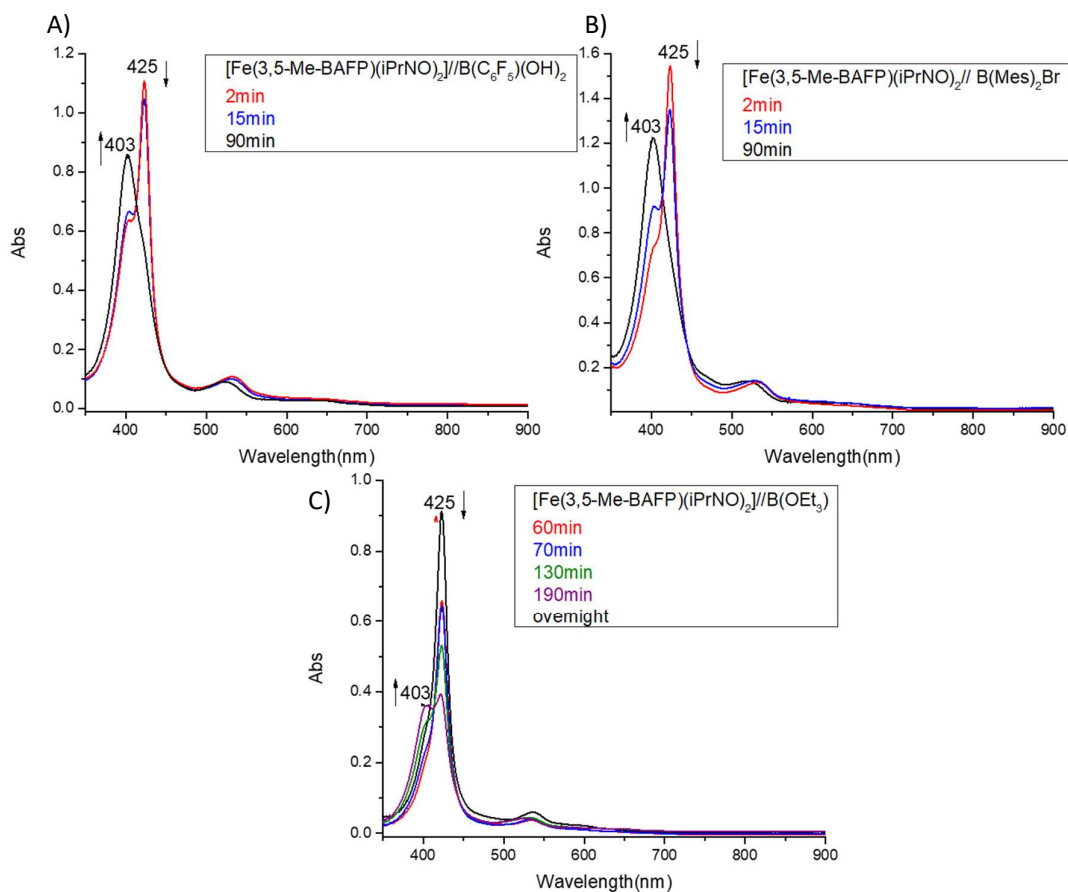

**Figure S20.** UV-Vis spectra of  $[\text{Fe}(3,5\text{-Me-BAFP})(\text{iPrNO})_2]$  reacted with different Lewis acids monitored over time. A)  $[\text{Fe}(3,5\text{-Me-BAFP})(\text{iPrNO})_2]$  reacted with  $\text{B}(\text{C}_6\text{F}_5)(\text{OH})_2$ , B)  $[\text{Fe}(3,5\text{-Me-BAFP})(\text{iPrNO})_2]$  reacted with  $\text{B}(\text{Mes})_2\text{Br}$ , and C)  $[\text{Fe}(3,5\text{-Me-BAFP})(\text{iPrNO})_2]$  reacted with  $\text{B}(\text{OEt})_3$ . All spectra were recorded in THF.

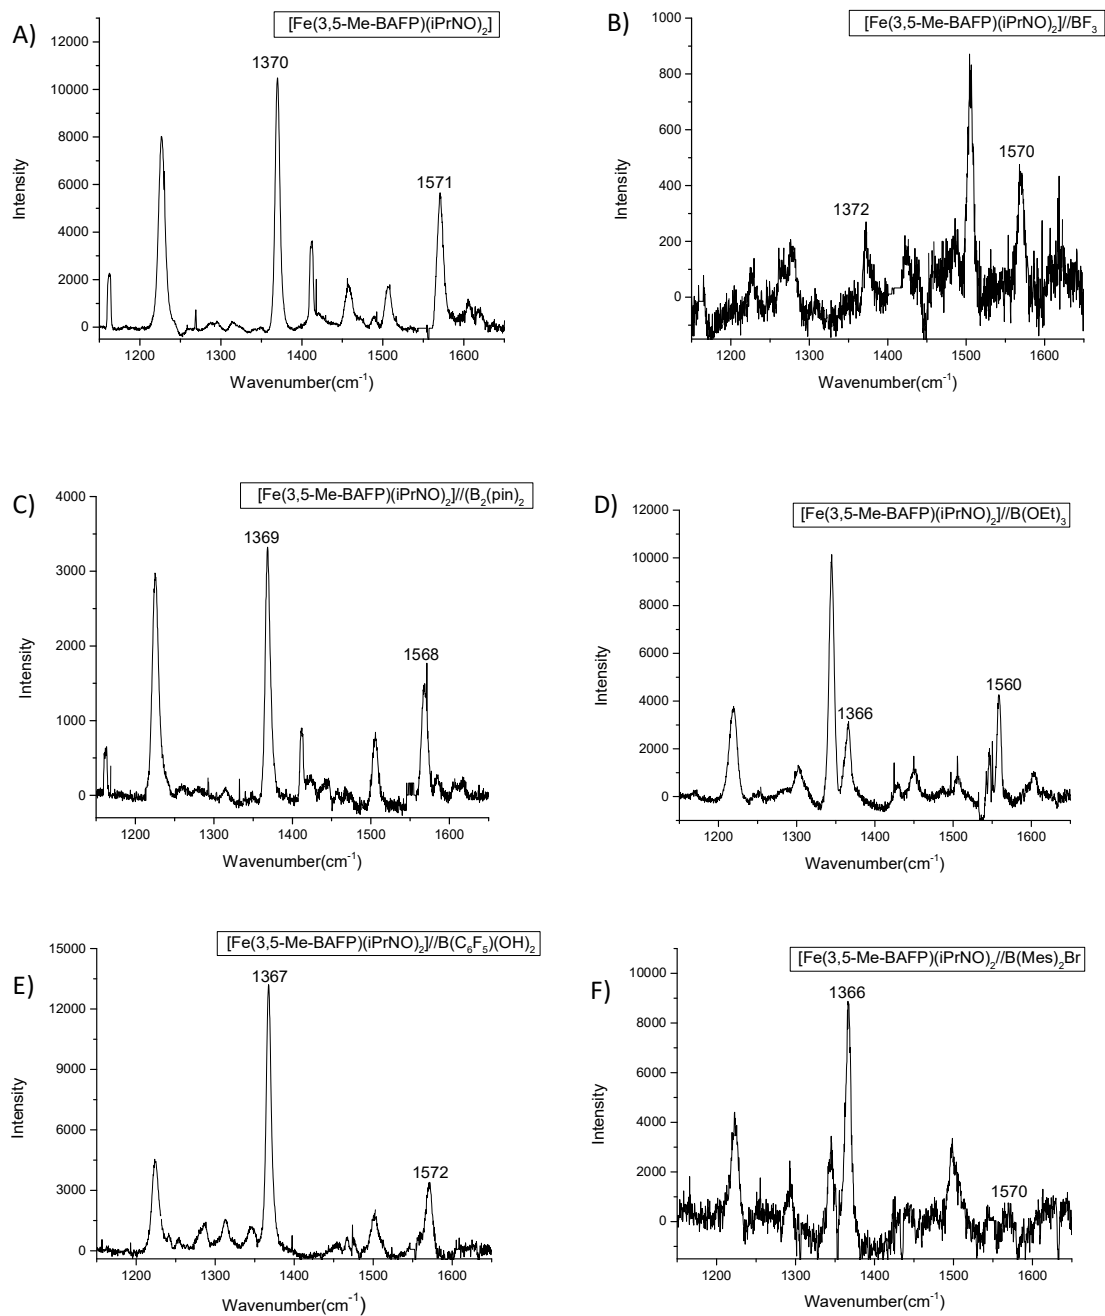

**Figure S21.** rRaman spectra in THF of A) 1 mM  $[\text{Fe}(3,5\text{-Me-BAFP})(\text{iPrNO})_2]$  B) 1 mM  $[\text{Fe}(3,5\text{-Me-BAFP})(\text{iPrNO})_2]$  reacted with  $\text{BF}_3 \cdot \text{OEt}_2$  C) 1 mM  $[\text{Fe}(3,5\text{-Me-BAFP})(\text{iPrNO})_2]$  reacted with  $\text{B}_2(\text{pin})_2$  D) 1 mM  $[\text{Fe}(3,5\text{-Me-BAFP})(\text{iPrNO})_2]$  reacted with  $\text{B}(\text{OEt})_3$  E) 1 mM  $[\text{Fe}(3,5\text{-Me-BAFP})(\text{iPrNO})_2]$  reacted with  $\text{B}(\text{C}_6\text{F}_5)(\text{OH})_2$  F) 1 mM  $[\text{Fe}(3,5\text{-Me-BAFP})(\text{iPrNO})_2]$  reacted with  $\text{B}(\text{Mes})_2\text{Br}$ .

**Crystal structure determination of [Fe(TPP)(THF)(iPrNO)] (University of Michigan):** A brown plate of [Fe(TPP)(THF)(iPrNO)] of dimensions 0.24 x 0.14 x 0.12 mm was mounted on a Rigaku AFC10K Saturn 944+ CCD-based X-ray diffractometer equipped with a low temperature device and a Micromax-007HF Cu-target micro-focus rotating anode ( $\lambda = 1.54187 \text{ \AA}$ ) operated at 1.2 kW power (40 kV, 30 mA). The X-ray intensities were measured at 85 K with the detector placed at a distance of 42.00 mm from the crystal. A total of 3857 images were collected with an oscillation width of  $1.0^\circ$  in  $\omega$ . The exposure times were 5 s for the low angle images, 30 s for high angle. Rigaku d\*trek images were exported to CrysAlisPro for processing and corrected for absorption. The integration of the data yielded a total of 103,181 reflections to a maximum  $2\theta$  value of  $136.38^\circ$  of which 7302 were independent and 7094 were greater than  $2\sigma(I)$ . The final cell constants were based on the xyz centroids of 56,915 reflections above  $10\sigma(I)$ . Analysis of the data showed negligible decay during data collection; the data were processed with CrystalClear 2.0 and corrected for absorption. The structure was solved and refined with the Bruker SHELXTL (version 2008/4) software package,<sup>1</sup> using the space group  $P2(1)/c$  with  $Z = 4$  for the formula  $C_{51}H_{43}N_5O_2Fe$ . All non-hydrogen atoms were refined anisotropically with the hydrogen atoms placed in idealized positions. Full matrix least-squares refinement based on  $F^2$  converged at  $R1 = 0.0612$  and  $wR2 = 0.1627$  [based on  $I > 2\sigma(I)$ ],  $R1 = 0.0621$  and  $wR2 = 0.1635$  for all data. Additional details are presented in **Tables S7-S12** and are given as Supporting Information in a CIF file, which was deposited in the CCDC (#2341278).

**Crystal structure determination for [Fe(TPP)(THF)(PhNO)]/[Fe(TPP)(PhNO)(PhNH<sub>2</sub>)] (University of Michigan):** A brown plate of [Fe(TPP)(THF)(PhNO)]/[Fe(TPP)(PhNO)(PhNH<sub>2</sub>)] of dimensions 0.22 x 0.14 x 0.12 mm was mounted on a Rigaku AFC10K Saturn 944+ CCD-based X-ray diffractometer equipped with a low temperature device and a Micromax-007HF Cu-target micro-focus rotating anode ( $\lambda = 1.54184 \text{ \AA}$ ) operated at 1.2 kW power (40 kV, 30 mA). The X-ray intensities were measured at 85 K with the detector placed at a distance of 42.00 mm from the crystal. A total of 4223 images were collected with an oscillation width of  $1.0^\circ$  in  $\omega$ . The exposure times were 2 s for the low angle images, 12 s for high angle. Rigaku d\*trek images were exported to CrysAlisPro for processing and corrected for absorption. The integration of the data yielded a total of 137,394 reflections to a maximum  $2\theta$  value of  $147.91^\circ$  of which 17,016 were independent and 16,662 were greater than  $2\sigma(I)$ . The final cell constants were based on the xyz centroids of 67,011 reflections above  $10\sigma(I)$ . Analysis of the data showed negligible decay during data collection; the data were processed with CrystalClear 2.0 and corrected for absorption. The structure was solved and refined with the Bruker SHELXTL (version 2014/6) software package,<sup>1</sup> using the space group P1bar with  $Z = 2$  for the formula  $C_{114}H_{89}N_{11}O_4Fe_2$ . All non-hydrogen atoms were refined anisotropically with the hydrogen atoms placed in idealized positions. Full matrix least-squares refinement based on  $F^2$  converged at  $R1 = 0.0436$  and  $wR2 = 0.1159$  [based on  $I > 2\sigma(I)$ ],  $R1 = 0.0444$  and  $wR2 = 0.1169$  for all data. Additional details are presented in **Tables S1-S6** and are given as Supporting Information in a CIF file, which was deposited in the CCDC (#2340714).



**Crystal Structure Determination of [Fe(3,5-Me-BAFP)(iPrNO)<sub>2</sub>] and [Fe(3,5-Me-BAFP)(iPrNO)(iPrNH<sub>2</sub>)] (Purdue University):** Single crystals of [Fe(3,5-Me-BAFP)(iPrNO)(iPrNH<sub>2</sub>)] were coated with perfluoropolyether and quickly transferred to the goniometer head of a Bruker Quest diffractometer with kappa geometry, an I- $\mu$ -S microsource X-ray tube, laterally graded multilayer (Goebel) mirror single crystal for monochromatization, a Photon-III C14 area detector and an Oxford Cryosystems low temperature device. Examination and data collection were performed with Cu K $\alpha$  radiation ( $\lambda = 1.54178 \text{ \AA}$ ) at low temperatures.

Single crystals of [Fe(3,5-Me-BAFP)(iPrNO)<sub>2</sub>] were coated with perfluoropolyether and quickly transferred to the goniometer head of a Bruker Quest diffractometer with a fixed chi angle, a sealed tube fine focus X-ray tube, single crystal curved graphite incident beam monochromator, a Photon II area detector and an Oxford Cryosystems low temperature device. Examination and data collection were performed with Mo K $\alpha$  radiation ( $\lambda = 0.71073 \text{ \AA}$ ) at low temperatures.

Data were collected, reflections were indexed and processed, and the files scaled and corrected for absorption using APEX3<sup>2</sup> and SADABS<sup>3</sup>. The space groups were assigned using XPREP within the SHELXTL suite of programs<sup>4, 5</sup> and solved by direct methods using ShelXS<sup>5</sup> or dual methods using ShelXT<sup>6</sup> and refined by full matrix least squares against F<sup>2</sup> with all reflections using Shelxl2018<sup>7, 8</sup> using the graphical interface Shelxl<sup>9</sup>. If not specified otherwise H atoms attached to carbon, boron and nitrogen atoms as well as hydroxyl hydrogens were positioned geometrically and constrained to ride on their parent atoms. C-H bond distances were constrained to 0.95  $\text{\AA}$  for aromatic and alkene C-H and CH<sub>2</sub> and alkyne C-H moieties, and to 1.00, 0.99 and 0.98  $\text{\AA}$  for aliphatic C-H, CH<sub>2</sub> and CH<sub>3</sub> moieties, respectively. N-H bond distances were constrained to 0.88  $\text{\AA}$  for planar (sp<sup>2</sup> hybridized) N-H, N-H<sup>+</sup> and NH<sub>2</sub> groups. N-H bond distances were constrained to 0.91  $\text{\AA}$  for pyramidal (sp<sup>3</sup> hybridized) ammonium NH<sub>2</sub><sup>+</sup> and NH<sub>3</sub><sup>+</sup> groups. O-H distances of alcohols were constrained to 0.84  $\text{\AA}$ . Methyl CH<sub>3</sub>, ammonium NH<sub>3</sub><sup>+</sup> and hydroxyl H atoms were allowed to rotate but not to tip to best fit the experimental electron density. H atoms of pyramidalized R<sub>2</sub>NH and RNH<sub>2</sub> units were refined

and N-H distances were restrained to 0.88(2) Å. Where necessary, water H···H distances were restrained to 1.36(2) Å, and H atom positions were further restrained based on hydrogen bonding considerations.  $U_{\text{iso}}(\text{H})$  values were set to a multiple of  $U_{\text{eq}}(\text{C})$  with 1.5 for CH<sub>3</sub>, NH<sub>3</sub><sup>+</sup> and OH, and 1.2 for C-H, CH<sub>2</sub>, B-H, N-H and NH<sub>2</sub> units, respectively. Additional data collection and refinement details, including description of disorder (where present) can be found above. This material is based upon work supported by the National Science Foundation through the Major Research Instrumentation Program under Grant CHE-1625543 (funding for the single crystal X-ray diffractometer). Additional details are presented in **Tables S13-S21** (two crystals) and **Tables S22-S26**, respectively, and are given as Supporting Information in CIF files, which were deposited in the CCDC (#2339812 and #2339811).

**Crystal structure determination for [Fe(3,5-Me-BAFP)(2-MeTHF)(PhNO)] (University of Michigan):** Brown block-like crystals of [Fe(3,5-Me-BAFP)(2-MeTHF)(PhNO)] were grown from 2-methyl-tetrahydrofuran/hexanes solution of the compound at 22 deg. C. A crystal of dimensions 0.12 x 0.12 x 0.10 mm was mounted on a Rigaku AFC10K Saturn 944+ CCD-based X-ray diffractometer equipped with a low temperature device and Micromax-007HF Cu-target micro-focus rotating anode ( $\lambda = 1.54187 \text{ \AA}$ ) operated at 1.2 kW power (40 kV, 30 mA). The X-ray intensities were measured at 85(1) K with the detector placed at a distance 42.00 mm from the crystal. A total of 4005 images were collected with an oscillation width of  $1.0^\circ$  in  $\omega$ . The exposure time was 2 sec. for the low angle images, 10 sec. for high angle. The integration of the data yielded a total of 127,465 reflections to a maximum  $2\theta$  value of  $136.46^\circ$  of which 8510 were independent and 8187 were greater than  $2\sigma(I)$ . The final cell constants were based on the xyz centroids 78,234 reflections above  $10\sigma(I)$ . Analysis of the data showed negligible decay during data collection; the data were processed with CrystalClear 2.0 and corrected for absorption. The structure was solved with the Bruker SHELXT (SHELXT 2018) and refined with the Bruker SHELXL (version 2019/2) software package,<sup>1</sup> using the space group P2(1)/c with  $Z = 2$  for the formula  $C_{119}H_{107}N_5O_{10}Fe$ . All non-hydrogen atoms were refined anisotropically with the hydrogen atoms placed in idealized positions. The complex lies on an inversion center of the crystal lattice. The axial positions of the core iron atom have coordinated 2-MeTHF and nitrosobenzene molecules in a 1:1 ratio disordered over the inversion center, resulting in a fixed occupation of 0.5 for both ligands per molecule in the asymmetric unit. Full matrix least-squares refinement based on F2 converged at  $R1 = 0.0428$  and  $wR2 = 0.1112$  [based on  $I > 2\sigma(I)$ ],  $R1 = 0.0440$  and  $wR2 = 0.1122$  for all data. Additional details are presented in **Table S27-S31** and are given as Supporting Information in a CIF file, which was deposited in the CCDC (#2357458). Acknowledgement is made for funding from NSF grant CHE-0840456 for X-ray instrumentation.

**Table S1.** Crystal data and structure refinement for [Fe(TPP)(THF)(PhNO)] and [Fe(TPP)(PhNH<sub>2</sub>)(PhNO)].

---

|                                   |                                                                                                                                                 |
|-----------------------------------|-------------------------------------------------------------------------------------------------------------------------------------------------|
| Empirical formula                 | C <sub>114</sub> H <sub>89</sub> Fe <sub>2</sub> N <sub>11</sub> O <sub>4</sub>                                                                 |
| Formula weight                    | 1788.66                                                                                                                                         |
| Temperature                       | 85(2) K                                                                                                                                         |
| Wavelength                        | 1.54184 Å                                                                                                                                       |
| Crystal system, space group       | Triclinic, P-1                                                                                                                                  |
| Unit cell dimensions              | a = 11.75223(16) Å    alpha = 93.5688(10) deg.<br>b = 17.0546(2) Å    beta = 100.6223(10) deg.<br>c = 23.4214(2) Å    gamma = 109.2852(13) deg. |
| Volume                            | 4316.45(10) Å <sup>3</sup>                                                                                                                      |
| Z, Calculated density             | 2, 1.376 Mg/m <sup>3</sup>                                                                                                                      |
| Absorption coefficient            | 3.217 mm <sup>-1</sup>                                                                                                                          |
| F(000)                            | 1868                                                                                                                                            |
| Crystal size                      | 0.220 x 0.140 x 0.120 mm                                                                                                                        |
| Theta range for data collection   | 2.769 to 73.953 deg.                                                                                                                            |
| Limiting indices                  | -14<=h<=14, -21<=k<=20, -29<=l<=29                                                                                                              |
| Reflections collected / unique    | 137394 / 17016 [R(int) = 0.0679]                                                                                                                |
| Completeness to theta =           | 67.684 98.7 %                                                                                                                                   |
| Absorption correction             | Semi-empirical from equivalents                                                                                                                 |
| Max. and min. transmission        | 1.00000 and 0.80581                                                                                                                             |
| Refinement method                 | Full-matrix least-squares on F <sup>2</sup>                                                                                                     |
| Data / restraints / parameters    | 17016 / 246 / 1342                                                                                                                              |
| Goodness-of-fit on F <sup>2</sup> | 1.058                                                                                                                                           |
| Final R indices [I>2sigma(I)]     | R1 = 0.0436, wR2 = 0.1159                                                                                                                       |
| R indices (all data)              | R1 = 0.0444, wR2 = 0.1169                                                                                                                       |
| Extinction coefficient            | n/a                                                                                                                                             |
| Largest diff. peak and hole       | 0.895 and -0.521 e.Å <sup>-3</sup>                                                                                                              |

---

**Table S2.** Atomic coordinates ( $\times 10^4$ ) and equivalent isotropic displacement parameters ( $\text{\AA}^2 \times 10^2$ ) for [Fe(TPP)(THF)(PhNO)] and [Fe(TPP)(PhNH<sub>2</sub>)(PhNO)]. U(eq) is defined as one third of the trace of the orthogonalized U<sub>ij</sub> tensor.

|       | x        | y       | z        | U(eq) |
|-------|----------|---------|----------|-------|
| Fe(1) | 9352(1)  | 7387(1) | 8582(1)  | 18(1) |
| Fe(2) | 499(1)   | 2691(1) | 6313(1)  | 17(1) |
| O(1)  | 10283(3) | 8921(2) | 9278(1)  | 27(1) |
| O(2)  | 7169(3)  | 6053(2) | 8436(1)  | 31(1) |
| N(1)  | 9547(1)  | 7589(1) | 7767(1)  | 19(1) |
| N(2)  | 7965(1)  | 7836(1) | 8485(1)  | 20(1) |
| N(3)  | 9146(1)  | 7171(1) | 9394(1)  | 20(1) |
| N(4)  | 10725(1) | 6926(1) | 8676(1)  | 20(1) |
| N(5)  | 10517(2) | 8514(1) | 8914(1)  | 28(1) |
| N(6)  | 8108(2)  | 6249(1) | 8284(1)  | 31(1) |
| N(7)  | 735(1)   | 2252(1) | 5551(1)  | 18(1) |
| N(8)  | 2318(1)  | 3311(1) | 6567(1)  | 19(1) |
| N(9)  | 288(1)   | 3013(1) | 7111(1)  | 19(1) |
| N(10) | -1304(1) | 2020(1) | 6072(1)  | 17(1) |
| N(11) | 393(1)   | 3654(1) | 6064(1)  | 21(1) |
| C(1)  | 10377(2) | 7423(1) | 7479(1)  | 20(1) |
| C(2)  | 10205(2) | 7648(1) | 6895(1)  | 23(1) |
| C(3)  | 9286(2)  | 7958(1) | 6834(1)  | 23(1) |
| C(4)  | 8861(2)  | 7915(1) | 7374(1)  | 20(1) |
| C(5)  | 7890(2)  | 8166(1) | 7471(1)  | 21(1) |
| C(6)  | 7469(2)  | 8111(1) | 7992(1)  | 22(1) |
| C(7)  | 6431(2)  | 8333(1) | 8085(1)  | 26(1) |
| C(8)  | 6325(2)  | 8212(1) | 8641(1)  | 26(1) |
| C(9)  | 7277(2)  | 7904(1) | 8889(1)  | 21(1) |
| C(10) | 7450(2)  | 7698(1) | 9457(1)  | 21(1) |
| C(11) | 8309(2)  | 7336(1) | 9680(1)  | 21(1) |
| C(12) | 8444(2)  | 7077(1) | 10254(1) | 25(1) |
| C(13) | 9371(2)  | 6769(1) | 10319(1) | 25(1) |
| C(14) | 9824(2)  | 6840(1) | 9787(1)  | 21(1) |
| C(15) | 10806(2) | 6599(1) | 9692(1)  | 21(1) |
| C(16) | 11217(2) | 6648(1) | 9168(1)  | 22(1) |
| C(17) | 12264(2) | 6438(1) | 9076(1)  | 29(1) |
| C(18) | 12400(2) | 6588(1) | 8530(1)  | 28(1) |
| C(19) | 11433(2) | 6883(1) | 8279(1)  | 21(1) |
| C(20) | 11276(2) | 7098(1) | 7712(1)  | 20(1) |
| C(21) | 7264(2)  | 8512(1) | 6986(1)  | 21(1) |
| C(22) | 6658(2)  | 8024(1) | 6446(1)  | 22(1) |
| C(23) | 6100(2)  | 8353(1) | 5992(1)  | 24(1) |
| C(24) | 6142(2)  | 9173(1) | 6071(1)  | 28(1) |
| C(25) | 6736(2)  | 9663(1) | 6607(1)  | 30(1) |
| C(26) | 7289(2)  | 9335(1) | 7061(1)  | 26(1) |
| C(27) | 6698(2)  | 7905(1) | 9856(1)  | 21(1) |

|        |          |         |          |       |
|--------|----------|---------|----------|-------|
| C(28)  | 5700(5)  | 7268(4) | 9982(3)  | 32(1) |
| C(29)  | 5006(5)  | 7458(4) | 10353(3) | 34(1) |
| C(28A) | 5455(5)  | 7495(3) | 9793(2)  | 26(1) |
| C(29A) | 4790(5)  | 7708(4) | 10174(3) | 30(1) |
| C(30)  | 5340(2)  | 8316(2) | 10612(1) | 34(1) |
| C(31)  | 6284(8)  | 8884(5) | 10480(3) | 35(2) |
| C(32)  | 6980(6)  | 8699(4) | 10108(3) | 30(1) |
| C(31A) | 6616(7)  | 8813(6) | 10682(3) | 41(2) |
| C(32A) | 7284(6)  | 8592(5) | 10304(3) | 35(2) |
| C(33)  | 11475(2) | 6293(1) | 10185(1) | 22(1) |
| C(34)  | 12049(2) | 6808(1) | 10719(1) | 23(1) |
| C(35)  | 12681(2) | 6533(1) | 11176(1) | 25(1) |
| C(36)  | 12764(2) | 5744(1) | 11110(1) | 28(1) |
| C(37)  | 12195(2) | 5224(1) | 10584(1) | 31(1) |
| C(38)  | 11552(2) | 5496(1) | 10126(1) | 26(1) |
| C(39)  | 12129(2) | 6978(1) | 7340(1)  | 21(1) |
| C(40)  | 12986(2) | 7673(1) | 7185(1)  | 24(1) |
| C(41)  | 13817(2) | 7573(1) | 6861(1)  | 25(1) |
| C(42)  | 13796(2) | 6775(1) | 6687(1)  | 26(1) |
| C(43)  | 12936(2) | 6082(1) | 6828(1)  | 28(1) |
| C(44)  | 12103(2) | 6182(1) | 7154(1)  | 25(1) |
| C(45)  | 11743(2) | 8824(1) | 8798(1)  | 26(1) |
| C(46)  | 12720(2) | 8752(1) | 9195(1)  | 28(1) |
| C(47)  | 13900(2) | 9039(1) | 9089(1)  | 32(1) |
| C(48)  | 14102(2) | 9404(1) | 8585(1)  | 32(1) |
| C(49)  | 13122(2) | 9483(1) | 8193(1)  | 30(1) |
| C(50)  | 11936(2) | 9190(1) | 8294(1)  | 28(1) |
| C(51)  | 8127(2)  | 5770(1) | 7754(1)  | 27(1) |
| C(52)  | 7441(2)  | 5837(1) | 7223(1)  | 28(1) |
| C(53)  | 7498(2)  | 5401(1) | 6713(1)  | 35(1) |
| C(54)  | 8220(2)  | 4902(1) | 6736(1)  | 36(1) |
| C(55)  | 8892(2)  | 4834(1) | 7268(1)  | 36(1) |
| C(56)  | 8854(2)  | 5271(1) | 7780(1)  | 33(1) |
| C(57)  | -135(2)  | 1660(1) | 5119(1)  | 18(1) |
| C(58)  | 416(2)   | 1495(1) | 4646(1)  | 22(1) |
| C(59)  | 1612(2)  | 2004(1) | 4785(1)  | 22(1) |
| C(60)  | 1806(2)  | 2473(1) | 5348(1)  | 19(1) |
| C(61)  | 2942(2)  | 3052(1) | 5645(1)  | 20(1) |
| C(62)  | 3158(2)  | 3443(1) | 6214(1)  | 19(1) |
| C(63)  | 4330(2)  | 4041(1) | 6525(1)  | 23(1) |
| C(64)  | 4207(2)  | 4252(1) | 7067(1)  | 23(1) |
| C(65)  | 2942(2)  | 3806(1) | 7092(1)  | 21(1) |
| C(66)  | 2445(2)  | 3860(1) | 7582(1)  | 22(1) |
| C(67)  | 1196(2)  | 3486(1) | 7583(1)  | 22(1) |
| C(68)  | 665(2)   | 3572(1) | 8081(1)  | 29(1) |
| C(69)  | -560(2)  | 3161(1) | 7909(1)  | 26(1) |
| C(70)  | -797(2)  | 2814(1) | 7302(1)  | 20(1) |
| C(71)  | -1972(2) | 2374(1) | 6962(1)  | 19(1) |
| C(72)  | -2194(2) | 2018(1) | 6381(1)  | 18(1) |
| C(73)  | -3399(2) | 1517(1) | 6039(1)  | 21(1) |

|        |          |         |         |        |
|--------|----------|---------|---------|--------|
| C(74)  | -3233(2) | 1194(1) | 5532(1) | 21(1)  |
| C(75)  | -1927(2) | 1501(1) | 5554(1) | 18(1)  |
| C(76)  | -1385(2) | 1298(1) | 5114(1) | 19(1)  |
| C(77)  | 4002(2)  | 3270(1) | 5345(1) | 21(1)  |
| C(78)  | 5022(2)  | 3041(1) | 5548(1) | 26(1)  |
| C(79)  | 6040(2)  | 3274(1) | 5290(1) | 29(1)  |
| C(80)  | 6043(2)  | 3738(1) | 4825(1) | 29(1)  |
| C(81)  | 5031(2)  | 3963(1) | 4617(1) | 29(1)  |
| C(82)  | 4010(2)  | 3730(1) | 4874(1) | 26(1)  |
| C(83)  | 3295(17) | 4254(7) | 8161(5) | 21(2)  |
| C(84)  | 3870(10) | 5117(7) | 8253(4) | 26(2)  |
| C(85)  | 4736(8)  | 5513(5) | 8775(4) | 31(2)  |
| C(86)  | 4962(8)  | 5031(5) | 9206(3) | 30(2)  |
| C(87)  | 4383(8)  | 4181(5) | 9120(3) | 32(2)  |
| C(88)  | 3532(10) | 3786(4) | 8604(4) | 22(2)  |
| C(83A) | 3337(17) | 4417(7) | 8116(5) | 22(2)  |
| C(84A) | 3987(10) | 5268(6) | 8124(4) | 25(2)  |
| C(85A) | 4834(8)  | 5724(5) | 8625(3) | 31(2)  |
| C(86A) | 5068(7)  | 5353(5) | 9120(4) | 31(2)  |
| C(87A) | 4450(9)  | 4505(5) | 9119(3) | 33(2)  |
| C(88A) | 3602(11) | 4048(5) | 8613(4) | 27(2)  |
| C(89)  | -3057(2) | 2220(1) | 7245(1) | 20(1)  |
| C(90)  | -3328(2) | 1579(1) | 7593(1) | 25(1)  |
| C(91)  | -4330(2) | 1423(1) | 7861(1) | 28(1)  |
| C(92)  | -5076(2) | 1901(1) | 7780(1) | 26(1)  |
| C(93)  | -4825(2) | 2538(1) | 7431(1) | 25(1)  |
| C(94)  | -3814(2) | 2703(1) | 7168(1) | 23(1)  |
| C(95)  | -2182(2) | 667(1)  | 4601(1) | 20(1)  |
| C(96)  | -2304(2) | -171(1) | 4602(1) | 33(1)  |
| C(97)  | -3012(2) | -760(1) | 4119(1) | 37(1)  |
| C(98)  | -3610(2) | -519(1) | 3638(1) | 30(1)  |
| C(99)  | -3500(2) | 313(1)  | 3633(1) | 31(1)  |
| C(100) | -2786(2) | 905(1)  | 4112(1) | 29(1)  |
| C(101) | 223(2)   | 3788(1) | 5450(1) | 22(1)  |
| C(102) | 1177(2)  | 4396(1) | 5287(1) | 27(1)  |
| C(103) | 1057(2)  | 4525(1) | 4705(1) | 30(1)  |
| C(104) | -14(2)   | 4067(1) | 4295(1) | 29(1)  |
| C(105) | -964(2)  | 3470(1) | 4469(1) | 27(1)  |
| C(106) | -849(2)  | 3322(1) | 5049(1) | 24(1)  |
| C(107) | 1723(6)  | 1633(5) | 7120(3) | 26(1)  |
| C(108) | 1114(7)  | 802(6)  | 7371(4) | 44(2)  |
| C(17A) | 1385(9)  | 1648(6) | 7253(3) | 44(2)  |
| C(18A) | 1569(6)  | 832(5)  | 7299(3) | 34(2)  |
| C(109) | 541(2)   | 217(1)  | 6810(1) | 36(1)  |
| C(110) | 120(2)   | 758(1)  | 6389(1) | 43(1)  |
| O(3)   | 705(1)   | 4315(1) | 6412(1) | 29(1)  |
| O(4)   | 781(1)   | 1610(1) | 6642(1) | 23(1)  |
| O(10)  | -1219(6) | 775(4)  | 9773(2) | 93(2)  |
| C(111) | -2355(9) | 582(8)  | 9340(3) | 104(3) |
| C(112) | -1888(8) | 693(5)  | 8764(3) | 72(2)  |

|        |           |         |         |        |
|--------|-----------|---------|---------|--------|
| C(113) | -866(10)  | 356(8)  | 8793(4) | 106(3) |
| C(114) | -343(10)  | 625(9)  | 9475(4) | 114(4) |
| O(11)  | -946(7)   | 212(5)  | 9234(4) | 115(2) |
| C(115) | -1421(10) | 869(7)  | 9254(4) | 98(3)  |
| C(116) | -1417(14) | 1175(9) | 8700(4) | 127(4) |
| C(117) | -619(12)  | 998(8)  | 8465(5) | 122(4) |
| C(118) | -189(7)   | 278(5)  | 8795(4) | 100(3) |

---



**Table S3.** Bond lengths [Å] and angles [°] for [Fe(TPP)(THF)(PhNO)] and [Fe(TPP)(PhNH<sub>2</sub>)(PhNO)].

---

|              |            |
|--------------|------------|
| Fe(1)-N(5)   | 1.9635(19) |
| Fe(1)-N(6)   | 1.994(2)   |
| Fe(1)-N(4)   | 2.0008(16) |
| Fe(1)-N(2)   | 2.0012(16) |
| Fe(1)-N(1)   | 2.0020(15) |
| Fe(1)-N(3)   | 2.0031(15) |
| Fe(2)-N(11)  | 1.8129(17) |
| Fe(2)-N(7)   | 1.9947(15) |
| Fe(2)-N(9)   | 1.9962(15) |
| Fe(2)-N(10)  | 1.9982(15) |
| Fe(2)-N(8)   | 2.0005(15) |
| Fe(2)-O(4)   | 2.1415(14) |
| O(1)-N(5)    | 1.195(3)   |
| O(2)-N(6)    | 1.171(3)   |
| N(1)-C(1)    | 1.374(2)   |
| N(1)-C(4)    | 1.375(2)   |
| N(2)-C(9)    | 1.375(2)   |
| N(2)-C(6)    | 1.376(2)   |
| N(3)-C(14)   | 1.375(2)   |
| N(3)-C(11)   | 1.377(2)   |
| N(4)-C(19)   | 1.371(2)   |
| N(4)-C(16)   | 1.373(2)   |
| N(5)-C(45)   | 1.444(3)   |
| N(5)-H(5NA)  | 0.9100     |
| N(5)-H(5NB)  | 0.9100     |
| N(6)-C(51)   | 1.449(3)   |
| N(6)-H(6NA)  | 0.9100     |
| N(6)-H(6NB)  | 0.9100     |
| N(7)-C(60)   | 1.371(2)   |
| N(7)-C(57)   | 1.378(2)   |
| N(8)-C(62)   | 1.375(2)   |
| N(8)-C(65)   | 1.376(2)   |
| N(9)-C(70)   | 1.374(2)   |
| N(9)-C(67)   | 1.378(2)   |
| N(10)-C(72)  | 1.378(2)   |
| N(10)-C(75)  | 1.379(2)   |
| N(11)-O(3)   | 1.253(2)   |
| N(11)-C(101) | 1.457(2)   |
| C(1)-C(20)   | 1.391(3)   |
| C(1)-C(2)    | 1.441(2)   |
| C(2)-C(3)    | 1.340(3)   |
| C(2)-H(2A)   | 0.9500     |
| C(3)-C(4)    | 1.442(2)   |
| C(3)-H(3A)   | 0.9500     |
| C(4)-C(5)    | 1.393(3)   |
| C(5)-C(6)    | 1.395(2)   |

|               |          |
|---------------|----------|
| C(5)-C(21)    | 1.497(3) |
| C(6)-C(7)     | 1.439(3) |
| C(7)-C(8)     | 1.354(3) |
| C(7)-H(7A)    | 0.9500   |
| C(8)-C(9)     | 1.432(3) |
| C(8)-H(8A)    | 0.9500   |
| C(9)-C(10)    | 1.393(3) |
| C(10)-C(11)   | 1.389(3) |
| C(10)-C(27)   | 1.499(2) |
| C(11)-C(12)   | 1.438(3) |
| C(12)-C(13)   | 1.347(3) |
| C(12)-H(12A)  | 0.9500   |
| C(13)-C(14)   | 1.438(2) |
| C(13)-H(13A)  | 0.9500   |
| C(14)-C(15)   | 1.396(3) |
| C(15)-C(16)   | 1.398(2) |
| C(15)-C(33)   | 1.493(3) |
| C(16)-C(17)   | 1.437(3) |
| C(17)-C(18)   | 1.349(3) |
| C(17)-H(17A)  | 0.9500   |
| C(18)-C(19)   | 1.435(3) |
| C(18)-H(18A)  | 0.9500   |
| C(19)-C(20)   | 1.394(3) |
| C(20)-C(39)   | 1.497(2) |
| C(21)-C(26)   | 1.393(3) |
| C(21)-C(22)   | 1.395(3) |
| C(22)-C(23)   | 1.393(3) |
| C(22)-H(22A)  | 0.9500   |
| C(23)-C(24)   | 1.382(3) |
| C(23)-H(23A)  | 0.9500   |
| C(24)-C(25)   | 1.387(3) |
| C(24)-H(24A)  | 0.9500   |
| C(25)-C(26)   | 1.388(3) |
| C(25)-H(25A)  | 0.9500   |
| C(26)-H(26A)  | 0.9500   |
| C(27)-C(32)   | 1.352(7) |
| C(27)-C(28A)  | 1.371(6) |
| C(27)-C(28)   | 1.403(6) |
| C(27)-C(32A)  | 1.413(7) |
| C(28)-C(29)   | 1.387(8) |
| C(28)-H(28A)  | 0.9500   |
| C(29)-C(30)   | 1.444(7) |
| C(29)-H(29A)  | 0.9500   |
| C(28A)-C(29A) | 1.393(8) |
| C(28A)-H(28B) | 0.9500   |
| C(29A)-C(30)  | 1.314(6) |
| C(29A)-H(29B) | 0.9500   |
| C(30)-C(31)   | 1.312(9) |
| C(30)-C(31A)  | 1.430(9) |
| C(30)-H(30)   | 0.9500   |

|               |           |
|---------------|-----------|
| C(31)-C(32)   | 1.387(11) |
| C(31)-H(31A)  | 0.9500    |
| C(32)-H(32A)  | 0.9500    |
| C(31A)-C(32A) | 1.397(11) |
| C(31A)-H(31B) | 0.9500    |
| C(32A)-H(32B) | 0.9500    |
| C(33)-C(38)   | 1.392(3)  |
| C(33)-C(34)   | 1.397(3)  |
| C(34)-C(35)   | 1.384(3)  |
| C(34)-H(34A)  | 0.9500    |
| C(35)-C(36)   | 1.383(3)  |
| C(35)-H(35A)  | 0.9500    |
| C(36)-C(37)   | 1.387(3)  |
| C(36)-H(36A)  | 0.9500    |
| C(37)-C(38)   | 1.389(3)  |
| C(37)-H(37A)  | 0.9500    |
| C(38)-H(38A)  | 0.9500    |
| C(39)-C(44)   | 1.388(3)  |
| C(39)-C(40)   | 1.397(3)  |
| C(40)-C(41)   | 1.388(3)  |
| C(40)-H(40A)  | 0.9500    |
| C(41)-C(42)   | 1.387(3)  |
| C(41)-H(41A)  | 0.9500    |
| C(42)-C(43)   | 1.381(3)  |
| C(42)-H(42A)  | 0.9500    |
| C(43)-C(44)   | 1.393(3)  |
| C(43)-H(43A)  | 0.9500    |
| C(44)-H(44A)  | 0.9500    |
| C(45)-C(46)   | 1.383(3)  |
| C(45)-C(50)   | 1.391(3)  |
| C(46)-C(47)   | 1.385(3)  |
| C(46)-H(46A)  | 0.9500    |
| C(47)-C(48)   | 1.391(3)  |
| C(47)-H(47A)  | 0.9500    |
| C(48)-C(49)   | 1.384(3)  |
| C(48)-H(48A)  | 0.9500    |
| C(49)-C(50)   | 1.387(3)  |
| C(49)-H(49A)  | 0.9500    |
| C(50)-H(50A)  | 0.9500    |
| C(51)-C(52)   | 1.386(3)  |
| C(51)-C(56)   | 1.387(3)  |
| C(52)-C(53)   | 1.391(3)  |
| C(52)-H(52A)  | 0.9500    |
| C(53)-C(54)   | 1.383(4)  |
| C(53)-H(53A)  | 0.9500    |
| C(54)-C(55)   | 1.380(4)  |
| C(54)-H(54A)  | 0.9500    |
| C(55)-C(56)   | 1.388(3)  |
| C(55)-H(55A)  | 0.9500    |
| C(56)-H(56A)  | 0.9500    |

|              |          |
|--------------|----------|
| C(57)-C(76)  | 1.390(2) |
| C(57)-C(58)  | 1.440(2) |
| C(58)-C(59)  | 1.351(3) |
| C(58)-H(58A) | 0.9500   |
| C(59)-C(60)  | 1.439(2) |
| C(59)-H(59A) | 0.9500   |
| C(60)-C(61)  | 1.394(2) |
| C(61)-C(62)  | 1.391(2) |
| C(61)-C(77)  | 1.496(2) |
| C(62)-C(63)  | 1.442(2) |
| C(63)-C(64)  | 1.345(3) |
| C(63)-H(63A) | 0.9500   |
| C(64)-C(65)  | 1.443(3) |
| C(64)-H(64A) | 0.9500   |
| C(65)-C(66)  | 1.391(3) |
| C(66)-C(67)  | 1.393(3) |
| C(66)-C(83)  | 1.495(8) |
| C(66)-C(83A) | 1.509(9) |
| C(67)-C(68)  | 1.443(3) |
| C(68)-C(69)  | 1.345(3) |
| C(68)-H(68A) | 0.9500   |
| C(69)-C(70)  | 1.445(2) |
| C(69)-H(69A) | 0.9500   |
| C(70)-C(71)  | 1.393(3) |
| C(71)-C(72)  | 1.395(2) |
| C(71)-C(89)  | 1.499(2) |
| C(72)-C(73)  | 1.440(2) |
| C(73)-C(74)  | 1.352(3) |
| C(73)-H(73A) | 0.9500   |
| C(74)-C(75)  | 1.438(2) |
| C(74)-H(74A) | 0.9500   |
| C(75)-C(76)  | 1.390(3) |
| C(76)-C(95)  | 1.496(2) |
| C(77)-C(78)  | 1.390(3) |
| C(77)-C(82)  | 1.393(3) |
| C(78)-C(79)  | 1.392(3) |
| C(78)-H(78A) | 0.9500   |
| C(79)-C(80)  | 1.385(3) |
| C(79)-H(79A) | 0.9500   |
| C(80)-C(81)  | 1.382(3) |
| C(80)-H(80A) | 0.9500   |
| C(81)-C(82)  | 1.392(3) |
| C(81)-H(81A) | 0.9500   |
| C(82)-H(82A) | 0.9500   |
| C(83)-C(84)  | 1.385(9) |
| C(83)-C(88)  | 1.389(9) |
| C(84)-C(85)  | 1.404(9) |
| C(84)-H(84A) | 0.9500   |
| C(85)-C(86)  | 1.382(8) |
| C(85)-H(85A) | 0.9500   |

|               |          |
|---------------|----------|
| C(86)-C(87)   | 1.367(8) |
| C(86)-H(86A)  | 0.9500   |
| C(87)-C(88)   | 1.387(8) |
| C(87)-H(87A)  | 0.9500   |
| C(88)-H(88A)  | 0.9500   |
| C(83A)-C(88A) | 1.390(9) |
| C(83A)-C(84A) | 1.397(9) |
| C(84A)-C(85A) | 1.385(8) |
| C(84A)-H(84B) | 0.9500   |
| C(85A)-C(86A) | 1.382(8) |
| C(85A)-H(85B) | 0.9500   |
| C(86A)-C(87A) | 1.387(8) |
| C(86A)-H(86B) | 0.9500   |
| C(87A)-C(88A) | 1.394(9) |
| C(87A)-H(87B) | 0.9500   |
| C(88A)-H(88B) | 0.9500   |
| C(89)-C(90)   | 1.392(3) |
| C(89)-C(94)   | 1.394(3) |
| C(90)-C(91)   | 1.392(3) |
| C(90)-H(90A)  | 0.9500   |
| C(91)-C(92)   | 1.378(3) |
| C(91)-H(91A)  | 0.9500   |
| C(92)-C(93)   | 1.387(3) |
| C(92)-H(92A)  | 0.9500   |
| C(93)-C(94)   | 1.394(3) |
| C(93)-H(93A)  | 0.9500   |
| C(94)-H(94A)  | 0.9500   |
| C(95)-C(100)  | 1.389(3) |
| C(95)-C(96)   | 1.389(3) |
| C(96)-C(97)   | 1.393(3) |
| C(96)-H(96A)  | 0.9500   |
| C(97)-C(98)   | 1.376(3) |
| C(97)-H(97A)  | 0.9500   |
| C(98)-C(99)   | 1.382(3) |
| C(98)-H(98A)  | 0.9500   |
| C(99)-C(100)  | 1.390(3) |
| C(99)-H(99A)  | 0.9500   |
| C(100)-H(10D) | 0.9500   |
| C(101)-C(106) | 1.383(3) |
| C(101)-C(102) | 1.386(3) |
| C(102)-C(103) | 1.383(3) |
| C(102)-H(10E) | 0.9500   |
| C(103)-C(104) | 1.389(3) |
| C(103)-H(10H) | 0.9500   |
| C(104)-C(105) | 1.385(3) |
| C(104)-H(10C) | 0.9500   |
| C(105)-C(106) | 1.387(3) |
| C(105)-H(10A) | 0.9500   |
| C(106)-H(10B) | 0.9500   |
| C(107)-O(4)   | 1.410(7) |

|                 |           |
|-----------------|-----------|
| C(107)-C(108)   | 1.568(12) |
| C(107)-H(10I)   | 0.9900    |
| C(107)-H(10L)   | 0.9900    |
| C(108)-C(109)   | 1.497(10) |
| C(108)-H(10J)   | 0.9900    |
| C(108)-H(10K)   | 0.9900    |
| C(17A)-O(4)     | 1.463(8)  |
| C(17A)-C(18A)   | 1.484(14) |
| C(17A)-H(10M)   | 0.9900    |
| C(17A)-H(10N)   | 0.9900    |
| C(18A)-C(109)   | 1.542(8)  |
| C(18A)-H(10P)   | 0.9900    |
| C(18A)-H(10Q)   | 0.9900    |
| C(109)-C(110)   | 1.517(3)  |
| C(109)-H(10F)   | 0.9900    |
| C(109)-H(10G)   | 0.9900    |
| C(109)-H(10R)   | 0.9900    |
| C(109)-H(10S)   | 0.9900    |
| C(110)-O(4)     | 1.430(2)  |
| C(110)-H(11A)   | 0.9900    |
| C(110)-H(11B)   | 0.9900    |
| O(10)-C(114)    | 1.425(10) |
| O(10)-C(111)    | 1.445(9)  |
| C(111)-C(112)   | 1.547(11) |
| C(111)-H(11C)   | 0.9900    |
| C(111)-H(11D)   | 0.9900    |
| C(112)-C(113)   | 1.486(11) |
| C(112)-H(11E)   | 0.9900    |
| C(112)-H(11F)   | 0.9900    |
| C(113)-C(114)   | 1.580(11) |
| C(113)-H(11G)   | 0.9900    |
| C(113)-H(11H)   | 0.9900    |
| C(114)-H(11I)   | 0.9900    |
| C(114)-H(11J)   | 0.9900    |
| O(11)-C(115)    | 1.410(10) |
| O(11)-C(118)    | 1.466(10) |
| C(115)-C(116)   | 1.428(10) |
| C(115)-H(11K)   | 0.9900    |
| C(115)-H(11L)   | 0.9900    |
| C(116)-C(117)   | 1.278(12) |
| C(116)-H(11M)   | 0.9900    |
| C(116)-H(11N)   | 0.9900    |
| C(117)-C(118)   | 1.655(12) |
| C(117)-H(11O)   | 0.9900    |
| C(117)-H(11P)   | 0.9900    |
| C(118)-H(11Q)   | 0.9900    |
| C(118)-H(11R)   | 0.9900    |
| <br>            |           |
| N(5)-Fe(1)-N(6) | 176.37(7) |
| N(5)-Fe(1)-N(4) | 91.11(7)  |

|                    |            |
|--------------------|------------|
| N(6)-Fe(1)-N(4)    | 91.02(7)   |
| N(5)-Fe(1)-N(2)    | 89.52(7)   |
| N(6)-Fe(1)-N(2)    | 88.34(7)   |
| N(4)-Fe(1)-N(2)    | 179.36(7)  |
| N(5)-Fe(1)-N(1)    | 92.14(6)   |
| N(6)-Fe(1)-N(1)    | 90.80(7)   |
| N(4)-Fe(1)-N(1)    | 89.83(6)   |
| N(2)-Fe(1)-N(1)    | 90.24(6)   |
| N(5)-Fe(1)-N(3)    | 88.52(7)   |
| N(6)-Fe(1)-N(3)    | 88.54(7)   |
| N(4)-Fe(1)-N(3)    | 90.08(6)   |
| N(2)-Fe(1)-N(3)    | 89.84(6)   |
| N(1)-Fe(1)-N(3)    | 179.33(6)  |
| N(11)-Fe(2)-N(7)   | 94.09(7)   |
| N(11)-Fe(2)-N(9)   | 92.45(7)   |
| N(7)-Fe(2)-N(9)    | 173.45(6)  |
| N(11)-Fe(2)-N(10)  | 96.47(7)   |
| N(7)-Fe(2)-N(10)   | 89.45(6)   |
| N(9)-Fe(2)-N(10)   | 90.21(6)   |
| N(11)-Fe(2)-N(8)   | 86.39(7)   |
| N(7)-Fe(2)-N(8)    | 90.14(6)   |
| N(9)-Fe(2)-N(8)    | 89.87(6)   |
| N(10)-Fe(2)-N(8)   | 177.13(6)  |
| N(11)-Fe(2)-O(4)   | 175.25(6)  |
| N(7)-Fe(2)-O(4)    | 86.67(6)   |
| N(9)-Fe(2)-O(4)    | 86.78(6)   |
| N(10)-Fe(2)-O(4)   | 88.22(6)   |
| N(8)-Fe(2)-O(4)    | 88.92(6)   |
| C(1)-N(1)-C(4)     | 105.60(14) |
| C(1)-N(1)-Fe(1)    | 127.49(13) |
| C(4)-N(1)-Fe(1)    | 126.91(12) |
| C(9)-N(2)-C(6)     | 105.63(15) |
| C(9)-N(2)-Fe(1)    | 127.26(12) |
| C(6)-N(2)-Fe(1)    | 127.06(12) |
| C(14)-N(3)-C(11)   | 105.57(15) |
| C(14)-N(3)-Fe(1)   | 127.21(12) |
| C(11)-N(3)-Fe(1)   | 127.21(13) |
| C(19)-N(4)-C(16)   | 105.83(15) |
| C(19)-N(4)-Fe(1)   | 126.87(12) |
| C(16)-N(4)-Fe(1)   | 127.12(12) |
| O(1)-N(5)-C(45)    | 117.7(2)   |
| O(1)-N(5)-Fe(1)    | 119.88(18) |
| C(45)-N(5)-Fe(1)   | 121.75(13) |
| C(45)-N(5)-H(5NA)  | 106.9      |
| Fe(1)-N(5)-H(5NA)  | 106.9      |
| C(45)-N(5)-H(5NB)  | 106.9      |
| Fe(1)-N(5)-H(5NB)  | 106.9      |
| H(5NA)-N(5)-H(5NB) | 106.7      |
| O(2)-N(6)-C(51)    | 116.3(2)   |
| O(2)-N(6)-Fe(1)    | 118.8(2)   |

|                    |            |
|--------------------|------------|
| C(51)-N(6)-Fe(1)   | 121.79(13) |
| C(51)-N(6)-H(6NA)  | 106.9      |
| Fe(1)-N(6)-H(6NA)  | 106.9      |
| C(51)-N(6)-H(6NB)  | 106.9      |
| Fe(1)-N(6)-H(6NB)  | 106.9      |
| H(6NA)-N(6)-H(6NB) | 106.7      |
| C(60)-N(7)-C(57)   | 105.39(14) |
| C(60)-N(7)-Fe(2)   | 127.09(12) |
| C(57)-N(7)-Fe(2)   | 127.53(12) |
| C(62)-N(8)-C(65)   | 105.93(14) |
| C(62)-N(8)-Fe(2)   | 126.01(12) |
| C(65)-N(8)-Fe(2)   | 127.20(12) |
| C(70)-N(9)-C(67)   | 105.56(14) |
| C(70)-N(9)-Fe(2)   | 127.13(12) |
| C(67)-N(9)-Fe(2)   | 127.32(12) |
| C(72)-N(10)-C(75)  | 105.64(14) |
| C(72)-N(10)-Fe(2)  | 126.51(12) |
| C(75)-N(10)-Fe(2)  | 127.77(12) |
| O(3)-N(11)-C(101)  | 113.46(15) |
| O(3)-N(11)-Fe(2)   | 121.62(13) |
| C(101)-N(11)-Fe(2) | 123.47(12) |
| N(1)-C(1)-C(20)    | 125.83(16) |
| N(1)-C(1)-C(2)     | 110.25(16) |
| C(20)-C(1)-C(2)    | 123.91(16) |
| C(3)-C(2)-C(1)     | 106.89(16) |
| C(3)-C(2)-H(2A)    | 126.6      |
| C(1)-C(2)-H(2A)    | 126.6      |
| C(2)-C(3)-C(4)     | 107.37(17) |
| C(2)-C(3)-H(3A)    | 126.3      |
| C(4)-C(3)-H(3A)    | 126.3      |
| N(1)-C(4)-C(5)     | 126.12(16) |
| N(1)-C(4)-C(3)     | 109.88(16) |
| C(5)-C(4)-C(3)     | 124.00(17) |
| C(4)-C(5)-C(6)     | 123.77(17) |
| C(4)-C(5)-C(21)    | 117.85(16) |
| C(6)-C(5)-C(21)    | 118.38(17) |
| N(2)-C(6)-C(5)     | 125.82(18) |
| N(2)-C(6)-C(7)     | 110.19(16) |
| C(5)-C(6)-C(7)     | 123.99(17) |
| C(8)-C(7)-C(6)     | 106.69(17) |
| C(8)-C(7)-H(7A)    | 126.7      |
| C(6)-C(7)-H(7A)    | 126.7      |
| C(7)-C(8)-C(9)     | 107.23(17) |
| C(7)-C(8)-H(8A)    | 126.4      |
| C(9)-C(8)-H(8A)    | 126.4      |
| N(2)-C(9)-C(10)    | 125.95(17) |
| N(2)-C(9)-C(8)     | 110.24(16) |
| C(10)-C(9)-C(8)    | 123.81(17) |
| C(11)-C(10)-C(9)   | 123.64(17) |
| C(11)-C(10)-C(27)  | 118.21(16) |



|                    |            |
|--------------------|------------|
| C(9)-C(10)-C(27)   | 118.11(17) |
| N(3)-C(11)-C(10)   | 125.98(16) |
| N(3)-C(11)-C(12)   | 110.11(17) |
| C(10)-C(11)-C(12)  | 123.92(17) |
| C(13)-C(12)-C(11)  | 107.06(16) |
| C(13)-C(12)-H(12A) | 126.5      |
| C(11)-C(12)-H(12A) | 126.5      |
| C(12)-C(13)-C(14)  | 107.12(17) |
| C(12)-C(13)-H(13A) | 126.4      |
| C(14)-C(13)-H(13A) | 126.4      |
| N(3)-C(14)-C(15)   | 125.87(16) |
| N(3)-C(14)-C(13)   | 110.10(17) |
| C(15)-C(14)-C(13)  | 124.03(17) |
| C(14)-C(15)-C(16)  | 123.58(18) |
| C(14)-C(15)-C(33)  | 118.07(16) |
| C(16)-C(15)-C(33)  | 118.33(17) |
| N(4)-C(16)-C(15)   | 126.06(18) |
| N(4)-C(16)-C(17)   | 110.00(16) |
| C(15)-C(16)-C(17)  | 123.90(18) |
| C(18)-C(17)-C(16)  | 107.00(18) |
| C(18)-C(17)-H(17A) | 126.5      |
| C(16)-C(17)-H(17A) | 126.5      |
| C(17)-C(18)-C(19)  | 107.03(17) |
| C(17)-C(18)-H(18A) | 126.5      |
| C(19)-C(18)-H(18A) | 126.5      |
| N(4)-C(19)-C(20)   | 126.55(17) |
| N(4)-C(19)-C(18)   | 110.13(16) |
| C(20)-C(19)-C(18)  | 123.31(17) |
| C(1)-C(20)-C(19)   | 123.28(17) |
| C(1)-C(20)-C(39)   | 118.66(16) |
| C(19)-C(20)-C(39)  | 118.06(17) |
| C(26)-C(21)-C(22)  | 118.41(17) |
| C(26)-C(21)-C(5)   | 120.75(17) |
| C(22)-C(21)-C(5)   | 120.83(17) |
| C(23)-C(22)-C(21)  | 120.78(18) |
| C(23)-C(22)-H(22A) | 119.6      |
| C(21)-C(22)-H(22A) | 119.6      |
| C(24)-C(23)-C(22)  | 120.12(18) |
| C(24)-C(23)-H(23A) | 119.9      |
| C(22)-C(23)-H(23A) | 119.9      |
| C(23)-C(24)-C(25)  | 119.62(18) |
| C(23)-C(24)-H(24A) | 120.2      |
| C(25)-C(24)-H(24A) | 120.2      |
| C(24)-C(25)-C(26)  | 120.3(2)   |
| C(24)-C(25)-H(25A) | 119.8      |
| C(26)-C(25)-H(25A) | 119.8      |
| C(25)-C(26)-C(21)  | 120.75(18) |
| C(25)-C(26)-H(26A) | 119.6      |
| C(21)-C(26)-H(26A) | 119.6      |
| C(32)-C(27)-C(28)  | 118.9(4)   |

|                      |            |
|----------------------|------------|
| C(28A)-C(27)-C(32A)  | 117.5(4)   |
| C(32)-C(27)-C(10)    | 121.0(3)   |
| C(28A)-C(27)-C(10)   | 123.9(3)   |
| C(28)-C(27)-C(10)    | 120.2(3)   |
| C(32A)-C(27)-C(10)   | 118.4(3)   |
| C(29)-C(28)-C(27)    | 120.3(5)   |
| C(29)-C(28)-H(28A)   | 119.9      |
| C(27)-C(28)-H(28A)   | 119.9      |
| C(28)-C(29)-C(30)    | 118.9(5)   |
| C(28)-C(29)-H(29A)   | 120.5      |
| C(30)-C(29)-H(29A)   | 120.5      |
| C(27)-C(28A)-C(29A)  | 122.1(5)   |
| C(27)-C(28A)-H(28B)  | 119.0      |
| C(29A)-C(28A)-H(28B) | 119.0      |
| C(30)-C(29A)-C(28A)  | 120.8(5)   |
| C(30)-C(29A)-H(29B)  | 119.6      |
| C(28A)-C(29A)-H(29B) | 119.6      |
| C(29A)-C(30)-C(31A)  | 120.5(4)   |
| C(31)-C(30)-C(29)    | 118.2(4)   |
| C(31)-C(30)-H(30)    | 120.9      |
| C(29)-C(30)-H(30)    | 120.9      |
| C(30)-C(31)-C(32)    | 123.2(7)   |
| C(30)-C(31)-H(31A)   | 118.4      |
| C(32)-C(31)-H(31A)   | 118.4      |
| C(27)-C(32)-C(31)    | 120.6(6)   |
| C(27)-C(32)-H(32A)   | 119.7      |
| C(31)-C(32)-H(32A)   | 119.7      |
| C(32A)-C(31A)-C(30)  | 118.4(6)   |
| C(32A)-C(31A)-H(31B) | 120.8      |
| C(30)-C(31A)-H(31B)  | 120.8      |
| C(31A)-C(32A)-C(27)  | 120.4(6)   |
| C(31A)-C(32A)-H(32B) | 119.8      |
| C(27)-C(32A)-H(32B)  | 119.8      |
| C(38)-C(33)-C(34)    | 118.15(18) |
| C(38)-C(33)-C(15)    | 121.40(17) |
| C(34)-C(33)-C(15)    | 120.45(18) |
| C(35)-C(34)-C(33)    | 120.90(19) |
| C(35)-C(34)-H(34A)   | 119.5      |
| C(33)-C(34)-H(34A)   | 119.5      |
| C(36)-C(35)-C(34)    | 120.46(18) |
| C(36)-C(35)-H(35A)   | 119.8      |
| C(34)-C(35)-H(35A)   | 119.8      |
| C(35)-C(36)-C(37)    | 119.37(18) |
| C(35)-C(36)-H(36A)   | 120.3      |
| C(37)-C(36)-H(36A)   | 120.3      |
| C(36)-C(37)-C(38)    | 120.2(2)   |
| C(36)-C(37)-H(37A)   | 119.9      |
| C(38)-C(37)-H(37A)   | 119.9      |
| C(37)-C(38)-C(33)    | 120.89(19) |
| C(37)-C(38)-H(38A)   | 119.6      |

|                    |            |
|--------------------|------------|
| C(33)-C(38)-H(38A) | 119.6      |
| C(44)-C(39)-C(40)  | 118.92(17) |
| C(44)-C(39)-C(20)  | 120.99(17) |
| C(40)-C(39)-C(20)  | 120.08(17) |
| C(41)-C(40)-C(39)  | 120.67(18) |
| C(41)-C(40)-H(40A) | 119.7      |
| C(39)-C(40)-H(40A) | 119.7      |
| C(42)-C(41)-C(40)  | 119.76(18) |
| C(42)-C(41)-H(41A) | 120.1      |
| C(40)-C(41)-H(41A) | 120.1      |
| C(43)-C(42)-C(41)  | 120.04(18) |
| C(43)-C(42)-H(42A) | 120.0      |
| C(41)-C(42)-H(42A) | 120.0      |
| C(42)-C(43)-C(44)  | 120.24(19) |
| C(42)-C(43)-H(43A) | 119.9      |
| C(44)-C(43)-H(43A) | 119.9      |
| C(39)-C(44)-C(43)  | 120.34(18) |
| C(39)-C(44)-H(44A) | 119.8      |
| C(43)-C(44)-H(44A) | 119.8      |
| C(46)-C(45)-C(50)  | 120.50(19) |
| C(46)-C(45)-N(5)   | 119.20(18) |
| C(50)-C(45)-N(5)   | 120.30(18) |
| C(45)-C(46)-C(47)  | 120.0(2)   |
| C(45)-C(46)-H(46A) | 120.0      |
| C(47)-C(46)-H(46A) | 120.0      |
| C(46)-C(47)-C(48)  | 120.0(2)   |
| C(46)-C(47)-H(47A) | 120.0      |
| C(48)-C(47)-H(47A) | 120.0      |
| C(49)-C(48)-C(47)  | 119.8(2)   |
| C(49)-C(48)-H(48A) | 120.1      |
| C(47)-C(48)-H(48A) | 120.1      |
| C(48)-C(49)-C(50)  | 120.6(2)   |
| C(48)-C(49)-H(49A) | 119.7      |
| C(50)-C(49)-H(49A) | 119.7      |
| C(49)-C(50)-C(45)  | 119.2(2)   |
| C(49)-C(50)-H(50A) | 120.4      |
| C(45)-C(50)-H(50A) | 120.4      |
| C(52)-C(51)-C(56)  | 120.65(19) |
| C(52)-C(51)-N(6)   | 119.19(19) |
| C(56)-C(51)-N(6)   | 120.13(18) |
| C(51)-C(52)-C(53)  | 119.0(2)   |
| C(51)-C(52)-H(52A) | 120.5      |
| C(53)-C(52)-H(52A) | 120.5      |
| C(54)-C(53)-C(52)  | 120.7(2)   |
| C(54)-C(53)-H(53A) | 119.7      |
| C(52)-C(53)-H(53A) | 119.7      |
| C(55)-C(54)-C(53)  | 119.9(2)   |
| C(55)-C(54)-H(54A) | 120.0      |
| C(53)-C(54)-H(54A) | 120.0      |
| C(54)-C(55)-C(56)  | 120.1(2)   |

|                    |            |
|--------------------|------------|
| C(54)-C(55)-H(55A) | 119.9      |
| C(56)-C(55)-H(55A) | 119.9      |
| C(51)-C(56)-C(55)  | 119.7(2)   |
| C(51)-C(56)-H(56A) | 120.2      |
| C(55)-C(56)-H(56A) | 120.2      |
| N(7)-C(57)-C(76)   | 125.89(16) |
| N(7)-C(57)-C(58)   | 110.31(15) |
| C(76)-C(57)-C(58)  | 123.71(16) |
| C(59)-C(58)-C(57)  | 106.79(16) |
| C(59)-C(58)-H(58A) | 126.6      |
| C(57)-C(58)-H(58A) | 126.6      |
| C(58)-C(59)-C(60)  | 106.97(16) |
| C(58)-C(59)-H(59A) | 126.5      |
| C(60)-C(59)-H(59A) | 126.5      |
| N(7)-C(60)-C(61)   | 125.69(16) |
| N(7)-C(60)-C(59)   | 110.53(15) |
| C(61)-C(60)-C(59)  | 123.76(16) |
| C(62)-C(61)-C(60)  | 123.67(16) |
| C(62)-C(61)-C(77)  | 117.27(16) |
| C(60)-C(61)-C(77)  | 119.06(16) |
| N(8)-C(62)-C(61)   | 126.08(16) |
| N(8)-C(62)-C(63)   | 109.77(15) |
| C(61)-C(62)-C(63)  | 124.13(16) |
| C(64)-C(63)-C(62)  | 107.38(16) |
| C(64)-C(63)-H(63A) | 126.3      |
| C(62)-C(63)-H(63A) | 126.3      |
| C(63)-C(64)-C(65)  | 106.91(16) |
| C(63)-C(64)-H(64A) | 126.5      |
| C(65)-C(64)-H(64A) | 126.5      |
| N(8)-C(65)-C(66)   | 125.41(16) |
| N(8)-C(65)-C(64)   | 109.98(16) |
| C(66)-C(65)-C(64)  | 124.60(16) |
| C(65)-C(66)-C(67)  | 123.81(17) |
| C(65)-C(66)-C(83)  | 119.1(9)   |
| C(67)-C(66)-C(83)  | 116.7(8)   |
| C(65)-C(66)-C(83A) | 115.3(8)   |
| C(67)-C(66)-C(83A) | 120.7(8)   |
| N(9)-C(67)-C(66)   | 125.72(16) |
| N(9)-C(67)-C(68)   | 110.16(16) |
| C(66)-C(67)-C(68)  | 124.08(17) |
| C(69)-C(68)-C(67)  | 107.06(17) |
| C(69)-C(68)-H(68A) | 126.5      |
| C(67)-C(68)-H(68A) | 126.5      |
| C(68)-C(69)-C(70)  | 107.00(17) |
| C(68)-C(69)-H(69A) | 126.5      |
| C(70)-C(69)-H(69A) | 126.5      |
| N(9)-C(70)-C(71)   | 125.71(16) |
| N(9)-C(70)-C(69)   | 110.22(16) |
| C(71)-C(70)-C(69)  | 124.02(17) |
| C(70)-C(71)-C(72)  | 123.81(16) |

|                    |            |
|--------------------|------------|
| C(70)-C(71)-C(89)  | 118.35(15) |
| C(72)-C(71)-C(89)  | 117.69(16) |
| N(10)-C(72)-C(71)  | 125.65(16) |
| N(10)-C(72)-C(73)  | 110.00(15) |
| C(71)-C(72)-C(73)  | 124.07(16) |
| C(74)-C(73)-C(72)  | 107.14(16) |
| C(74)-C(73)-H(73A) | 126.4      |
| C(72)-C(73)-H(73A) | 126.4      |
| C(73)-C(74)-C(75)  | 107.00(16) |
| C(73)-C(74)-H(74A) | 126.5      |
| C(75)-C(74)-H(74A) | 126.5      |
| N(10)-C(75)-C(76)  | 125.48(16) |
| N(10)-C(75)-C(74)  | 110.16(15) |
| C(76)-C(75)-C(74)  | 124.36(16) |
| C(75)-C(76)-C(57)  | 123.48(16) |
| C(75)-C(76)-C(95)  | 118.80(16) |
| C(57)-C(76)-C(95)  | 117.72(16) |
| C(78)-C(77)-C(82)  | 118.89(17) |
| C(78)-C(77)-C(61)  | 120.21(17) |
| C(82)-C(77)-C(61)  | 120.85(18) |
| C(77)-C(78)-C(79)  | 120.83(19) |
| C(77)-C(78)-H(78A) | 119.6      |
| C(79)-C(78)-H(78A) | 119.6      |
| C(80)-C(79)-C(78)  | 119.8(2)   |
| C(80)-C(79)-H(79A) | 120.1      |
| C(78)-C(79)-H(79A) | 120.1      |
| C(81)-C(80)-C(79)  | 119.85(18) |
| C(81)-C(80)-H(80A) | 120.1      |
| C(79)-C(80)-H(80A) | 120.1      |
| C(80)-C(81)-C(82)  | 120.44(19) |
| C(80)-C(81)-H(81A) | 119.8      |
| C(82)-C(81)-H(81A) | 119.8      |
| C(81)-C(82)-C(77)  | 120.2(2)   |
| C(81)-C(82)-H(82A) | 119.9      |
| C(77)-C(82)-H(82A) | 119.9      |
| C(84)-C(83)-C(88)  | 119.4(7)   |
| C(84)-C(83)-C(66)  | 118.2(8)   |
| C(88)-C(83)-C(66)  | 122.4(8)   |
| C(83)-C(84)-C(85)  | 120.4(7)   |
| C(83)-C(84)-H(84A) | 119.8      |
| C(85)-C(84)-H(84A) | 119.8      |
| C(86)-C(85)-C(84)  | 118.9(7)   |
| C(86)-C(85)-H(85A) | 120.6      |
| C(84)-C(85)-H(85A) | 120.6      |
| C(87)-C(86)-C(85)  | 120.8(6)   |
| C(87)-C(86)-H(86A) | 119.6      |
| C(85)-C(86)-H(86A) | 119.6      |
| C(86)-C(87)-C(88)  | 120.6(7)   |
| C(86)-C(87)-H(87A) | 119.7      |
| C(88)-C(87)-H(87A) | 119.7      |

|                      |            |
|----------------------|------------|
| C(87)-C(88)-C(83)    | 119.8(7)   |
| C(87)-C(88)-H(88A)   | 120.1      |
| C(83)-C(88)-H(88A)   | 120.1      |
| C(88A)-C(83A)-C(84A) | 118.1(7)   |
| C(88A)-C(83A)-C(66)  | 118.1(8)   |
| C(84A)-C(83A)-C(66)  | 123.6(8)   |
| C(85A)-C(84A)-C(83A) | 119.8(7)   |
| C(85A)-C(84A)-H(84B) | 120.1      |
| C(83A)-C(84A)-H(84B) | 120.1      |
| C(86A)-C(85A)-C(84A) | 121.5(7)   |
| C(86A)-C(85A)-H(85B) | 119.3      |
| C(84A)-C(85A)-H(85B) | 119.3      |
| C(85A)-C(86A)-C(87A) | 119.8(6)   |
| C(85A)-C(86A)-H(86B) | 120.1      |
| C(87A)-C(86A)-H(86B) | 120.1      |
| C(86A)-C(87A)-C(88A) | 118.6(7)   |
| C(86A)-C(87A)-H(87B) | 120.7      |
| C(88A)-C(87A)-H(87B) | 120.7      |
| C(83A)-C(88A)-C(87A) | 122.3(7)   |
| C(83A)-C(88A)-H(88B) | 118.9      |
| C(87A)-C(88A)-H(88B) | 118.9      |
| C(90)-C(89)-C(94)    | 118.61(17) |
| C(90)-C(89)-C(71)    | 119.70(17) |
| C(94)-C(89)-C(71)    | 121.70(16) |
| C(89)-C(90)-C(91)    | 120.89(19) |
| C(89)-C(90)-H(90A)   | 119.6      |
| C(91)-C(90)-H(90A)   | 119.6      |
| C(92)-C(91)-C(90)    | 120.08(18) |
| C(92)-C(91)-H(91A)   | 120.0      |
| C(90)-C(91)-H(91A)   | 120.0      |
| C(91)-C(92)-C(93)    | 119.79(18) |
| C(91)-C(92)-H(92A)   | 120.1      |
| C(93)-C(92)-H(92A)   | 120.1      |
| C(92)-C(93)-C(94)    | 120.26(19) |
| C(92)-C(93)-H(93A)   | 119.9      |
| C(94)-C(93)-H(93A)   | 119.9      |
| C(93)-C(94)-C(89)    | 120.37(18) |
| C(93)-C(94)-H(94A)   | 119.8      |
| C(89)-C(94)-H(94A)   | 119.8      |
| C(100)-C(95)-C(96)   | 118.80(17) |
| C(100)-C(95)-C(76)   | 121.15(17) |
| C(96)-C(95)-C(76)    | 120.03(17) |
| C(95)-C(96)-C(97)    | 120.5(2)   |
| C(95)-C(96)-H(96A)   | 119.8      |
| C(97)-C(96)-H(96A)   | 119.8      |
| C(98)-C(97)-C(96)    | 120.3(2)   |
| C(98)-C(97)-H(97A)   | 119.9      |
| C(96)-C(97)-H(97A)   | 119.9      |
| C(97)-C(98)-C(99)    | 119.68(18) |
| C(97)-C(98)-H(98A)   | 120.2      |

|                      |            |
|----------------------|------------|
| C(99)-C(98)-H(98A)   | 120.2      |
| C(98)-C(99)-C(100)   | 120.3(2)   |
| C(98)-C(99)-H(99A)   | 119.9      |
| C(100)-C(99)-H(99A)  | 119.9      |
| C(95)-C(100)-C(99)   | 120.4(2)   |
| C(95)-C(100)-H(10D)  | 119.8      |
| C(99)-C(100)-H(10D)  | 119.8      |
| C(106)-C(101)-C(102) | 121.59(18) |
| C(106)-C(101)-N(11)  | 121.03(16) |
| C(102)-C(101)-N(11)  | 117.38(16) |
| C(103)-C(102)-C(101) | 118.81(18) |
| C(103)-C(102)-H(10E) | 120.6      |
| C(101)-C(102)-H(10E) | 120.6      |
| C(102)-C(103)-C(104) | 120.53(18) |
| C(102)-C(103)-H(10H) | 119.7      |
| C(104)-C(103)-H(10H) | 119.7      |
| C(105)-C(104)-C(103) | 119.71(18) |
| C(105)-C(104)-H(10C) | 120.1      |
| C(103)-C(104)-H(10C) | 120.1      |
| C(104)-C(105)-C(106) | 120.50(18) |
| C(104)-C(105)-H(10A) | 119.7      |
| C(106)-C(105)-H(10A) | 119.7      |
| C(101)-C(106)-C(105) | 118.83(18) |
| C(101)-C(106)-H(10B) | 120.6      |
| C(105)-C(106)-H(10B) | 120.6      |
| O(4)-C(107)-C(108)   | 102.1(5)   |
| O(4)-C(107)-H(10I)   | 111.4      |
| C(108)-C(107)-H(10I) | 111.4      |
| O(4)-C(107)-H(10L)   | 111.4      |
| C(108)-C(107)-H(10L) | 111.4      |
| H(10I)-C(107)-H(10L) | 109.2      |
| C(109)-C(108)-C(107) | 99.6(5)    |
| C(109)-C(108)-H(10J) | 111.9      |
| C(107)-C(108)-H(10J) | 111.9      |
| C(109)-C(108)-H(10K) | 111.9      |
| C(107)-C(108)-H(10K) | 111.9      |
| H(10J)-C(108)-H(10K) | 109.6      |
| O(4)-C(17A)-C(18A)   | 105.8(6)   |
| O(4)-C(17A)-H(10M)   | 110.6      |
| C(18A)-C(17A)-H(10M) | 110.6      |
| O(4)-C(17A)-H(10N)   | 110.6      |
| C(18A)-C(17A)-H(10N) | 110.6      |
| H(10M)-C(17A)-H(10N) | 108.7      |
| C(17A)-C(18A)-C(109) | 104.5(6)   |
| C(17A)-C(18A)-H(10P) | 110.9      |
| C(109)-C(18A)-H(10P) | 110.9      |
| C(17A)-C(18A)-H(10Q) | 110.9      |
| C(109)-C(18A)-H(10Q) | 110.9      |
| H(10P)-C(18A)-H(10Q) | 108.9      |
| C(108)-C(109)-C(110) | 103.3(4)   |

|                      |            |
|----------------------|------------|
| C(110)-C(109)-C(18A) | 105.8(3)   |
| C(108)-C(109)-H(10F) | 111.1      |
| C(110)-C(109)-H(10F) | 111.1      |
| C(108)-C(109)-H(10G) | 111.1      |
| C(110)-C(109)-H(10G) | 111.1      |
| H(10F)-C(109)-H(10G) | 109.1      |
| C(110)-C(109)-H(10R) | 110.6      |
| C(18A)-C(109)-H(10R) | 110.6      |
| C(110)-C(109)-H(10S) | 110.6      |
| C(18A)-C(109)-H(10S) | 110.6      |
| H(10R)-C(109)-H(10S) | 108.7      |
| O(4)-C(110)-C(109)   | 106.67(18) |
| O(4)-C(110)-H(11A)   | 110.4      |
| C(109)-C(110)-H(11A) | 110.4      |
| O(4)-C(110)-H(11B)   | 110.4      |
| C(109)-C(110)-H(11B) | 110.4      |
| H(11A)-C(110)-H(11B) | 108.6      |
| C(107)-O(4)-C(110)   | 109.0(3)   |
| C(110)-O(4)-C(17A)   | 110.2(4)   |
| C(107)-O(4)-Fe(2)    | 124.9(3)   |
| C(110)-O(4)-Fe(2)    | 126.00(12) |
| C(17A)-O(4)-Fe(2)    | 121.1(4)   |
| C(114)-O(10)-C(111)  | 106.8(6)   |
| O(10)-C(111)-C(112)  | 102.1(7)   |
| O(10)-C(111)-H(11C)  | 111.3      |
| C(112)-C(111)-H(11C) | 111.3      |
| O(10)-C(111)-H(11D)  | 111.3      |
| C(112)-C(111)-H(11D) | 111.3      |
| H(11C)-C(111)-H(11D) | 109.2      |
| C(113)-C(112)-C(111) | 108.6(7)   |
| C(113)-C(112)-H(11E) | 110.0      |
| C(111)-C(112)-H(11E) | 110.0      |
| C(113)-C(112)-H(11F) | 110.0      |
| C(111)-C(112)-H(11F) | 110.0      |
| H(11E)-C(112)-H(11F) | 108.4      |
| C(112)-C(113)-C(114) | 95.2(7)    |
| C(112)-C(113)-H(11G) | 112.7      |
| C(114)-C(113)-H(11G) | 112.7      |
| C(112)-C(113)-H(11H) | 112.7      |
| C(114)-C(113)-H(11H) | 112.7      |
| H(11G)-C(113)-H(11H) | 110.2      |
| O(10)-C(114)-C(113)  | 113.1(8)   |
| O(10)-C(114)-H(11I)  | 109.0      |
| C(113)-C(114)-H(11I) | 109.0      |
| O(10)-C(114)-H(11J)  | 109.0      |
| C(113)-C(114)-H(11J) | 109.0      |
| H(11I)-C(114)-H(11J) | 107.8      |
| C(115)-O(11)-C(118)  | 111.8(8)   |
| O(11)-C(115)-C(116)  | 106.5(8)   |
| O(11)-C(115)-H(11K)  | 110.4      |



|                      |          |
|----------------------|----------|
| C(116)-C(115)-H(11K) | 110.4    |
| O(11)-C(115)-H(11L)  | 110.4    |
| C(116)-C(115)-H(11L) | 110.4    |
| H(11K)-C(115)-H(11L) | 108.6    |
| C(117)-C(116)-C(115) | 109.8(9) |
| C(117)-C(116)-H(11M) | 109.7    |
| C(115)-C(116)-H(11M) | 109.7    |
| C(117)-C(116)-H(11N) | 109.7    |
| C(115)-C(116)-H(11N) | 109.7    |
| H(11M)-C(116)-H(11N) | 108.2    |
| C(116)-C(117)-C(118) | 110.5(7) |
| C(116)-C(117)-H(11O) | 109.6    |
| C(118)-C(117)-H(11O) | 109.6    |
| C(116)-C(117)-H(11P) | 109.6    |
| C(118)-C(117)-H(11P) | 109.6    |
| H(11O)-C(117)-H(11P) | 108.1    |
| O(11)-C(118)-C(117)  | 96.1(6)  |
| O(11)-C(118)-H(11Q)  | 112.5    |
| C(117)-C(118)-H(11Q) | 112.5    |
| O(11)-C(118)-H(11R)  | 112.5    |
| C(117)-C(118)-H(11R) | 112.5    |
| H(11Q)-C(118)-H(11R) | 110.0    |

**Table S4.** Anisotropic displacement parameters ( $\text{\AA}^2 \times 10^3$ ) for  $[\text{Fe}(\text{TPP})(\text{THF})(\text{PhNO})]$  and  $[\text{Fe}(\text{TPP})(\text{PhNH}_2)(\text{PhNO})]$ . The anisotropic displacement factor exponent takes the form:  $-2\pi^2[\text{h}^2\text{a}^2\text{U11} + \dots + 2\text{hka}*\text{b}*\text{U12}]$ .

|       | U11   | U22   | U33   | U23   | U13   | U12   |
|-------|-------|-------|-------|-------|-------|-------|
| Fe(1) | 19(1) | 23(1) | 15(1) | 3(1)  | 8(1)  | 9(1)  |
| Fe(2) | 16(1) | 19(1) | 13(1) | 0(1)  | 5(1)  | 4(1)  |
| O(1)  | 30(1) | 27(1) | 25(1) | -5(1) | 13(1) | 11(1) |
| O(2)  | 26(1) | 33(2) | 36(2) | 6(1)  | 14(1) | 7(1)  |
| N(1)  | 19(1) | 22(1) | 17(1) | 1(1)  | 7(1)  | 7(1)  |
| N(2)  | 22(1) | 26(1) | 16(1) | 2(1)  | 8(1)  | 10(1) |
| N(3)  | 21(1) | 26(1) | 17(1) | 3(1)  | 7(1)  | 9(1)  |
| N(4)  | 22(1) | 23(1) | 15(1) | 1(1)  | 7(1)  | 9(1)  |
| N(5)  | 28(1) | 43(1) | 19(1) | 4(1)  | 10(1) | 19(1) |
| N(6)  | 25(1) | 51(1) | 21(1) | 0(1)  | 9(1)  | 17(1) |
| N(7)  | 17(1) | 20(1) | 15(1) | 0(1)  | 4(1)  | 5(1)  |
| N(8)  | 19(1) | 20(1) | 15(1) | -2(1) | 4(1)  | 4(1)  |
| N(9)  | 18(1) | 24(1) | 15(1) | 0(1)  | 5(1)  | 6(1)  |

|        |       |       |       |        |       |       |
|--------|-------|-------|-------|--------|-------|-------|
| N(10)  | 18(1) | 19(1) | 13(1) | 0(1)   | 5(1)  | 4(1)  |
| N(11)  | 19(1) | 24(1) | 19(1) | -2(1)  | 6(1)  | 5(1)  |
| C(1)   | 20(1) | 23(1) | 16(1) | 1(1)   | 8(1)  | 6(1)  |
| C(2)   | 23(1) | 29(1) | 18(1) | 2(1)   | 9(1)  | 10(1) |
| C(3)   | 23(1) | 29(1) | 18(1) | 5(1)   | 9(1)  | 9(1)  |
| C(4)   | 22(1) | 22(1) | 16(1) | 2(1)   | 6(1)  | 7(1)  |
| C(5)   | 22(1) | 23(1) | 19(1) | 2(1)   | 8(1)  | 8(1)  |
| C(6)   | 23(1) | 27(1) | 18(1) | 3(1)   | 8(1)  | 11(1) |
| C(7)   | 27(1) | 37(1) | 21(1) | 5(1)   | 8(1)  | 18(1) |
| C(8)   | 26(1) | 37(1) | 21(1) | 4(1)   | 10(1) | 17(1) |
| C(9)   | 21(1) | 25(1) | 18(1) | 1(1)   | 8(1)  | 8(1)  |
| C(10)  | 20(1) | 24(1) | 18(1) | 1(1)   | 8(1)  | 6(1)  |
| C(11)  | 20(1) | 28(1) | 16(1) | 1(1)   | 8(1)  | 6(1)  |
| C(12)  | 25(1) | 35(1) | 17(1) | 3(1)   | 9(1)  | 11(1) |
| C(13)  | 24(1) | 34(1) | 18(1) | 7(1)   | 9(1)  | 11(1) |
| C(14)  | 24(1) | 25(1) | 16(1) | 3(1)   | 7(1)  | 9(1)  |
| C(15)  | 23(1) | 23(1) | 19(1) | 3(1)   | 8(1)  | 8(1)  |
| C(16)  | 25(1) | 26(1) | 19(1) | 3(1)   | 9(1)  | 12(1) |
| C(17)  | 34(1) | 44(1) | 20(1) | 7(1)   | 10(1) | 25(1) |
| C(18)  | 32(1) | 42(1) | 21(1) | 6(1)   | 12(1) | 23(1) |
| C(19)  | 24(1) | 26(1) | 18(1) | 2(1)   | 8(1)  | 11(1) |
| C(20)  | 21(1) | 23(1) | 17(1) | 0(1)   | 7(1)  | 7(1)  |
| C(21)  | 20(1) | 27(1) | 18(1) | 4(1)   | 9(1)  | 9(1)  |
| C(22)  | 21(1) | 26(1) | 20(1) | 3(1)   | 9(1)  | 10(1) |
| C(23)  | 22(1) | 34(1) | 17(1) | 2(1)   | 6(1)  | 9(1)  |
| C(24)  | 28(1) | 34(1) | 24(1) | 9(1)   | 7(1)  | 14(1) |
| C(25)  | 37(1) | 28(1) | 28(1) | 6(1)   | 7(1)  | 16(1) |
| C(26)  | 31(1) | 28(1) | 22(1) | 1(1)   | 6(1)  | 12(1) |
| C(27)  | 21(1) | 28(1) | 15(1) | 2(1)   | 6(1)  | 11(1) |
| C(28)  | 31(3) | 31(3) | 29(3) | -8(2)  | 16(2) | 1(2)  |
| C(29)  | 26(3) | 39(3) | 32(3) | -5(2)  | 15(2) | 3(2)  |
| C(28A) | 23(2) | 30(3) | 21(3) | -5(2)  | 5(2)  | 6(2)  |
| C(29A) | 26(2) | 35(3) | 31(3) | 3(2)   | 15(2) | 11(2) |
| C(30)  | 36(1) | 51(1) | 23(1) | -1(1)  | 14(1) | 23(1) |
| C(31)  | 53(5) | 30(3) | 30(4) | 0(3)   | 21(3) | 18(3) |
| C(32)  | 35(4) | 26(2) | 35(4) | 7(3)   | 19(3) | 11(2) |
| C(31A) | 41(4) | 46(4) | 28(4) | -22(3) | 9(3)  | 9(3)  |
| C(32A) | 26(3) | 40(4) | 33(4) | -14(3) | 6(3)  | 6(2)  |
| C(33)  | 21(1) | 28(1) | 19(1) | 4(1)   | 9(1)  | 9(1)  |
| C(34)  | 21(1) | 26(1) | 22(1) | 2(1)   | 9(1)  | 7(1)  |
| C(35)  | 18(1) | 36(1) | 18(1) | 0(1)   | 6(1)  | 7(1)  |
| C(36)  | 22(1) | 38(1) | 23(1) | 10(1)  | 5(1)  | 9(1)  |
| C(37)  | 32(1) | 28(1) | 31(1) | 7(1)   | 3(1)  | 12(1) |
| C(38)  | 29(1) | 28(1) | 22(1) | 1(1)   | 3(1)  | 10(1) |
| C(39)  | 21(1) | 29(1) | 16(1) | 2(1)   | 6(1)  | 12(1) |
| C(40)  | 24(1) | 28(1) | 21(1) | -1(1)  | 7(1)  | 10(1) |
| C(41)  | 22(1) | 32(1) | 21(1) | 2(1)   | 7(1)  | 8(1)  |
| C(42)  | 25(1) | 39(1) | 18(1) | 0(1)   | 10(1) | 14(1) |
| C(43)  | 33(1) | 30(1) | 24(1) | 0(1)   | 11(1) | 14(1) |
| C(44)  | 28(1) | 28(1) | 23(1) | 3(1)   | 10(1) | 11(1) |

|        |       |       |       |        |       |       |
|--------|-------|-------|-------|--------|-------|-------|
| C(45)  | 26(1) | 30(1) | 23(1) | -1(1)  | 9(1)  | 11(1) |
| C(46)  | 29(1) | 29(1) | 26(1) | 1(1)   | 6(1)  | 10(1) |
| C(47)  | 26(1) | 31(1) | 38(1) | 0(1)   | 4(1)  | 10(1) |
| C(48)  | 27(1) | 25(1) | 43(1) | -2(1)  | 13(1) | 6(1)  |
| C(49)  | 37(1) | 24(1) | 31(1) | 1(1)   | 15(1) | 8(1)  |
| C(50)  | 31(1) | 33(1) | 23(1) | 1(1)   | 9(1)  | 13(1) |
| C(51)  | 29(1) | 30(1) | 20(1) | -1(1)  | 7(1)  | 8(1)  |
| C(52)  | 26(1) | 28(1) | 25(1) | 2(1)   | 3(1)  | 2(1)  |
| C(53)  | 33(1) | 36(1) | 22(1) | 3(1)   | 4(1)  | -5(1) |
| C(54)  | 42(1) | 28(1) | 32(1) | -5(1)  | 19(1) | -2(1) |
| C(55)  | 43(1) | 26(1) | 42(1) | 5(1)   | 23(1) | 9(1)  |
| C(56)  | 38(1) | 40(1) | 28(1) | 7(1)   | 16(1) | 17(1) |
| C(57)  | 19(1) | 20(1) | 13(1) | -1(1)  | 4(1)  | 5(1)  |
| C(58)  | 24(1) | 25(1) | 15(1) | -2(1)  | 5(1)  | 7(1)  |
| C(59)  | 21(1) | 28(1) | 17(1) | 0(1)   | 7(1)  | 7(1)  |
| C(60)  | 20(1) | 20(1) | 16(1) | 0(1)   | 6(1)  | 6(1)  |
| C(61)  | 21(1) | 22(1) | 18(1) | 4(1)   | 7(1)  | 7(1)  |
| C(62)  | 17(1) | 21(1) | 18(1) | 1(1)   | 4(1)  | 4(1)  |
| C(63)  | 18(1) | 24(1) | 23(1) | 0(1)   | 6(1)  | 3(1)  |
| C(64)  | 21(1) | 23(1) | 22(1) | -2(1)  | 3(1)  | 5(1)  |
| C(65)  | 20(1) | 21(1) | 17(1) | -2(1)  | 1(1)  | 5(1)  |
| C(66)  | 22(1) | 27(1) | 18(1) | -3(1)  | 4(1)  | 10(1) |
| C(67)  | 23(1) | 28(1) | 14(1) | -3(1)  | 3(1)  | 9(1)  |
| C(68)  | 25(1) | 44(1) | 16(1) | -5(1)  | 5(1)  | 12(1) |
| C(69)  | 26(1) | 38(1) | 17(1) | 0(1)   | 9(1)  | 12(1) |
| C(70)  | 22(1) | 24(1) | 16(1) | 1(1)   | 7(1)  | 8(1)  |
| C(71)  | 21(1) | 22(1) | 17(1) | 3(1)   | 8(1)  | 8(1)  |
| C(72)  | 18(1) | 20(1) | 17(1) | 2(1)   | 6(1)  | 6(1)  |
| C(73)  | 18(1) | 24(1) | 20(1) | 3(1)   | 7(1)  | 6(1)  |
| C(74)  | 18(1) | 22(1) | 19(1) | 1(1)   | 4(1)  | 4(1)  |
| C(75)  | 16(1) | 20(1) | 15(1) | 1(1)   | 3(1)  | 3(1)  |
| C(76)  | 20(1) | 22(1) | 16(1) | 2(1)   | 4(1)  | 6(1)  |
| C(77)  | 20(1) | 23(1) | 17(1) | -2(1)  | 6(1)  | 2(1)  |
| C(78)  | 23(1) | 31(1) | 21(1) | 2(1)   | 7(1)  | 6(1)  |
| C(79)  | 21(1) | 37(1) | 27(1) | -2(1)  | 8(1)  | 7(1)  |
| C(80)  | 25(1) | 30(1) | 27(1) | -4(1)  | 13(1) | -1(1) |
| C(81)  | 35(1) | 27(1) | 25(1) | 4(1)   | 17(1) | 5(1)  |
| C(82)  | 28(1) | 28(1) | 24(1) | 3(1)   | 11(1) | 9(1)  |
| C(83)  | 19(3) | 27(4) | 17(3) | -4(2)  | 4(2)  | 9(3)  |
| C(84)  | 26(3) | 31(4) | 23(3) | 2(2)   | 6(3)  | 13(3) |
| C(85)  | 30(3) | 35(4) | 24(4) | -10(3) | 2(3)  | 11(3) |
| C(86)  | 27(3) | 43(5) | 19(2) | -8(3)  | 3(2)  | 14(3) |
| C(87)  | 30(3) | 42(4) | 20(2) | -4(3)  | 3(2)  | 11(3) |
| C(88)  | 25(3) | 24(4) | 13(2) | -1(3)  | 1(2)  | 5(3)  |
| C(83A) | 21(3) | 28(4) | 19(3) | -5(3)  | 4(2)  | 12(3) |
| C(84A) | 23(3) | 25(4) | 22(3) | -8(2)  | 4(3)  | 7(2)  |
| C(85A) | 26(3) | 34(4) | 30(4) | -15(2) | 0(3)  | 12(3) |
| C(86A) | 25(3) | 40(4) | 24(3) | -15(3) | 0(2)  | 12(3) |
| C(87A) | 37(3) | 40(5) | 16(2) | -12(3) | -1(2) | 16(4) |
| C(88A) | 28(3) | 26(4) | 25(3) | -5(3)  | 7(2)  | 8(3)  |

|        |         |         |        |        |        |         |
|--------|---------|---------|--------|--------|--------|---------|
| C(89)  | 20(1)   | 24(1)   | 15(1)  | -1(1)  | 6(1)   | 6(1)    |
| C(90)  | 28(1)   | 26(1)   | 24(1)  | 4(1)   | 11(1)  | 11(1)   |
| C(91)  | 30(1)   | 29(1)   | 23(1)  | 4(1)   | 12(1)  | 5(1)    |
| C(92)  | 21(1)   | 35(1)   | 19(1)  | -4(1)  | 7(1)   | 4(1)    |
| C(93)  | 21(1)   | 33(1)   | 21(1)  | -3(1)  | 4(1)   | 10(1)   |
| C(94)  | 23(1)   | 27(1)   | 18(1)  | 2(1)   | 4(1)   | 8(1)    |
| C(95)  | 18(1)   | 23(1)   | 18(1)  | -1(1)  | 6(1)   | 4(1)    |
| C(96)  | 39(1)   | 25(1)   | 27(1)  | 1(1)   | -2(1)  | 5(1)    |
| C(97)  | 42(1)   | 22(1)   | 36(1)  | -7(1)  | 1(1)   | 4(1)    |
| C(98)  | 23(1)   | 34(1)   | 24(1)  | -10(1) | 5(1)   | -1(1)   |
| C(99)  | 29(1)   | 39(1)   | 20(1)  | -3(1)  | 2(1)   | 10(1)   |
| C(100) | 33(1)   | 28(1)   | 23(1)  | -2(1)  | 2(1)   | 11(1)   |
| C(101) | 22(1)   | 24(1)   | 19(1)  | 2(1)   | 6(1)   | 9(1)    |
| C(102) | 25(1)   | 27(1)   | 24(1)  | 2(1)   | 4(1)   | 5(1)    |
| C(103) | 30(1)   | 30(1)   | 27(1)  | 6(1)   | 10(1)  | 5(1)    |
| C(104) | 35(1)   | 31(1)   | 20(1)  | 5(1)   | 5(1)   | 10(1)   |
| C(105) | 28(1)   | 25(1)   | 25(1)  | 1(1)   | 1(1)   | 9(1)    |
| C(106) | 23(1)   | 22(1)   | 27(1)  | 2(1)   | 5(1)   | 6(1)    |
| C(107) | 28(3)   | 22(2)   | 22(3)  | -3(2)  | -6(2)  | 8(2)    |
| C(108) | 49(5)   | 39(3)   | 42(3)  | 17(2)  | 0(3)   | 14(4)   |
| C(17A) | 62(6)   | 40(3)   | 25(3)  | 4(2)   | -5(3)  | 22(3)   |
| C(18A) | 38(4)   | 30(3)   | 29(3)  | 3(2)   | -2(3)  | 12(3)   |
| C(109) | 31(1)   | 28(1)   | 44(1)  | 7(1)   | 1(1)   | 6(1)    |
| C(110) | 48(1)   | 22(1)   | 44(1)  | -1(1)  | -10(1) | 6(1)    |
| O(3)   | 38(1)   | 24(1)   | 24(1)  | -2(1)  | 9(1)   | 9(1)    |
| O(4)   | 26(1)   | 21(1)   | 20(1)  | 1(1)   | 2(1)   | 6(1)    |
| O(10)  | 108(4)  | 97(4)   | 60(3)  | 0(3)   | 4(3)   | 25(3)   |
| C(111) | 89(5)   | 146(9)  | 66(4)  | -21(5) | -3(4)  | 44(5)   |
| C(112) | 109(5)  | 59(4)   | 49(4)  | -11(3) | -7(3)  | 45(4)   |
| C(113) | 99(6)   | 141(9)  | 72(5)  | 8(5)   | -31(4) | 62(6)   |
| C(114) | 92(6)   | 159(11) | 82(5)  | -18(6) | -9(4)  | 53(6)   |
| O(11)  | 90(5)   | 106(5)  | 113(5) | -12(4) | -13(4) | 14(4)   |
| C(115) | 107(7)  | 139(8)  | 66(5)  | 33(5)  | 28(5)  | 59(6)   |
| C(116) | 216(12) | 149(10) | 48(4)  | 26(6)  | 22(6)  | 106(10) |
| C(117) | 151(9)  | 161(9)  | 82(6)  | 47(6)  | 55(6)  | 72(8)   |
| C(118) | 47(4)   | 93(5)   | 139(7) | -66(4) | 5(4)   | 19(4)   |

---

**Table S5.** Hydrogen coordinates ( $\times 10^4$ ) and isotropic displacement parameters ( $\text{\AA}^2 \times 10^3$ ) for [Fe(TPP)(THF)(PhNO)] and [Fe(TPP)(PhNH<sub>2</sub>)(PhNO)].

|        | x     | y     | z     | U(eq) |
|--------|-------|-------|-------|-------|
| H(5NA) | 10140 | 8883  | 8795  | 33    |
| H(5NB) | 10609 | 8547  | 9310  | 33    |
| H(6NA) | 8153  | 5927  | 8577  | 37    |
| H(6NB) | 7351  | 6301  | 8231  | 37    |
| H(2A)  | 10657 | 7589  | 6608  | 27    |
| H(3A)  | 8972  | 8168  | 6496  | 27    |
| H(7A)  | 5920  | 8527  | 7809  | 31    |
| H(8A)  | 5729  | 8312  | 8832  | 31    |
| H(12A) | 7968  | 7116  | 10534 | 30    |
| H(13A) | 9671  | 6548  | 10653 | 29    |
| H(17A) | 12764 | 6233  | 9349  | 35    |
| H(18A) | 13019 | 6512  | 8346  | 34    |
| H(22A) | 6627  | 7460  | 6388  | 26    |
| H(23A) | 5690  | 8013  | 5626  | 29    |
| H(24A) | 5767  | 9399  | 5760  | 33    |
| H(25A) | 6765  | 10226 | 6664  | 36    |
| H(26A) | 7689  | 9675  | 7428  | 32    |
| H(28A) | 5497  | 6706  | 9812  | 39    |
| H(29A) | 4322  | 7030  | 10435 | 40    |
| H(28B) | 5033  | 7052  | 9481  | 31    |
| H(29B) | 3929  | 7410  | 10116 | 36    |
| H(30)  | 4889  | 8464  | 10872 | 41    |
| H(31A) | 6502  | 9450  | 10647 | 43    |
| H(32A) | 7660  | 9135  | 10030 | 36    |
| H(31B) | 7000  | 9282  | 10979 | 49    |
| H(32B) | 8137  | 8905  | 10349 | 42    |
| H(34A) | 12005 | 7353  | 10769 | 27    |
| H(35A) | 13060 | 6890  | 11537 | 30    |
| H(36A) | 13207 | 5560  | 11423 | 33    |
| H(37A) | 12246 | 4680  | 10535 | 37    |
| H(38A) | 11159 | 5133  | 9768  | 32    |
| H(40A) | 13000 | 8220  | 7302  | 29    |
| H(41A) | 14398 | 8049  | 6758  | 30    |
| H(42A) | 14374 | 6704  | 6472  | 31    |
| H(43A) | 12912 | 5536  | 6701  | 33    |
| H(44A) | 11515 | 5703  | 7250  | 30    |
| H(46A) | 12583 | 8505  | 9540  | 34    |
| H(47A) | 14571 | 8988  | 9361  | 38    |
| H(48A) | 14909 | 9598  | 8510  | 38    |
| H(49A) | 13263 | 9740  | 7852  | 36    |
| H(50A) | 11264 | 9240  | 8022  | 34    |
| H(52A) | 6939  | 6175  | 7207  | 34    |

|        |       |       |      |    |
|--------|-------|-------|------|----|
| H(53A) | 7037  | 5446  | 6346 | 42 |
| H(54A) | 8253  | 4606  | 6385 | 44 |
| H(55A) | 9381  | 4487  | 7284 | 43 |
| H(56A) | 9323  | 5229  | 8145 | 40 |
| H(58A) | 16    | 1104  | 4301 | 26 |
| H(59A) | 2211  | 2045  | 4555 | 27 |
| H(63A) | 5056  | 4248  | 6375 | 28 |
| H(64A) | 4833  | 4623  | 7375 | 28 |
| H(68A) | 1098  | 3864  | 8459 | 35 |
| H(69A) | -1155 | 3108  | 8143 | 32 |
| H(73A) | -4165 | 1430  | 6149 | 25 |
| H(74A) | -3860 | 833   | 5220 | 25 |
| H(78A) | 5023  | 2723  | 5866 | 31 |
| H(79A) | 6732  | 3115  | 5433 | 35 |
| H(80A) | 6738  | 3900  | 4649 | 35 |
| H(81A) | 5033  | 4280  | 4297 | 35 |
| H(82A) | 3318  | 3886  | 4727 | 31 |
| H(84A) | 3678  | 5443  | 7961 | 31 |
| H(85A) | 5159  | 6102  | 8832 | 37 |
| H(86A) | 5527  | 5295  | 9566 | 36 |
| H(87A) | 4565  | 3858  | 9416 | 38 |
| H(88A) | 3112  | 3197  | 8553 | 27 |
| H(84B) | 3849  | 5534  | 7786 | 30 |
| H(85B) | 5263  | 6304  | 8629 | 37 |
| H(86B) | 5651  | 5677  | 9460 | 37 |
| H(87B) | 4601  | 4242  | 9456 | 39 |
| H(88B) | 3190  | 3465  | 8607 | 32 |
| H(90A) | -2823 | 1244  | 7648 | 30 |
| H(91A) | -4498 | 987   | 8101 | 33 |
| H(92A) | -5761 | 1793  | 7962 | 31 |
| H(93A) | -5344 | 2864  | 7372 | 30 |
| H(94A) | -3639 | 3147  | 6935 | 28 |
| H(96A) | -1903 | -344  | 4935 | 40 |
| H(97A) | -3081 | -1331 | 4122 | 44 |
| H(98A) | -4097 | -922  | 3310 | 37 |
| H(99A) | -3914 | 481   | 3301 | 37 |
| H(10D) | -2709 | 1476  | 4104 | 34 |
| H(10E) | 1901  | 4719  | 5569 | 32 |
| H(10H) | 1713  | 4929  | 4585 | 35 |
| H(10C) | -96   | 4163  | 3897 | 35 |
| H(10A) | -1699 | 3160  | 4189 | 32 |
| H(10B) | -1495 | 2907  | 5168 | 29 |
| H(10I) | 1931  | 2131  | 7413 | 31 |
| H(10L) | 2478  | 1634  | 6989 | 31 |
| H(10J) | 1737  | 632   | 7627 | 53 |
| H(10K) | 486   | 847   | 7588 | 53 |
| H(10M) | 859   | 1730  | 7520 | 52 |
| H(10N) | 2188  | 2116  | 7357 | 52 |
| H(10P) | 1486  | 654   | 7689 | 40 |
| H(10Q) | 2395  | 869   | 7238 | 40 |

|        |       |      |      |     |
|--------|-------|------|------|-----|
| H(10F) | -167  | -268 | 6857 | 43  |
| H(10G) | 1152  | 11   | 6673 | 43  |
| H(10R) | 863   | -164 | 6608 | 43  |
| H(10S) | -153  | -123 | 6974 | 43  |
| H(11A) | 306   | 653  | 6002 | 51  |
| H(11B) | -781  | 631  | 6336 | 51  |
| H(11C) | -2788 | 976  | 9412 | 124 |
| H(11D) | -2916 | 1    | 9335 | 124 |
| H(11E) | -2569 | 388  | 8426 | 87  |
| H(11F) | -1589 | 1294 | 8714 | 87  |
| H(11G) | -266  | 638  | 8559 | 127 |
| H(11H) | -1165 | -259 | 8681 | 127 |
| H(11I) | -82   | 177  | 9644 | 136 |
| H(11J) | 396   | 1140 | 9541 | 136 |
| H(11K) | -899  | 1320 | 9575 | 117 |
| H(11L) | -2272 | 661  | 9321 | 117 |
| H(11M) | -2246 | 918  | 8440 | 153 |
| H(11N) | -1214 | 1790 | 8755 | 153 |
| H(11O) | 112   | 1510 | 8495 | 146 |
| H(11P) | -977  | 787  | 8044 | 146 |
| H(11Q) | -426  | -253 | 8531 | 120 |
| H(11R) | 706   | 479  | 8972 | 120 |

---

**Table S6.** Torsion angles [°] for [Fe(TPP)(THF)(PhNO)] and [Fe(TPP)(PhNH<sub>2</sub>)(PhNO)].

---

|                          |             |
|--------------------------|-------------|
| N(7)-Fe(2)-N(11)-O(3)    | -151.96(14) |
| N(9)-Fe(2)-N(11)-O(3)    | 27.64(15)   |
| N(10)-Fe(2)-N(11)-O(3)   | 118.12(14)  |
| N(8)-Fe(2)-N(11)-O(3)    | -62.08(14)  |
| N(7)-Fe(2)-N(11)-C(101)  | 13.42(15)   |
| N(9)-Fe(2)-N(11)-C(101)  | -166.98(14) |
| N(10)-Fe(2)-N(11)-C(101) | -76.49(14)  |
| N(8)-Fe(2)-N(11)-C(101)  | 103.30(14)  |
| C(4)-N(1)-C(1)-C(20)     | 178.85(17)  |
| Fe(1)-N(1)-C(1)-C(20)    | -1.9(3)     |
| C(4)-N(1)-C(1)-C(2)      | -0.1(2)     |
| Fe(1)-N(1)-C(1)-C(2)     | 179.15(12)  |
| N(1)-C(1)-C(2)-C(3)      | 0.7(2)      |
| C(20)-C(1)-C(2)-C(3)     | -178.23(18) |
| C(1)-C(2)-C(3)-C(4)      | -1.0(2)     |
| C(1)-N(1)-C(4)-C(5)      | 178.98(18)  |
| Fe(1)-N(1)-C(4)-C(5)     | -0.3(3)     |
| C(1)-N(1)-C(4)-C(3)      | -0.6(2)     |
| Fe(1)-N(1)-C(4)-C(3)     | -179.79(12) |
| C(2)-C(3)-C(4)-N(1)      | 1.0(2)      |
| C(2)-C(3)-C(4)-C(5)      | -178.53(18) |
| N(1)-C(4)-C(5)-C(6)      | -0.5(3)     |
| C(3)-C(4)-C(5)-C(6)      | 178.96(18)  |
| N(1)-C(4)-C(5)-C(21)     | 179.54(17)  |
| C(3)-C(4)-C(5)-C(21)     | -1.0(3)     |
| C(9)-N(2)-C(6)-C(5)      | 178.86(18)  |
| Fe(1)-N(2)-C(6)-C(5)     | -3.4(3)     |
| C(9)-N(2)-C(6)-C(7)      | -1.6(2)     |
| Fe(1)-N(2)-C(6)-C(7)     | 176.17(13)  |
| C(4)-C(5)-C(6)-N(2)      | 2.4(3)      |
| C(21)-C(5)-C(6)-N(2)     | -177.61(17) |
| C(4)-C(5)-C(6)-C(7)      | -177.08(19) |
| C(21)-C(5)-C(6)-C(7)     | 2.9(3)      |
| N(2)-C(6)-C(7)-C(8)      | 1.6(2)      |
| C(5)-C(6)-C(7)-C(8)      | -178.84(19) |
| C(6)-C(7)-C(8)-C(9)      | -0.9(2)     |
| C(6)-N(2)-C(9)-C(10)     | -179.75(18) |
| Fe(1)-N(2)-C(9)-C(10)    | 2.5(3)      |
| C(6)-N(2)-C(9)-C(8)      | 1.0(2)      |
| Fe(1)-N(2)-C(9)-C(8)     | -176.72(13) |
| C(7)-C(8)-C(9)-N(2)      | 0.0(2)      |
| C(7)-C(8)-C(9)-C(10)     | -179.31(19) |
| N(2)-C(9)-C(10)-C(11)    | -4.6(3)     |
| C(8)-C(9)-C(10)-C(11)    | 174.55(19)  |
| N(2)-C(9)-C(10)-C(27)    | 173.28(17)  |
| C(8)-C(9)-C(10)-C(27)    | -7.6(3)     |
| C(14)-N(3)-C(11)-C(10)   | 178.12(18)  |



|                         |             |
|-------------------------|-------------|
| Fe(1)-N(3)-C(11)-C(10)  | -0.9(3)     |
| C(14)-N(3)-C(11)-C(12)  | -1.9(2)     |
| Fe(1)-N(3)-C(11)-C(12)  | 179.09(13)  |
| C(9)-C(10)-C(11)-N(3)   | 3.7(3)      |
| C(27)-C(10)-C(11)-N(3)  | -174.13(17) |
| C(9)-C(10)-C(11)-C(12)  | -176.25(18) |
| C(27)-C(10)-C(11)-C(12) | 5.9(3)      |
| N(3)-C(11)-C(12)-C(13)  | 1.0(2)      |
| C(10)-C(11)-C(12)-C(13) | -179.05(18) |
| C(11)-C(12)-C(13)-C(14) | 0.4(2)      |
| C(11)-N(3)-C(14)-C(15)  | -178.24(18) |
| Fe(1)-N(3)-C(14)-C(15)  | 0.8(3)      |
| C(11)-N(3)-C(14)-C(13)  | 2.1(2)      |
| Fe(1)-N(3)-C(14)-C(13)  | -178.87(13) |
| C(12)-C(13)-C(14)-N(3)  | -1.6(2)     |
| C(12)-C(13)-C(14)-C(15) | 178.77(18)  |
| N(3)-C(14)-C(15)-C(16)  | -1.5(3)     |
| C(13)-C(14)-C(15)-C(16) | 178.14(19)  |
| N(3)-C(14)-C(15)-C(33)  | 176.82(17)  |
| C(13)-C(14)-C(15)-C(33) | -3.6(3)     |
| C(19)-N(4)-C(16)-C(15)  | 178.65(18)  |
| Fe(1)-N(4)-C(16)-C(15)  | 3.3(3)      |
| C(19)-N(4)-C(16)-C(17)  | 0.7(2)      |
| Fe(1)-N(4)-C(16)-C(17)  | -174.64(14) |
| C(14)-C(15)-C(16)-N(4)  | -0.7(3)     |
| C(33)-C(15)-C(16)-N(4)  | -178.95(17) |
| C(14)-C(15)-C(16)-C(17) | 176.96(19)  |
| C(33)-C(15)-C(16)-C(17) | -1.3(3)     |
| N(4)-C(16)-C(17)-C(18)  | -0.1(2)     |
| C(15)-C(16)-C(17)-C(18) | -178.06(19) |
| C(16)-C(17)-C(18)-C(19) | -0.6(2)     |
| C(16)-N(4)-C(19)-C(20)  | 179.60(18)  |
| Fe(1)-N(4)-C(19)-C(20)  | -5.0(3)     |
| C(16)-N(4)-C(19)-C(18)  | -1.1(2)     |
| Fe(1)-N(4)-C(19)-C(18)  | 174.30(13)  |
| C(17)-C(18)-C(19)-N(4)  | 1.1(2)      |
| C(17)-C(18)-C(19)-C(20) | -179.61(19) |
| N(1)-C(1)-C(20)-C(19)   | 1.1(3)      |
| C(2)-C(1)-C(20)-C(19)   | 179.92(18)  |
| N(1)-C(1)-C(20)-C(39)   | -178.29(17) |
| C(2)-C(1)-C(20)-C(39)   | 0.5(3)      |
| N(4)-C(19)-C(20)-C(1)   | 2.5(3)      |
| C(18)-C(19)-C(20)-C(1)  | -176.70(19) |
| N(4)-C(19)-C(20)-C(39)  | -178.05(17) |
| C(18)-C(19)-C(20)-C(39) | 2.7(3)      |
| C(4)-C(5)-C(21)-C(26)   | -117.4(2)   |
| C(6)-C(5)-C(21)-C(26)   | 62.7(2)     |
| C(4)-C(5)-C(21)-C(22)   | 61.7(2)     |
| C(6)-C(5)-C(21)-C(22)   | -118.3(2)   |
| C(26)-C(21)-C(22)-C(23) | 0.5(3)      |

|                            |             |
|----------------------------|-------------|
| C(5)-C(21)-C(22)-C(23)     | -178.59(17) |
| C(21)-C(22)-C(23)-C(24)    | 0.1(3)      |
| C(22)-C(23)-C(24)-C(25)    | -0.4(3)     |
| C(23)-C(24)-C(25)-C(26)    | 0.2(3)      |
| C(24)-C(25)-C(26)-C(21)    | 0.4(3)      |
| C(22)-C(21)-C(26)-C(25)    | -0.7(3)     |
| C(5)-C(21)-C(26)-C(25)     | 178.35(18)  |
| C(11)-C(10)-C(27)-C(32)    | 101.6(4)    |
| C(9)-C(10)-C(27)-C(32)     | -76.4(4)    |
| C(11)-C(10)-C(27)-C(28A)   | -110.9(4)   |
| C(9)-C(10)-C(27)-C(28A)    | 71.1(4)     |
| C(11)-C(10)-C(27)-C(28)    | -77.1(4)    |
| C(9)-C(10)-C(27)-C(28)     | 104.9(4)    |
| C(11)-C(10)-C(27)-C(32A)   | 72.7(4)     |
| C(9)-C(10)-C(27)-C(32A)    | -105.3(4)   |
| C(32)-C(27)-C(28)-C(29)    | 0.9(8)      |
| C(10)-C(27)-C(28)-C(29)    | 179.7(5)    |
| C(27)-C(28)-C(29)-C(30)    | -0.9(9)     |
| C(32A)-C(27)-C(28A)-C(29A) | -3.6(7)     |
| C(10)-C(27)-C(28A)-C(29A)  | 180.0(4)    |
| C(27)-C(28A)-C(29A)-C(30)  | -0.1(9)     |
| C(28A)-C(29A)-C(30)-C(31A) | 4.6(8)      |
| C(28)-C(29)-C(30)-C(31)    | 0.7(8)      |
| C(29)-C(30)-C(31)-C(32)    | -0.6(9)     |
| C(28)-C(27)-C(32)-C(31)    | -0.8(8)     |
| C(10)-C(27)-C(32)-C(31)    | -179.5(5)   |
| C(30)-C(31)-C(32)-C(27)    | 0.7(10)     |
| C(29A)-C(30)-C(31A)-C(32A) | -5.3(9)     |
| C(30)-C(31A)-C(32A)-C(27)  | 1.5(11)     |
| C(28A)-C(27)-C(32A)-C(31A) | 2.8(9)      |
| C(10)-C(27)-C(32A)-C(31A)  | 179.4(6)    |
| C(14)-C(15)-C(33)-C(38)    | 121.2(2)    |
| C(16)-C(15)-C(33)-C(38)    | -60.4(3)    |
| C(14)-C(15)-C(33)-C(34)    | -59.1(2)    |
| C(16)-C(15)-C(33)-C(34)    | 119.3(2)    |
| C(38)-C(33)-C(34)-C(35)    | 0.3(3)      |
| C(15)-C(33)-C(34)-C(35)    | -179.40(17) |
| C(33)-C(34)-C(35)-C(36)    | 0.5(3)      |
| C(34)-C(35)-C(36)-C(37)    | -0.8(3)     |
| C(35)-C(36)-C(37)-C(38)    | 0.2(3)      |
| C(36)-C(37)-C(38)-C(33)    | 0.6(3)      |
| C(34)-C(33)-C(38)-C(37)    | -0.8(3)     |
| C(15)-C(33)-C(38)-C(37)    | 178.83(18)  |
| C(1)-C(20)-C(39)-C(44)     | -114.1(2)   |
| C(19)-C(20)-C(39)-C(44)    | 66.4(2)     |
| C(1)-C(20)-C(39)-C(40)     | 67.2(2)     |
| C(19)-C(20)-C(39)-C(40)    | -112.3(2)   |
| C(44)-C(39)-C(40)-C(41)    | -1.4(3)     |
| C(20)-C(39)-C(40)-C(41)    | 177.30(17)  |
| C(39)-C(40)-C(41)-C(42)    | 0.2(3)      |

|                         |             |
|-------------------------|-------------|
| C(40)-C(41)-C(42)-C(43) | 1.2(3)      |
| C(41)-C(42)-C(43)-C(44) | -1.4(3)     |
| C(40)-C(39)-C(44)-C(43) | 1.2(3)      |
| C(20)-C(39)-C(44)-C(43) | -177.45(18) |
| C(42)-C(43)-C(44)-C(39) | 0.1(3)      |
| O(1)-N(5)-C(45)-C(46)   | 75.2(3)     |
| Fe(1)-N(5)-C(45)-C(46)  | -95.2(2)    |
| O(1)-N(5)-C(45)-C(50)   | -104.7(3)   |
| Fe(1)-N(5)-C(45)-C(50)  | 84.9(2)     |
| C(50)-C(45)-C(46)-C(47) | -0.6(3)     |
| N(5)-C(45)-C(46)-C(47)  | 179.53(19)  |
| C(45)-C(46)-C(47)-C(48) | 0.3(3)      |
| C(46)-C(47)-C(48)-C(49) | 0.5(3)      |
| C(47)-C(48)-C(49)-C(50) | -1.0(3)     |
| C(48)-C(49)-C(50)-C(45) | 0.7(3)      |
| C(46)-C(45)-C(50)-C(49) | 0.1(3)      |
| N(5)-C(45)-C(50)-C(49)  | 179.97(19)  |
| O(2)-N(6)-C(51)-C(52)   | 67.7(3)     |
| Fe(1)-N(6)-C(51)-C(52)  | -92.0(2)    |
| O(2)-N(6)-C(51)-C(56)   | -114.2(3)   |
| Fe(1)-N(6)-C(51)-C(56)  | 86.1(2)     |
| C(56)-C(51)-C(52)-C(53) | -0.5(3)     |
| N(6)-C(51)-C(52)-C(53)  | 177.62(18)  |
| C(51)-C(52)-C(53)-C(54) | 0.6(3)      |
| C(52)-C(53)-C(54)-C(55) | 0.0(3)      |
| C(53)-C(54)-C(55)-C(56) | -0.6(3)     |
| C(52)-C(51)-C(56)-C(55) | -0.1(3)     |
| N(6)-C(51)-C(56)-C(55)  | -178.22(19) |
| C(54)-C(55)-C(56)-C(51) | 0.7(3)      |
| C(60)-N(7)-C(57)-C(76)  | -175.06(18) |
| Fe(2)-N(7)-C(57)-C(76)  | 5.4(3)      |
| C(60)-N(7)-C(57)-C(58)  | 1.5(2)      |
| Fe(2)-N(7)-C(57)-C(58)  | -178.03(12) |
| N(7)-C(57)-C(58)-C(59)  | -1.6(2)     |
| C(76)-C(57)-C(58)-C(59) | 175.09(18)  |
| C(57)-C(58)-C(59)-C(60) | 0.9(2)      |
| C(57)-N(7)-C(60)-C(61)  | -179.32(18) |
| Fe(2)-N(7)-C(60)-C(61)  | 0.2(3)      |
| C(57)-N(7)-C(60)-C(59)  | -0.9(2)     |
| Fe(2)-N(7)-C(60)-C(59)  | 178.62(13)  |
| C(58)-C(59)-C(60)-N(7)  | 0.0(2)      |
| C(58)-C(59)-C(60)-C(61) | 178.42(18)  |
| N(7)-C(60)-C(61)-C(62)  | 4.9(3)      |
| C(59)-C(60)-C(61)-C(62) | -173.30(18) |
| N(7)-C(60)-C(61)-C(77)  | -175.62(17) |
| C(59)-C(60)-C(61)-C(77) | 6.2(3)      |
| C(65)-N(8)-C(62)-C(61)  | 178.07(18)  |
| Fe(2)-N(8)-C(62)-C(61)  | -12.0(3)    |
| C(65)-N(8)-C(62)-C(63)  | -0.5(2)     |
| Fe(2)-N(8)-C(62)-C(63)  | 169.40(13)  |

|                          |             |
|--------------------------|-------------|
| C(60)-C(61)-C(62)-N(8)   | 1.4(3)      |
| C(77)-C(61)-C(62)-N(8)   | -178.09(17) |
| C(60)-C(61)-C(62)-C(63)  | 179.79(18)  |
| C(77)-C(61)-C(62)-C(63)  | 0.3(3)      |
| N(8)-C(62)-C(63)-C(64)   | 1.5(2)      |
| C(61)-C(62)-C(63)-C(64)  | -177.11(18) |
| C(62)-C(63)-C(64)-C(65)  | -1.8(2)     |
| C(62)-N(8)-C(65)-C(66)   | -179.22(19) |
| Fe(2)-N(8)-C(65)-C(66)   | 11.0(3)     |
| C(62)-N(8)-C(65)-C(64)   | -0.6(2)     |
| Fe(2)-N(8)-C(65)-C(64)   | -170.37(13) |
| C(63)-C(64)-C(65)-N(8)   | 1.6(2)      |
| C(63)-C(64)-C(65)-C(66)  | -179.79(19) |
| N(8)-C(65)-C(66)-C(67)   | -7.7(3)     |
| C(64)-C(65)-C(66)-C(67)  | 173.86(19)  |
| N(8)-C(65)-C(66)-C(83)   | 165.1(6)    |
| C(64)-C(65)-C(66)-C(83)  | -13.3(6)    |
| N(8)-C(65)-C(66)-C(83A)  | 177.1(6)    |
| C(64)-C(65)-C(66)-C(83A) | -1.3(6)     |
| C(70)-N(9)-C(67)-C(66)   | -176.87(19) |
| Fe(2)-N(9)-C(67)-C(66)   | 2.7(3)      |
| C(70)-N(9)-C(67)-C(68)   | 0.8(2)      |
| Fe(2)-N(9)-C(67)-C(68)   | -179.56(14) |
| C(65)-C(66)-C(67)-N(9)   | 0.5(3)      |
| C(83)-C(66)-C(67)-N(9)   | -172.5(6)   |
| C(83A)-C(66)-C(67)-N(9)  | 175.4(6)    |
| C(65)-C(66)-C(67)-C(68)  | -176.9(2)   |
| C(83)-C(66)-C(67)-C(68)  | 10.1(7)     |
| C(83A)-C(66)-C(67)-C(68) | -2.0(6)     |
| N(9)-C(67)-C(68)-C(69)   | -0.6(2)     |
| C(66)-C(67)-C(68)-C(69)  | 177.2(2)    |
| C(67)-C(68)-C(69)-C(70)  | 0.1(2)      |
| C(67)-N(9)-C(70)-C(71)   | 176.65(19)  |
| Fe(2)-N(9)-C(70)-C(71)   | -3.0(3)     |
| C(67)-N(9)-C(70)-C(69)   | -0.8(2)     |
| Fe(2)-N(9)-C(70)-C(69)   | 179.61(13)  |
| C(68)-C(69)-C(70)-N(9)   | 0.4(2)      |
| C(68)-C(69)-C(70)-C(71)  | -177.04(19) |
| N(9)-C(70)-C(71)-C(72)   | 5.1(3)      |
| C(69)-C(70)-C(71)-C(72)  | -177.84(19) |
| N(9)-C(70)-C(71)-C(89)   | -179.46(17) |
| C(69)-C(70)-C(71)-C(89)  | -2.4(3)     |
| C(75)-N(10)-C(72)-C(71)  | 171.62(18)  |
| Fe(2)-N(10)-C(72)-C(71)  | -11.5(3)    |
| C(75)-N(10)-C(72)-C(73)  | -2.48(19)   |
| Fe(2)-N(10)-C(72)-C(73)  | 174.44(12)  |
| C(70)-C(71)-C(72)-N(10)  | 2.6(3)      |
| C(89)-C(71)-C(72)-N(10)  | -172.95(17) |
| C(70)-C(71)-C(72)-C(73)  | 175.87(18)  |
| C(89)-C(71)-C(72)-C(73)  | 0.4(3)      |

|                             |             |
|-----------------------------|-------------|
| N(10)-C(72)-C(73)-C(74)     | 2.0(2)      |
| C(71)-C(72)-C(73)-C(74)     | -172.19(18) |
| C(72)-C(73)-C(74)-C(75)     | -0.7(2)     |
| C(72)-N(10)-C(75)-C(76)     | -177.93(17) |
| Fe(2)-N(10)-C(75)-C(76)     | 5.2(3)      |
| C(72)-N(10)-C(75)-C(74)     | 2.0(2)      |
| Fe(2)-N(10)-C(75)-C(74)     | -174.82(12) |
| C(73)-C(74)-C(75)-N(10)     | -0.8(2)     |
| C(73)-C(74)-C(75)-C(76)     | 179.14(18)  |
| N(10)-C(75)-C(76)-C(57)     | -6.1(3)     |
| C(74)-C(75)-C(76)-C(57)     | 173.97(18)  |
| N(10)-C(75)-C(76)-C(95)     | 174.74(17)  |
| C(74)-C(75)-C(76)-C(95)     | -5.2(3)     |
| N(7)-C(57)-C(76)-C(75)      | 0.5(3)      |
| C(58)-C(57)-C(76)-C(75)     | -175.58(18) |
| N(7)-C(57)-C(76)-C(95)      | 179.75(17)  |
| C(58)-C(57)-C(76)-C(95)     | 3.6(3)      |
| C(62)-C(61)-C(77)-C(78)     | 66.6(2)     |
| C(60)-C(61)-C(77)-C(78)     | -112.9(2)   |
| C(62)-C(61)-C(77)-C(82)     | -110.8(2)   |
| C(60)-C(61)-C(77)-C(82)     | 69.7(2)     |
| C(82)-C(77)-C(78)-C(79)     | 0.6(3)      |
| C(61)-C(77)-C(78)-C(79)     | -176.91(18) |
| C(77)-C(78)-C(79)-C(80)     | -0.1(3)     |
| C(78)-C(79)-C(80)-C(81)     | -0.3(3)     |
| C(79)-C(80)-C(81)-C(82)     | 0.2(3)      |
| C(80)-C(81)-C(82)-C(77)     | 0.3(3)      |
| C(78)-C(77)-C(82)-C(81)     | -0.7(3)     |
| C(61)-C(77)-C(82)-C(81)     | 176.81(18)  |
| C(65)-C(66)-C(83)-C(84)     | 73.6(17)    |
| C(67)-C(66)-C(83)-C(84)     | -113.1(14)  |
| C(65)-C(66)-C(83)-C(88)     | -105.9(15)  |
| C(67)-C(66)-C(83)-C(88)     | 67.4(18)    |
| C(88)-C(83)-C(84)-C(85)     | 3(2)        |
| C(66)-C(83)-C(84)-C(85)     | -176.1(13)  |
| C(83)-C(84)-C(85)-C(86)     | -2.9(17)    |
| C(84)-C(85)-C(86)-C(87)     | 1.9(13)     |
| C(85)-C(86)-C(87)-C(88)     | -1.6(13)    |
| C(86)-C(87)-C(88)-C(83)     | 2.2(17)     |
| C(84)-C(83)-C(88)-C(87)     | -3(2)       |
| C(66)-C(83)-C(88)-C(87)     | 176.4(14)   |
| C(65)-C(66)-C(83A)-C(88A)   | -115.9(14)  |
| C(67)-C(66)-C(83A)-C(88A)   | 68.7(17)    |
| C(65)-C(66)-C(83A)-C(84A)   | 58.7(18)    |
| C(67)-C(66)-C(83A)-C(84A)   | -116.6(15)  |
| C(88A)-C(83A)-C(84A)-C(85A) | -2(2)       |
| C(66)-C(83A)-C(84A)-C(85A)  | -176.9(14)  |
| C(83A)-C(84A)-C(85A)-C(86A) | 0.9(17)     |
| C(84A)-C(85A)-C(86A)-C(87A) | 0.2(13)     |
| C(85A)-C(86A)-C(87A)-C(88A) | 0.0(13)     |

|                             |             |
|-----------------------------|-------------|
| C(84A)-C(83A)-C(88A)-C(87A) | 3(2)        |
| C(66)-C(83A)-C(88A)-C(87A)  | 177.5(13)   |
| C(86A)-C(87A)-C(88A)-C(83A) | -1.4(18)    |
| C(70)-C(71)-C(89)-C(90)     | -79.1(2)    |
| C(72)-C(71)-C(89)-C(90)     | 96.6(2)     |
| C(70)-C(71)-C(89)-C(94)     | 101.1(2)    |
| C(72)-C(71)-C(89)-C(94)     | -83.2(2)    |
| C(94)-C(89)-C(90)-C(91)     | -0.2(3)     |
| C(71)-C(89)-C(90)-C(91)     | 179.94(17)  |
| C(89)-C(90)-C(91)-C(92)     | 0.6(3)      |
| C(90)-C(91)-C(92)-C(93)     | -0.2(3)     |
| C(91)-C(92)-C(93)-C(94)     | -0.6(3)     |
| C(92)-C(93)-C(94)-C(89)     | 1.0(3)      |
| C(90)-C(89)-C(94)-C(93)     | -0.6(3)     |
| C(71)-C(89)-C(94)-C(93)     | 179.23(17)  |
| C(75)-C(76)-C(95)-C(100)    | 87.8(2)     |
| C(57)-C(76)-C(95)-C(100)    | -91.5(2)    |
| C(75)-C(76)-C(95)-C(96)     | -93.9(2)    |
| C(57)-C(76)-C(95)-C(96)     | 86.8(2)     |
| C(100)-C(95)-C(96)-C(97)    | 0.5(3)      |
| C(76)-C(95)-C(96)-C(97)     | -177.9(2)   |
| C(95)-C(96)-C(97)-C(98)     | -0.8(4)     |
| C(96)-C(97)-C(98)-C(99)     | 0.5(3)      |
| C(97)-C(98)-C(99)-C(100)    | 0.2(3)      |
| C(96)-C(95)-C(100)-C(99)    | 0.1(3)      |
| C(76)-C(95)-C(100)-C(99)    | 178.49(18)  |
| C(98)-C(99)-C(100)-C(95)    | -0.4(3)     |
| O(3)-N(11)-C(101)-C(106)    | -128.32(19) |
| Fe(2)-N(11)-C(101)-C(106)   | 65.2(2)     |
| O(3)-N(11)-C(101)-C(102)    | 51.8(2)     |
| Fe(2)-N(11)-C(101)-C(102)   | -114.64(18) |
| C(106)-C(101)-C(102)-C(103) | -1.4(3)     |
| N(11)-C(101)-C(102)-C(103)  | 178.52(18)  |
| C(101)-C(102)-C(103)-C(104) | 1.7(3)      |
| C(102)-C(103)-C(104)-C(105) | -0.8(3)     |
| C(103)-C(104)-C(105)-C(106) | -0.5(3)     |
| C(102)-C(101)-C(106)-C(105) | 0.1(3)      |
| N(11)-C(101)-C(106)-C(105)  | -179.78(18) |
| C(104)-C(105)-C(106)-C(101) | 0.8(3)      |
| O(4)-C(107)-C(108)-C(109)   | 43.5(6)     |
| O(4)-C(17A)-C(18A)-C(109)   | -26.4(7)    |
| C(107)-C(108)-C(109)-C(110) | -36.4(5)    |
| C(17A)-C(18A)-C(109)-C(110) | 19.0(6)     |
| C(108)-C(109)-C(110)-O(4)   | 18.1(4)     |
| C(18A)-C(109)-C(110)-O(4)   | -4.3(4)     |
| C(108)-C(107)-O(4)-C(110)   | -34.0(5)    |
| C(108)-C(107)-O(4)-Fe(2)    | 150.7(4)    |
| C(109)-C(110)-O(4)-C(107)   | 10.9(4)     |
| C(109)-C(110)-O(4)-C(17A)   | -12.6(4)    |
| C(109)-C(110)-O(4)-Fe(2)    | -173.82(14) |

|                             |           |
|-----------------------------|-----------|
| C(18A)-C(17A)-O(4)-C(110)   | 25.1(7)   |
| C(18A)-C(17A)-O(4)-Fe(2)    | -172.6(4) |
| C(114)-O(10)-C(111)-C(112)  | -23.8(11) |
| O(10)-C(111)-C(112)-C(113)  | 39.1(10)  |
| C(111)-C(112)-C(113)-C(114) | -34.1(11) |
| C(111)-O(10)-C(114)-C(113)  | 3.0(14)   |
| C(112)-C(113)-C(114)-O(10)  | 19.7(13)  |
| C(118)-O(11)-C(115)-C(116)  | 22.4(13)  |
| O(11)-C(115)-C(116)-C(117)  | -23.4(17) |
| C(115)-C(116)-C(117)-C(118) | 15.3(17)  |
| C(115)-O(11)-C(118)-C(117)  | -12.6(10) |
| C(116)-C(117)-C(118)-O(11)  | -1.9(13)  |

**Table S7.** Crystal data and structure refinement for [Fe(TPP)(THF)(iPrNO)].

|                                   |                                                                                                                           |
|-----------------------------------|---------------------------------------------------------------------------------------------------------------------------|
| Empirical formula                 | C <sub>51</sub> H <sub>43</sub> FeN <sub>5</sub> O <sub>2</sub>                                                           |
| Formula weight                    | 813.75                                                                                                                    |
| Temperature                       | 85(2) K                                                                                                                   |
| Wavelength                        | 1.54178 Å                                                                                                                 |
| Crystal system, space group       | Monoclinic, P2(1)/c                                                                                                       |
| Unit cell dimensions              | a = 13.4128(9) Å    alpha = 90 deg.<br>b = 15.7751(10) Å    beta = 94.719(7) deg.<br>c = 18.9793(13) Å    gamma = 90 deg. |
| Volume                            | 4002.2(5) Å <sup>3</sup>                                                                                                  |
| Z, Calculated density             | 4, 1.351 Mg/m <sup>3</sup>                                                                                                |
| Absorption coefficient            | 3.407 mm <sup>-1</sup>                                                                                                    |
| F(000)                            | 1704                                                                                                                      |
| Crystal size                      | 0.24 x 0.14 x 0.12 mm                                                                                                     |
| Theta range for data collection   | 4.34 to 68.19 deg.                                                                                                        |
| Limiting indices                  | -16<=h<=16, -18<=k<=18, -22<=l<=22                                                                                        |
| Reflections collected / unique    | 103181 / 7302 [R(int) = 0.0540]                                                                                           |
| Completeness to theta =           | 68.19    99.9 %                                                                                                           |
| Absorption correction             | Semi-empirical from equivalents                                                                                           |
| Max. and min. transmission        | 0.6853 and 0.4952                                                                                                         |
| Refinement method                 | Full-matrix least-squares on F <sup>2</sup>                                                                               |
| Data / restraints / parameters    | 7302 / 124 / 571                                                                                                          |
| Goodness-of-fit on F <sup>2</sup> | 1.053                                                                                                                     |
| Final R indices [I>2sigma(I)]     | R1 = 0.0612, wR2 = 0.1627                                                                                                 |
| R indices (all data)              | R1 = 0.0621, wR2 = 0.1635                                                                                                 |
| Largest diff. peak and hole       | 1.775 and -0.556 e.Å <sup>-3</sup>                                                                                        |

**Table S8.** Atomic coordinates ( $\times 10^4$ ) and equivalent isotropic displacement parameters ( $\text{\AA}^2 \times 10^3$ ) for [Fe(TPP)(THF)(iPrNO)]. U(eq) is defined as one third of the trace of the orthogonalized  $U_{ij}$  tensor.

|       | x       | y       | z       | U(eq) |
|-------|---------|---------|---------|-------|
| Fe(1) | 2599(1) | 5421(1) | 2384(1) | 17(1) |
| O(1)  | 2460(2) | 4626(1) | 1129(1) | 41(1) |
| N(1)  | 1679(1) | 4907(1) | 3053(1) | 18(1) |
| N(2)  | 3494(1) | 4416(1) | 2512(1) | 19(1) |
| N(3)  | 3557(1) | 5970(1) | 1782(1) | 18(1) |
| N(4)  | 1717(1) | 6445(1) | 2287(1) | 18(1) |
| N(5)  | 1974(2) | 4926(1) | 1580(1) | 24(1) |
| C(1)  | 1821(2) | 4169(2) | 3434(1) | 20(1) |
| C(2)  | 2616(2) | 3609(2) | 3389(1) | 21(1) |
| C(3)  | 3360(2) | 3712(2) | 2923(1) | 20(1) |
| C(4)  | 4098(2) | 3082(2) | 2807(1) | 24(1) |
| C(5)  | 4693(2) | 3405(2) | 2334(1) | 23(1) |
| C(6)  | 4333(2) | 4247(2) | 2164(1) | 19(1) |
| C(7)  | 4800(2) | 4816(2) | 1739(1) | 19(1) |
| C(8)  | 4434(2) | 5624(2) | 1574(1) | 19(1) |
| C(9)  | 4913(2) | 6218(2) | 1136(1) | 21(1) |
| C(10) | 4314(2) | 6900(2) | 1054(1) | 21(1) |
| C(11) | 3470(2) | 6752(2) | 1454(1) | 18(1) |
| C(12) | 2666(2) | 7310(2) | 1490(1) | 20(1) |
| C(13) | 1860(2) | 7165(2) | 1893(1) | 19(1) |
| C(14) | 1051(2) | 7753(2) | 1960(1) | 23(1) |
| C(15) | 417(2)  | 7389(2) | 2383(1) | 24(1) |
| C(16) | 825(2)  | 6573(2) | 2588(1) | 20(1) |
| C(17) | 378(2)  | 6010(2) | 3033(1) | 19(1) |
| C(18) | 795(2)  | 5245(2) | 3258(1) | 19(1) |
| C(19) | 380(2)  | 4700(2) | 3767(1) | 22(1) |
| C(20) | 1023(2) | 4048(2) | 3888(1) | 22(1) |
| C(21) | 2708(2) | 2867(2) | 3883(1) | 25(1) |
| C(22) | 2075(2) | 2173(2) | 3814(2) | 38(1) |
| C(23) | 2198(2) | 1493(2) | 4286(2) | 48(1) |
| C(24) | 2931(2) | 1513(2) | 4835(2) | 43(1) |
| C(25) | 3554(2) | 2200(2) | 4917(2) | 36(1) |
| C(26) | 3447(2) | 2876(2) | 4445(1) | 28(1) |
| C(27) | 5760(2) | 4551(1) | 1448(1) | 20(1) |
| C(28) | 6630(2) | 4440(2) | 1895(1) | 28(1) |
| C(29) | 7516(2) | 4191(2) | 1629(2) | 34(1) |
| C(30) | 7554(2) | 4070(2) | 908(2)  | 30(1) |
| C(31) | 6702(2) | 4184(2) | 456(1)  | 26(1) |
| C(32) | 5810(2) | 4411(2) | 727(1)  | 21(1) |
| C(33) | 2640(2) | 8111(2) | 1058(1) | 21(1) |
| C(34) | 3353(2) | 8750(2) | 1190(1) | 28(1) |
| C(35) | 3289(2) | 9500(2) | 806(2)  | 35(1) |



|        |          |          |          |       |
|--------|----------|----------|----------|-------|
| C(36)  | 2517(2)  | 9627(2)  | 286(2)   | 35(1) |
| C(37)  | 1807(2)  | 9000(2)  | 147(2)   | 34(1) |
| C(38)  | 1872(2)  | 8248(2)  | 526(1)   | 29(1) |
| C(39)  | -622(2)  | 6252(2)  | 3268(1)  | 21(1) |
| C(40)  | -711(2)  | 6679(2)  | 3898(2)  | 34(1) |
| C(41)  | -1636(2) | 6930(2)  | 4095(2)  | 36(1) |
| C(42)  | -2487(2) | 6763(2)  | 3657(2)  | 35(1) |
| C(43)  | -2414(2) | 6324(2)  | 3035(2)  | 45(1) |
| C(44)  | -1482(2) | 6061(2)  | 2847(2)  | 37(1) |
| C(45)  | 880(2)   | 4917(2)  | 1435(2)  | 43(1) |
| C(46)  | 590(3)   | 5488(3)  | 827(2)   | 70(1) |
| C(47)  | 557(3)   | 4016(3)  | 1296(2)  | 58(1) |
| O(2)   | 3371(1)  | 5973(1)  | 3270(1)  | 32(1) |
| C(48)  | 3048(3)  | 6732(3)  | 3638(2)  | 44(1) |
| C(49)  | 3838(3)  | 6932(3)  | 4219(2)  | 42(1) |
| C(50)  | 4641(3)  | 6224(3)  | 4157(2)  | 40(1) |
| C(51)  | 4458(3)  | 5957(3)  | 3399(2)  | 34(1) |
| O(2A)  | 3371(1)  | 5973(1)  | 3270(1)  | 32(1) |
| C(48A) | 3191(10) | 6826(8)  | 3510(9)  | 41(1) |
| C(49A) | 3993(11) | 6937(11) | 4127(9)  | 51(1) |
| C(50A) | 4842(8)  | 6510(8)  | 3682(10) | 58(2) |
| C(51A) | 4295(9)  | 5657(8)  | 3633(10) | 45(2) |

---

**Table S9.** Bond lengths [Å] and angles [°] for [Fe(TPP)(THF)(iPrNO)].

---

|              |            |
|--------------|------------|
| Fe(1)-N(5)   | 1.853(2)   |
| Fe(1)-N(3)   | 1.988(2)   |
| Fe(1)-N(2)   | 1.991(2)   |
| Fe(1)-N(4)   | 2.002(2)   |
| Fe(1)-N(1)   | 2.012(2)   |
| Fe(1)-O(2)   | 2.0899(19) |
| O(1)-N(5)    | 1.212(3)   |
| N(1)-C(1)    | 1.375(3)   |
| N(1)-C(18)   | 1.385(3)   |
| N(2)-C(3)    | 1.377(3)   |
| N(2)-C(6)    | 1.379(3)   |
| N(3)-C(11)   | 1.381(3)   |
| N(3)-C(8)    | 1.384(3)   |
| N(4)-C(13)   | 1.381(3)   |
| N(4)-C(16)   | 1.382(3)   |
| N(5)-C(45)   | 1.470(4)   |
| C(1)-C(2)    | 1.392(3)   |
| C(1)-C(20)   | 1.442(3)   |
| C(2)-C(3)    | 1.397(3)   |
| C(2)-C(21)   | 1.499(3)   |
| C(3)-C(4)    | 1.432(3)   |
| C(4)-C(5)    | 1.348(4)   |
| C(4)-H(4A)   | 0.9500     |
| C(5)-C(6)    | 1.441(3)   |
| C(5)-H(5A)   | 0.9500     |
| C(6)-C(7)    | 1.389(3)   |
| C(7)-C(8)    | 1.393(3)   |
| C(7)-C(27)   | 1.501(3)   |
| C(8)-C(9)    | 1.437(3)   |
| C(9)-C(10)   | 1.345(3)   |
| C(9)-H(9A)   | 0.9500     |
| C(10)-C(11)  | 1.434(3)   |
| C(10)-H(10A) | 0.9500     |
| C(11)-C(12)  | 1.399(3)   |
| C(12)-C(13)  | 1.394(3)   |
| C(12)-C(33)  | 1.504(3)   |
| C(13)-C(14)  | 1.441(3)   |
| C(14)-C(15)  | 1.345(4)   |
| C(14)-H(14A) | 0.9500     |
| C(15)-C(16)  | 1.440(3)   |
| C(15)-H(15A) | 0.9500     |
| C(16)-C(17)  | 1.394(3)   |
| C(17)-C(18)  | 1.384(3)   |
| C(17)-C(39)  | 1.497(3)   |
| C(18)-C(19)  | 1.439(3)   |
| C(19)-C(20)  | 1.349(3)   |
| C(19)-H(19A) | 0.9500     |
| C(20)-H(20A) | 0.9500     |

|              |          |
|--------------|----------|
| C(21)-C(22)  | 1.385(4) |
| C(21)-C(26)  | 1.395(4) |
| C(22)-C(23)  | 1.399(4) |
| C(22)-H(22A) | 0.9500   |
| C(23)-C(24)  | 1.373(5) |
| C(23)-H(23A) | 0.9500   |
| C(24)-C(25)  | 1.369(5) |
| C(24)-H(24A) | 0.9500   |
| C(25)-C(26)  | 1.392(4) |
| C(25)-H(25A) | 0.9500   |
| C(26)-H(26A) | 0.9500   |
| C(27)-C(32)  | 1.392(3) |
| C(27)-C(28)  | 1.398(3) |
| C(28)-C(29)  | 1.386(4) |
| C(28)-H(28A) | 0.9500   |
| C(29)-C(30)  | 1.386(4) |
| C(29)-H(29A) | 0.9500   |
| C(30)-C(31)  | 1.383(4) |
| C(30)-H(30A) | 0.9500   |
| C(31)-C(32)  | 1.388(4) |
| C(31)-H(31A) | 0.9500   |
| C(32)-H(32A) | 0.9500   |
| C(33)-C(34)  | 1.397(4) |
| C(33)-C(38)  | 1.399(4) |
| C(34)-C(35)  | 1.388(4) |
| C(34)-H(34A) | 0.9500   |
| C(35)-C(36)  | 1.386(4) |
| C(35)-H(35A) | 0.9500   |
| C(36)-C(37)  | 1.383(4) |
| C(36)-H(36A) | 0.9500   |
| C(37)-C(38)  | 1.387(4) |
| C(37)-H(37A) | 0.9500   |
| C(38)-H(38A) | 0.9500   |
| C(39)-C(44)  | 1.382(4) |
| C(39)-C(40)  | 1.386(4) |
| C(40)-C(41)  | 1.383(4) |
| C(40)-H(40A) | 0.9500   |
| C(41)-C(42)  | 1.382(4) |
| C(41)-H(41A) | 0.9500   |
| C(42)-C(43)  | 1.378(4) |
| C(42)-H(42A) | 0.9500   |
| C(43)-C(44)  | 1.391(4) |
| C(43)-H(43A) | 0.9500   |
| C(44)-H(44A) | 0.9500   |
| C(45)-C(46)  | 1.489(6) |
| C(45)-C(47)  | 1.504(5) |
| C(45)-H(45A) | 1.0000   |
| C(46)-H(46A) | 0.9800   |
| C(46)-H(46B) | 0.9800   |
| C(46)-H(46C) | 0.9800   |

|                  |            |
|------------------|------------|
| C(47)-H(47A)     | 0.9800     |
| C(47)-H(47B)     | 0.9800     |
| C(47)-H(47C)     | 0.9800     |
| O(2)-C(51)       | 1.458(4)   |
| O(2)-C(48)       | 1.470(4)   |
| C(48)-C(49)      | 1.497(6)   |
| C(48)-H(48A)     | 0.9900     |
| C(48)-H(48B)     | 0.9900     |
| C(49)-C(50)      | 1.564(5)   |
| C(49)-H(49A)     | 0.9900     |
| C(49)-H(49B)     | 0.9900     |
| C(50)-C(51)      | 1.499(5)   |
| C(50)-H(50A)     | 0.9900     |
| C(50)-H(50B)     | 0.9900     |
| C(51)-H(51A)     | 0.9900     |
| C(51)-H(51B)     | 0.9900     |
| C(48A)-C(49A)    | 1.533(14)  |
| C(48A)-H(48C)    | 0.9900     |
| C(48A)-H(48D)    | 0.9900     |
| C(49A)-C(50A)    | 1.619(16)  |
| C(49A)-H(49C)    | 0.9900     |
| C(49A)-H(49D)    | 0.9900     |
| C(50A)-C(51A)    | 1.532(13)  |
| C(50A)-H(50C)    | 0.9900     |
| C(50A)-H(50D)    | 0.9900     |
| C(51A)-H(51C)    | 0.9900     |
| C(51A)-H(51D)    | 0.9900     |
|                  |            |
| N(5)-Fe(1)-N(3)  | 88.81(8)   |
| N(5)-Fe(1)-N(2)  | 89.59(9)   |
| N(3)-Fe(1)-N(2)  | 90.32(8)   |
| N(5)-Fe(1)-N(4)  | 92.28(8)   |
| N(3)-Fe(1)-N(4)  | 89.99(8)   |
| N(2)-Fe(1)-N(4)  | 178.11(8)  |
| N(5)-Fe(1)-N(1)  | 95.23(8)   |
| N(3)-Fe(1)-N(1)  | 175.96(8)  |
| N(2)-Fe(1)-N(1)  | 89.83(8)   |
| N(4)-Fe(1)-N(1)  | 89.74(8)   |
| N(5)-Fe(1)-O(2)  | 177.16(8)  |
| N(3)-Fe(1)-O(2)  | 88.84(8)   |
| N(2)-Fe(1)-O(2)  | 88.83(8)   |
| N(4)-Fe(1)-O(2)  | 89.31(8)   |
| N(1)-Fe(1)-O(2)  | 87.13(8)   |
| C(1)-N(1)-C(18)  | 105.27(19) |
| C(1)-N(1)-Fe(1)  | 127.35(15) |
| C(18)-N(1)-Fe(1) | 127.29(16) |
| C(3)-N(2)-C(6)   | 105.35(19) |
| C(3)-N(2)-Fe(1)  | 127.33(16) |
| C(6)-N(2)-Fe(1)  | 127.12(16) |
| C(11)-N(3)-C(8)  | 105.44(19) |

|                    |            |
|--------------------|------------|
| C(11)-N(3)-Fe(1)   | 127.80(15) |
| C(8)-N(3)-Fe(1)    | 126.70(16) |
| C(13)-N(4)-C(16)   | 105.47(19) |
| C(13)-N(4)-Fe(1)   | 127.34(16) |
| C(16)-N(4)-Fe(1)   | 127.18(16) |
| O(1)-N(5)-C(45)    | 116.8(2)   |
| O(1)-N(5)-Fe(1)    | 120.79(18) |
| C(45)-N(5)-Fe(1)   | 122.33(18) |
| N(1)-C(1)-C(2)     | 125.4(2)   |
| N(1)-C(1)-C(20)    | 110.4(2)   |
| C(2)-C(1)-C(20)    | 124.2(2)   |
| C(1)-C(2)-C(3)     | 123.7(2)   |
| C(1)-C(2)-C(21)    | 118.8(2)   |
| C(3)-C(2)-C(21)    | 117.4(2)   |
| N(2)-C(3)-C(2)     | 125.8(2)   |
| N(2)-C(3)-C(4)     | 110.4(2)   |
| C(2)-C(3)-C(4)     | 123.8(2)   |
| C(5)-C(4)-C(3)     | 107.2(2)   |
| C(5)-C(4)-H(4A)    | 126.4      |
| C(3)-C(4)-H(4A)    | 126.4      |
| C(4)-C(5)-C(6)     | 107.0(2)   |
| C(4)-C(5)-H(5A)    | 126.5      |
| C(6)-C(5)-H(5A)    | 126.5      |
| N(2)-C(6)-C(7)     | 125.3(2)   |
| N(2)-C(6)-C(5)     | 110.0(2)   |
| C(7)-C(6)-C(5)     | 124.6(2)   |
| C(6)-C(7)-C(8)     | 123.7(2)   |
| C(6)-C(7)-C(27)    | 118.4(2)   |
| C(8)-C(7)-C(27)    | 117.9(2)   |
| N(3)-C(8)-C(7)     | 126.0(2)   |
| N(3)-C(8)-C(9)     | 109.8(2)   |
| C(7)-C(8)-C(9)     | 124.1(2)   |
| C(10)-C(9)-C(8)    | 107.3(2)   |
| C(10)-C(9)-H(9A)   | 126.4      |
| C(8)-C(9)-H(9A)    | 126.4      |
| C(9)-C(10)-C(11)   | 107.4(2)   |
| C(9)-C(10)-H(10A)  | 126.3      |
| C(11)-C(10)-H(10A) | 126.3      |
| N(3)-C(11)-C(12)   | 125.3(2)   |
| N(3)-C(11)-C(10)   | 110.0(2)   |
| C(12)-C(11)-C(10)  | 124.6(2)   |
| C(13)-C(12)-C(11)  | 124.0(2)   |
| C(13)-C(12)-C(33)  | 117.0(2)   |
| C(11)-C(12)-C(33)  | 119.1(2)   |
| N(4)-C(13)-C(12)   | 125.5(2)   |
| N(4)-C(13)-C(14)   | 110.1(2)   |
| C(12)-C(13)-C(14)  | 124.4(2)   |
| C(15)-C(14)-C(13)  | 107.2(2)   |
| C(15)-C(14)-H(14A) | 126.4      |
| C(13)-C(14)-H(14A) | 126.4      |

|                    |          |
|--------------------|----------|
| C(14)-C(15)-C(16)  | 107.3(2) |
| C(14)-C(15)-H(15A) | 126.3    |
| C(16)-C(15)-H(15A) | 126.3    |
| N(4)-C(16)-C(17)   | 126.0(2) |
| N(4)-C(16)-C(15)   | 110.0(2) |
| C(17)-C(16)-C(15)  | 124.1(2) |
| C(18)-C(17)-C(16)  | 124.1(2) |
| C(18)-C(17)-C(39)  | 118.6(2) |
| C(16)-C(17)-C(39)  | 117.3(2) |
| C(17)-C(18)-N(1)   | 125.6(2) |
| C(17)-C(18)-C(19)  | 124.1(2) |
| N(1)-C(18)-C(19)   | 110.3(2) |
| C(20)-C(19)-C(18)  | 107.0(2) |
| C(20)-C(19)-H(19A) | 126.5    |
| C(18)-C(19)-H(19A) | 126.5    |
| C(19)-C(20)-C(1)   | 107.1(2) |
| C(19)-C(20)-H(20A) | 126.5    |
| C(1)-C(20)-H(20A)  | 126.5    |
| C(22)-C(21)-C(26)  | 118.2(2) |
| C(22)-C(21)-C(2)   | 122.6(2) |
| C(26)-C(21)-C(2)   | 119.2(2) |
| C(21)-C(22)-C(23)  | 120.4(3) |
| C(21)-C(22)-H(22A) | 119.8    |
| C(23)-C(22)-H(22A) | 119.8    |
| C(24)-C(23)-C(22)  | 120.5(3) |
| C(24)-C(23)-H(23A) | 119.8    |
| C(22)-C(23)-H(23A) | 119.8    |
| C(25)-C(24)-C(23)  | 119.8(3) |
| C(25)-C(24)-H(24A) | 120.1    |
| C(23)-C(24)-H(24A) | 120.1    |
| C(24)-C(25)-C(26)  | 120.3(3) |
| C(24)-C(25)-H(25A) | 119.9    |
| C(26)-C(25)-H(25A) | 119.9    |
| C(25)-C(26)-C(21)  | 120.8(3) |
| C(25)-C(26)-H(26A) | 119.6    |
| C(21)-C(26)-H(26A) | 119.6    |
| C(32)-C(27)-C(28)  | 118.1(2) |
| C(32)-C(27)-C(7)   | 121.2(2) |
| C(28)-C(27)-C(7)   | 120.7(2) |
| C(29)-C(28)-C(27)  | 120.8(2) |
| C(29)-C(28)-H(28A) | 119.6    |
| C(27)-C(28)-H(28A) | 119.6    |
| C(30)-C(29)-C(28)  | 120.1(2) |
| C(30)-C(29)-H(29A) | 120.0    |
| C(28)-C(29)-H(29A) | 120.0    |
| C(31)-C(30)-C(29)  | 119.9(2) |
| C(31)-C(30)-H(30A) | 120.1    |
| C(29)-C(30)-H(30A) | 120.1    |
| C(30)-C(31)-C(32)  | 119.8(2) |
| C(30)-C(31)-H(31A) | 120.1    |

|                     |          |
|---------------------|----------|
| C(32)-C(31)-H(31A)  | 120.1    |
| C(31)-C(32)-C(27)   | 121.2(2) |
| C(31)-C(32)-H(32A)  | 119.4    |
| C(27)-C(32)-H(32A)  | 119.4    |
| C(34)-C(33)-C(38)   | 118.0(2) |
| C(34)-C(33)-C(12)   | 121.6(2) |
| C(38)-C(33)-C(12)   | 120.3(2) |
| C(35)-C(34)-C(33)   | 120.6(3) |
| C(35)-C(34)-H(34A)  | 119.7    |
| C(33)-C(34)-H(34A)  | 119.7    |
| C(36)-C(35)-C(34)   | 120.5(3) |
| C(36)-C(35)-H(35A)  | 119.8    |
| C(34)-C(35)-H(35A)  | 119.8    |
| C(37)-C(36)-C(35)   | 119.6(3) |
| C(37)-C(36)-H(36A)  | 120.2    |
| C(35)-C(36)-H(36A)  | 120.2    |
| C(36)-C(37)-C(38)   | 120.0(3) |
| C(36)-C(37)-H(37A)  | 120.0    |
| C(38)-C(37)-H(37A)  | 120.0    |
| C(37)-C(38)-C(33)   | 121.2(3) |
| C(37)-C(38)-H(38A)  | 119.4    |
| C(33)-C(38)-H(38A)  | 119.4    |
| C(44)-C(39)-C(40)   | 118.5(2) |
| C(44)-C(39)-C(17)   | 119.9(2) |
| C(40)-C(39)-C(17)   | 121.6(2) |
| C(41)-C(40)-C(39)   | 121.1(3) |
| C(41)-C(40)-H(40A)  | 119.5    |
| C(39)-C(40)-H(40A)  | 119.5    |
| C(42)-C(41)-C(40)   | 119.8(3) |
| C(42)-C(41)-H(41A)  | 120.1    |
| C(40)-C(41)-H(41A)  | 120.1    |
| C(43)-C(42)-C(41)   | 119.8(3) |
| C(43)-C(42)-H(42A)  | 120.1    |
| C(41)-C(42)-H(42A)  | 120.1    |
| C(42)-C(43)-C(44)   | 119.9(3) |
| C(42)-C(43)-H(43A)  | 120.0    |
| C(44)-C(43)-H(43A)  | 120.0    |
| C(39)-C(44)-C(43)   | 120.8(3) |
| C(39)-C(44)-H(44A)  | 119.6    |
| C(43)-C(44)-H(44A)  | 119.6    |
| N(5)-C(45)-C(46)    | 109.4(3) |
| N(5)-C(45)-C(47)    | 108.1(3) |
| C(46)-C(45)-C(47)   | 112.5(3) |
| N(5)-C(45)-H(45A)   | 108.9    |
| C(46)-C(45)-H(45A)  | 108.9    |
| C(47)-C(45)-H(45A)  | 108.9    |
| C(45)-C(46)-H(46A)  | 109.5    |
| C(45)-C(46)-H(46B)  | 109.5    |
| H(46A)-C(46)-H(46B) | 109.5    |
| C(45)-C(46)-H(46C)  | 109.5    |

|                      |            |
|----------------------|------------|
| H(46A)-C(46)-H(46C)  | 109.5      |
| H(46B)-C(46)-H(46C)  | 109.5      |
| C(45)-C(47)-H(47A)   | 109.5      |
| C(45)-C(47)-H(47B)   | 109.5      |
| H(47A)-C(47)-H(47B)  | 109.5      |
| C(45)-C(47)-H(47C)   | 109.5      |
| H(47A)-C(47)-H(47C)  | 109.5      |
| H(47B)-C(47)-H(47C)  | 109.5      |
| C(51)-O(2)-C(48)     | 105.2(3)   |
| C(51)-O(2)-Fe(1)     | 123.47(18) |
| C(48)-O(2)-Fe(1)     | 125.2(2)   |
| O(2)-C(48)-C(49)     | 107.7(3)   |
| O(2)-C(48)-H(48A)    | 110.2      |
| C(49)-C(48)-H(48A)   | 110.2      |
| O(2)-C(48)-H(48B)    | 110.2      |
| C(49)-C(48)-H(48B)   | 110.2      |
| H(48A)-C(48)-H(48B)  | 108.5      |
| C(48)-C(49)-C(50)    | 104.1(3)   |
| C(48)-C(49)-H(49A)   | 110.9      |
| C(50)-C(49)-H(49A)   | 110.9      |
| C(48)-C(49)-H(49B)   | 110.9      |
| C(50)-C(49)-H(49B)   | 110.9      |
| H(49A)-C(49)-H(49B)  | 109.0      |
| C(51)-C(50)-C(49)    | 102.3(3)   |
| C(51)-C(50)-H(50A)   | 111.3      |
| C(49)-C(50)-H(50A)   | 111.3      |
| C(51)-C(50)-H(50B)   | 111.3      |
| C(49)-C(50)-H(50B)   | 111.3      |
| H(50A)-C(50)-H(50B)  | 109.2      |
| O(2)-C(51)-C(50)     | 103.9(3)   |
| O(2)-C(51)-H(51A)    | 111.0      |
| C(50)-C(51)-H(51A)   | 111.0      |
| O(2)-C(51)-H(51B)    | 111.0      |
| C(50)-C(51)-H(51B)   | 111.0      |
| H(51A)-C(51)-H(51B)  | 109.0      |
| C(49A)-C(48A)-H(48C) | 111.2      |
| C(49A)-C(48A)-H(48D) | 111.2      |
| H(48C)-C(48A)-H(48D) | 109.1      |
| C(48A)-C(49A)-C(50A) | 91.9(10)   |
| C(48A)-C(49A)-H(49C) | 113.3      |
| C(50A)-C(49A)-H(49C) | 113.3      |
| C(48A)-C(49A)-H(49D) | 113.3      |
| C(50A)-C(49A)-H(49D) | 113.3      |
| H(49C)-C(49A)-H(49D) | 110.6      |
| C(51A)-C(50A)-C(49A) | 92.5(10)   |
| C(51A)-C(50A)-H(50C) | 113.2      |
| C(49A)-C(50A)-H(50C) | 113.2      |
| C(51A)-C(50A)-H(50D) | 113.2      |
| C(49A)-C(50A)-H(50D) | 113.2      |
| H(50C)-C(50A)-H(50D) | 110.6      |



|                      |       |
|----------------------|-------|
| C(50A)-C(51A)-H(51C) | 112.5 |
| C(50A)-C(51A)-H(51D) | 112.5 |
| H(51C)-C(51A)-H(51D) | 110.0 |

**Table S10.** Anisotropic displacement parameters ( $\text{\AA}^2 \times 10^3$ ) for  $[\text{Fe}(\text{TPP})(\text{THF})(i\text{PrNO})]$ . The anisotropic displacement factor exponent takes the form:  $-2\pi^2[h^2a^2U_{11} + \dots + 2hkabU_{12}]$ .

|       | U11   | U22   | U33   | U23    | U13   | U12   |
|-------|-------|-------|-------|--------|-------|-------|
| Fe(1) | 14(1) | 15(1) | 21(1) | -2(1)  | 4(1)  | 1(1)  |
| O(1)  | 36(1) | 47(1) | 41(1) | -11(1) | 8(1)  | -3(1) |
| N(1)  | 15(1) | 19(1) | 21(1) | -1(1)  | 3(1)  | 3(1)  |
| N(2)  | 16(1) | 22(1) | 20(1) | 2(1)   | 5(1)  | 2(1)  |
| N(3)  | 14(1) | 19(1) | 22(1) | 0(1)   | 3(1)  | 3(1)  |
| N(4)  | 16(1) | 19(1) | 20(1) | -2(1)  | 4(1)  | 0(1)  |
| N(5)  | 22(1) | 24(1) | 28(1) | 7(1)   | 13(1) | 8(1)  |
| C(1)  | 17(1) | 20(1) | 23(1) | 0(1)   | 3(1)  | 1(1)  |
| C(2)  | 19(1) | 22(1) | 23(1) | 3(1)   | 3(1)  | 3(1)  |
| C(3)  | 17(1) | 22(1) | 22(1) | 4(1)   | 2(1)  | 2(1)  |
| C(4)  | 22(1) | 22(1) | 27(1) | 5(1)   | 4(1)  | 6(1)  |
| C(5)  | 16(1) | 25(1) | 29(1) | 3(1)   | 6(1)  | 8(1)  |
| C(6)  | 16(1) | 22(1) | 20(1) | 1(1)   | 3(1)  | 4(1)  |
| C(7)  | 15(1) | 24(1) | 19(1) | 0(1)   | 3(1)  | 1(1)  |
| C(8)  | 14(1) | 23(1) | 22(1) | 0(1)   | 3(1)  | 0(1)  |
| C(9)  | 17(1) | 23(1) | 23(1) | 0(1)   | 6(1)  | -1(1) |
| C(10) | 21(1) | 19(1) | 22(1) | 1(1)   | 4(1)  | -4(1) |
| C(11) | 18(1) | 18(1) | 19(1) | 0(1)   | 1(1)  | -2(1) |
| C(12) | 20(1) | 18(1) | 20(1) | 1(1)   | 1(1)  | 0(1)  |
| C(13) | 18(1) | 19(1) | 22(1) | -1(1)  | 2(1)  | 2(1)  |
| C(14) | 22(1) | 19(1) | 29(1) | 0(1)   | 4(1)  | 5(1)  |
| C(15) | 20(1) | 23(1) | 28(1) | -2(1)  | 6(1)  | 8(1)  |
| C(16) | 16(1) | 21(1) | 22(1) | -3(1)  | 4(1)  | 3(1)  |
| C(17) | 16(1) | 21(1) | 20(1) | -4(1)  | 5(1)  | 2(1)  |
| C(18) | 15(1) | 21(1) | 21(1) | -4(1)  | 4(1)  | 0(1)  |
| C(19) | 17(1) | 24(1) | 24(1) | -2(1)  | 7(1)  | 0(1)  |
| C(20) | 20(1) | 22(1) | 26(1) | 4(1)   | 7(1)  | 0(1)  |
| C(21) | 21(1) | 22(1) | 34(1) | 7(1)   | 13(1) | 7(1)  |
| C(22) | 23(1) | 29(1) | 63(2) | 11(1)  | 9(1)  | 1(1)  |
| C(23) | 32(2) | 30(2) | 85(2) | 20(2)  | 29(2) | 4(1)  |
| C(24) | 42(2) | 37(2) | 54(2) | 21(1)  | 32(1) | 22(1) |
| C(25) | 46(2) | 35(1) | 28(1) | 8(1)   | 18(1) | 23(1) |
| C(26) | 35(1) | 27(1) | 23(1) | 2(1)   | 11(1) | 11(1) |
| C(27) | 16(1) | 21(1) | 24(1) | 2(1)   | 4(1)  | 2(1)  |
| C(28) | 17(1) | 44(2) | 23(1) | 2(1)   | 1(1)  | 2(1)  |
| C(29) | 17(1) | 53(2) | 30(1) | 5(1)   | 0(1)  | 7(1)  |

|        |       |       |       |        |        |        |
|--------|-------|-------|-------|--------|--------|--------|
| C(30)  | 18(1) | 38(2) | 36(1) | 0(1)   | 9(1)   | 4(1)   |
| C(31)  | 22(1) | 30(1) | 26(1) | -2(1)  | 8(1)   | 0(1)   |
| C(32)  | 17(1) | 23(1) | 23(1) | 0(1)   | 1(1)   | 0(1)   |
| C(33)  | 23(1) | 19(1) | 23(1) | 2(1)   | 6(1)   | 4(1)   |
| C(34)  | 31(1) | 22(1) | 30(1) | 1(1)   | 0(1)   | -2(1)  |
| C(35)  | 44(2) | 22(1) | 38(2) | 4(1)   | 2(1)   | -7(1)  |
| C(36)  | 46(2) | 22(1) | 38(2) | 10(1)  | 5(1)   | 3(1)   |
| C(37)  | 33(1) | 32(1) | 35(1) | 10(1)  | -1(1)  | 6(1)   |
| C(38)  | 27(1) | 26(1) | 33(1) | 6(1)   | 3(1)   | 0(1)   |
| C(39)  | 20(1) | 19(1) | 26(1) | 2(1)   | 9(1)   | 4(1)   |
| C(40)  | 29(1) | 43(2) | 30(1) | -10(1) | 4(1)   | 10(1)  |
| C(41)  | 37(2) | 40(2) | 33(1) | -7(1)  | 13(1)  | 10(1)  |
| C(42)  | 23(1) | 37(2) | 46(2) | 0(1)   | 15(1)  | 7(1)   |
| C(43)  | 19(1) | 61(2) | 55(2) | -22(2) | 9(1)   | -2(1)  |
| C(44)  | 21(1) | 47(2) | 42(2) | -18(1) | 7(1)   | -2(1)  |
| C(45)  | 28(1) | 59(2) | 43(2) | -18(2) | 2(1)   | -1(1)  |
| C(46)  | 69(2) | 72(2) | 63(2) | -31(2) | -31(2) | 32(2)  |
| C(47)  | 45(2) | 66(2) | 63(2) | -4(2)  | 0(2)   | -28(2) |
| O(2)   | 22(1) | 41(1) | 33(1) | -3(1)  | 1(1)   | 7(1)   |
| C(48)  | 41(2) | 50(2) | 42(2) | -6(2)  | 10(2)  | 17(2)  |
| C(49)  | 40(2) | 43(2) | 45(2) | -16(2) | 15(2)  | 3(2)   |
| C(50)  | 34(2) | 47(2) | 36(2) | -14(2) | -7(1)  | 6(2)   |
| C(51)  | 26(2) | 40(2) | 36(2) | -11(2) | -3(1)  | 2(2)   |
| O(2A)  | 22(1) | 41(1) | 33(1) | -3(1)  | 1(1)   | 7(1)   |
| C(48A) | 38(1) | 34(1) | 48(2) | -4(2)  | -11(2) | 0(2)   |
| C(49A) | 43(2) | 43(2) | 62(3) | -6(2)  | -20(1) | -4(2)  |
| C(50A) | 36(1) | 46(2) | 88(5) | -7(3)  | -15(2) | -3(1)  |
| C(51A) | 26(2) | 44(2) | 62(5) | -3(2)  | -14(3) | 2(1)   |

---

**Table S11.** Hydrogen coordinates ( $\times 10^4$ ) and isotropic displacement parameters ( $\text{\AA}^2 \times 10^3$ ) for [Fe(TPP)(THF)(iPrNO)].

|        | x     | y     | z    | U(eq) |
|--------|-------|-------|------|-------|
| H(4A)  | 4157  | 2539  | 3022 | 28    |
| H(5A)  | 5244  | 3130  | 2149 | 28    |
| H(9A)  | 5537  | 6143  | 942  | 25    |
| H(10A) | 4428  | 7390  | 780  | 25    |
| H(14A) | 980   | 8296  | 1746 | 28    |
| H(15A) | -188  | 7627  | 2520 | 28    |
| H(19A) | -232  | 4782  | 3977 | 26    |
| H(20A) | 962   | 3596  | 4212 | 27    |
| H(22A) | 1555  | 2158  | 3443 | 46    |
| H(23A) | 1770  | 1013  | 4227 | 58    |
| H(24A) | 3006  | 1052  | 5157 | 51    |
| H(25A) | 4061  | 2215  | 5296 | 43    |
| H(26A) | 3883  | 3350  | 4507 | 33    |
| H(28A) | 6615  | 4535  | 2389 | 34    |
| H(29A) | 8098  | 4102  | 1940 | 40    |
| H(30A) | 8165  | 3910  | 724  | 36    |
| H(31A) | 6727  | 4106  | -38  | 31    |
| H(32A) | 5223  | 4471  | 416  | 25    |
| H(34A) | 3886  | 8670  | 1545 | 33    |
| H(35A) | 3778  | 9929  | 901  | 42    |
| H(36A) | 2475  | 10142 | 25   | 42    |
| H(37A) | 1275  | 9085  | -208 | 40    |
| H(38A) | 1387  | 7818  | 423  | 34    |
| H(40A) | -128  | 6802  | 4199 | 41    |
| H(41A) | -1686 | 7216  | 4531 | 44    |
| H(42A) | -3122 | 6950  | 3783 | 42    |
| H(43A) | -2998 | 6202  | 2736 | 54    |
| H(44A) | -1437 | 5746  | 2424 | 44    |
| H(45A) | 568   | 5130  | 1862 | 52    |
| H(46A) | 730   | 6077  | 966  | 105   |
| H(46B) | -126  | 5423  | 688  | 105   |
| H(46C) | 975   | 5339  | 428  | 105   |
| H(47A) | -166  | 3968  | 1333 | 88    |
| H(47B) | 911   | 3643  | 1646 | 88    |
| H(47C) | 714   | 3850  | 821  | 88    |
| H(48A) | 2401  | 6625  | 3837 | 53    |
| H(48B) | 2964  | 7214  | 3305 | 53    |
| H(49A) | 3560  | 6913  | 4686 | 51    |
| H(49B) | 4127  | 7501  | 4151 | 51    |
| H(50A) | 5327  | 6450  | 4258 | 47    |
| H(50B) | 4538  | 5747  | 4482 | 47    |
| H(51A) | 4773  | 6357  | 3083 | 41    |
| H(51B) | 4723  | 5381  | 3327 | 41    |
| H(48C) | 2511  | 6881  | 3670 | 49    |

|        |      |      |      |    |
|--------|------|------|------|----|
| H(48D) | 3276 | 7246 | 3132 | 49 |
| H(49C) | 3854 | 6608 | 4552 | 61 |
| H(49D) | 4131 | 7538 | 4250 | 61 |
| H(50C) | 4896 | 6780 | 3216 | 69 |
| H(50D) | 5506 | 6479 | 3950 | 69 |
| H(51C) | 4634 | 5236 | 3348 | 54 |
| H(51D) | 4192 | 5417 | 4104 | 54 |

---

**Table S12.** Torsion angles [ $^{\circ}$ ] for [Fe(TPP)(THF)(iPrNO)].

|                       |             |
|-----------------------|-------------|
| N(5)-Fe(1)-N(1)-C(1)  | 94.0(2)     |
| N(3)-Fe(1)-N(1)-C(1)  | -87.6(11)   |
| N(2)-Fe(1)-N(1)-C(1)  | 4.4(2)      |
| N(4)-Fe(1)-N(1)-C(1)  | -173.7(2)   |
| O(2)-Fe(1)-N(1)-C(1)  | -84.4(2)    |
| N(5)-Fe(1)-N(1)-C(18) | -89.9(2)    |
| N(3)-Fe(1)-N(1)-C(18) | 88.5(11)    |
| N(2)-Fe(1)-N(1)-C(18) | -179.47(19) |
| N(4)-Fe(1)-N(1)-C(18) | 2.37(19)    |
| O(2)-Fe(1)-N(1)-C(18) | 91.69(19)   |
| N(5)-Fe(1)-N(2)-C(3)  | -94.3(2)    |
| N(3)-Fe(1)-N(2)-C(3)  | 176.9(2)    |
| N(4)-Fe(1)-N(2)-C(3)  | 78(3)       |
| N(1)-Fe(1)-N(2)-C(3)  | 1.0(2)      |
| O(2)-Fe(1)-N(2)-C(3)  | 88.1(2)     |
| N(5)-Fe(1)-N(2)-C(6)  | 79.8(2)     |
| N(3)-Fe(1)-N(2)-C(6)  | -9.0(2)     |
| N(4)-Fe(1)-N(2)-C(6)  | -108(3)     |
| N(1)-Fe(1)-N(2)-C(6)  | 175.0(2)    |
| O(2)-Fe(1)-N(2)-C(6)  | -97.8(2)    |
| N(5)-Fe(1)-N(3)-C(11) | 90.2(2)     |
| N(2)-Fe(1)-N(3)-C(11) | 179.77(19)  |
| N(4)-Fe(1)-N(3)-C(11) | -2.10(19)   |
| N(1)-Fe(1)-N(3)-C(11) | -88.2(11)   |
| O(2)-Fe(1)-N(3)-C(11) | -91.41(19)  |
| N(5)-Fe(1)-N(3)-C(8)  | -86.4(2)    |
| N(2)-Fe(1)-N(3)-C(8)  | 3.20(19)    |
| N(4)-Fe(1)-N(3)-C(8)  | -178.67(19) |
| N(1)-Fe(1)-N(3)-C(8)  | 95.2(11)    |
| O(2)-Fe(1)-N(3)-C(8)  | 92.02(19)   |
| N(5)-Fe(1)-N(4)-C(13) | -86.3(2)    |
| N(3)-Fe(1)-N(4)-C(13) | 2.46(19)    |
| N(2)-Fe(1)-N(4)-C(13) | 102(3)      |
| N(1)-Fe(1)-N(4)-C(13) | 178.43(19)  |
| O(2)-Fe(1)-N(4)-C(13) | 91.30(19)   |
| N(5)-Fe(1)-N(4)-C(16) | 92.2(2)     |
| N(3)-Fe(1)-N(4)-C(16) | -179.04(19) |
| N(2)-Fe(1)-N(4)-C(16) | -80(3)      |
| N(1)-Fe(1)-N(4)-C(16) | -3.07(19)   |
| O(2)-Fe(1)-N(4)-C(16) | -90.20(19)  |
| N(3)-Fe(1)-N(5)-O(1)  | 42.3(2)     |
| N(2)-Fe(1)-N(5)-O(1)  | -48.0(2)    |
| N(4)-Fe(1)-N(5)-O(1)  | 132.2(2)    |
| N(1)-Fe(1)-N(5)-O(1)  | -137.8(2)   |
| O(2)-Fe(1)-N(5)-O(1)  | 8.2(18)     |
| N(3)-Fe(1)-N(5)-C(45) | -134.3(2)   |
| N(2)-Fe(1)-N(5)-C(45) | 135.4(2)    |

|                        |             |
|------------------------|-------------|
| N(4)-Fe(1)-N(5)-C(45)  | -44.3(2)    |
| N(1)-Fe(1)-N(5)-C(45)  | 45.6(2)     |
| O(2)-Fe(1)-N(5)-C(45)  | -168.4(16)  |
| C(18)-N(1)-C(1)-C(2)   | 178.9(2)    |
| Fe(1)-N(1)-C(1)-C(2)   | -4.3(3)     |
| C(18)-N(1)-C(1)-C(20)  | -0.6(3)     |
| Fe(1)-N(1)-C(1)-C(20)  | 176.15(16)  |
| N(1)-C(1)-C(2)-C(3)    | -2.6(4)     |
| C(20)-C(1)-C(2)-C(3)   | 176.9(2)    |
| N(1)-C(1)-C(2)-C(21)   | 175.1(2)    |
| C(20)-C(1)-C(2)-C(21)  | -5.5(4)     |
| C(6)-N(2)-C(3)-C(2)    | 177.7(2)    |
| Fe(1)-N(2)-C(3)-C(2)   | -7.2(4)     |
| C(6)-N(2)-C(3)-C(4)    | -2.4(3)     |
| Fe(1)-N(2)-C(3)-C(4)   | 172.67(16)  |
| C(1)-C(2)-C(3)-N(2)    | 8.7(4)      |
| C(21)-C(2)-C(3)-N(2)   | -169.0(2)   |
| C(1)-C(2)-C(3)-C(4)    | -171.2(2)   |
| C(21)-C(2)-C(3)-C(4)   | 11.1(4)     |
| N(2)-C(3)-C(4)-C(5)    | 0.9(3)      |
| C(2)-C(3)-C(4)-C(5)    | -179.2(2)   |
| C(3)-C(4)-C(5)-C(6)    | 0.9(3)      |
| C(3)-N(2)-C(6)-C(7)    | -173.8(2)   |
| Fe(1)-N(2)-C(6)-C(7)   | 11.1(3)     |
| C(3)-N(2)-C(6)-C(5)    | 3.0(3)      |
| Fe(1)-N(2)-C(6)-C(5)   | -172.12(16) |
| C(4)-C(5)-C(6)-N(2)    | -2.5(3)     |
| C(4)-C(5)-C(6)-C(7)    | 174.3(2)    |
| N(2)-C(6)-C(7)-C(8)    | -4.4(4)     |
| C(5)-C(6)-C(7)-C(8)    | 179.3(2)    |
| N(2)-C(6)-C(7)-C(27)   | 174.8(2)    |
| C(5)-C(6)-C(7)-C(27)   | -1.5(4)     |
| C(11)-N(3)-C(8)-C(7)   | -175.8(2)   |
| Fe(1)-N(3)-C(8)-C(7)   | 1.4(3)      |
| C(11)-N(3)-C(8)-C(9)   | 2.4(3)      |
| Fe(1)-N(3)-C(8)-C(9)   | 179.59(15)  |
| C(6)-C(7)-C(8)-N(3)    | -2.2(4)     |
| C(27)-C(7)-C(8)-N(3)   | 178.7(2)    |
| C(6)-C(7)-C(8)-C(9)    | 179.9(2)    |
| C(27)-C(7)-C(8)-C(9)   | 0.7(3)      |
| N(3)-C(8)-C(9)-C(10)   | -2.6(3)     |
| C(7)-C(8)-C(9)-C(10)   | 175.7(2)    |
| C(8)-C(9)-C(10)-C(11)  | 1.7(3)      |
| C(8)-N(3)-C(11)-C(12)  | 177.0(2)    |
| Fe(1)-N(3)-C(11)-C(12) | -0.2(3)     |
| C(8)-N(3)-C(11)-C(10)  | -1.4(2)     |
| Fe(1)-N(3)-C(11)-C(10) | -178.51(15) |
| C(9)-C(10)-C(11)-N(3)  | -0.2(3)     |
| C(9)-C(10)-C(11)-C(12) | -178.6(2)   |
| N(3)-C(11)-C(12)-C(13) | 3.2(4)      |

|                         |             |
|-------------------------|-------------|
| C(10)-C(11)-C(12)-C(13) | -178.7(2)   |
| N(3)-C(11)-C(12)-C(33)  | -175.3(2)   |
| C(10)-C(11)-C(12)-C(33) | 2.8(3)      |
| C(16)-N(4)-C(13)-C(12)  | -179.4(2)   |
| Fe(1)-N(4)-C(13)-C(12)  | -0.6(3)     |
| C(16)-N(4)-C(13)-C(14)  | 0.9(3)      |
| Fe(1)-N(4)-C(13)-C(14)  | 179.64(16)  |
| C(11)-C(12)-C(13)-N(4)  | -2.8(4)     |
| C(33)-C(12)-C(13)-N(4)  | 175.7(2)    |
| C(11)-C(12)-C(13)-C(14) | 176.9(2)    |
| C(33)-C(12)-C(13)-C(14) | -4.5(3)     |
| N(4)-C(13)-C(14)-C(15)  | -0.8(3)     |
| C(12)-C(13)-C(14)-C(15) | 179.4(2)    |
| C(13)-C(14)-C(15)-C(16) | 0.4(3)      |
| C(13)-N(4)-C(16)-C(17)  | -179.9(2)   |
| Fe(1)-N(4)-C(16)-C(17)  | 1.3(3)      |
| C(13)-N(4)-C(16)-C(15)  | -0.6(3)     |
| Fe(1)-N(4)-C(16)-C(15)  | -179.41(16) |
| C(14)-C(15)-C(16)-N(4)  | 0.2(3)      |
| C(14)-C(15)-C(16)-C(17) | 179.5(2)    |
| N(4)-C(16)-C(17)-C(18)  | 2.6(4)      |
| C(15)-C(16)-C(17)-C(18) | -176.6(2)   |
| N(4)-C(16)-C(17)-C(39)  | -176.5(2)   |
| C(15)-C(16)-C(17)-C(39) | 4.3(3)      |
| C(16)-C(17)-C(18)-N(1)  | -3.4(4)     |
| C(39)-C(17)-C(18)-N(1)  | 175.7(2)    |
| C(16)-C(17)-C(18)-C(19) | 174.2(2)    |
| C(39)-C(17)-C(18)-C(19) | -6.8(4)     |
| C(1)-N(1)-C(18)-C(17)   | 177.0(2)    |
| Fe(1)-N(1)-C(18)-C(17)  | 0.2(3)      |
| C(1)-N(1)-C(18)-C(19)   | -0.8(3)     |
| Fe(1)-N(1)-C(18)-C(19)  | -177.60(16) |
| C(17)-C(18)-C(19)-C(20) | -175.8(2)   |
| N(1)-C(18)-C(19)-C(20)  | 2.0(3)      |
| C(18)-C(19)-C(20)-C(1)  | -2.3(3)     |
| N(1)-C(1)-C(20)-C(19)   | 1.9(3)      |
| C(2)-C(1)-C(20)-C(19)   | -177.6(2)   |
| C(1)-C(2)-C(21)-C(22)   | 72.9(3)     |
| C(3)-C(2)-C(21)-C(22)   | -109.3(3)   |
| C(1)-C(2)-C(21)-C(26)   | -106.0(3)   |
| C(3)-C(2)-C(21)-C(26)   | 71.8(3)     |
| C(26)-C(21)-C(22)-C(23) | -1.6(4)     |
| C(2)-C(21)-C(22)-C(23)  | 179.5(3)    |
| C(21)-C(22)-C(23)-C(24) | 1.5(5)      |
| C(22)-C(23)-C(24)-C(25) | -0.7(5)     |
| C(23)-C(24)-C(25)-C(26) | 0.0(4)      |
| C(24)-C(25)-C(26)-C(21) | -0.1(4)     |
| C(22)-C(21)-C(26)-C(25) | 0.9(4)      |
| C(2)-C(21)-C(26)-C(25)  | 179.8(2)    |
| C(6)-C(7)-C(27)-C(32)   | 111.9(3)    |

|                         |           |
|-------------------------|-----------|
| C(8)-C(7)-C(27)-C(32)   | -68.8(3)  |
| C(6)-C(7)-C(27)-C(28)   | -68.1(3)  |
| C(8)-C(7)-C(27)-C(28)   | 111.2(3)  |
| C(32)-C(27)-C(28)-C(29) | -0.4(4)   |
| C(7)-C(27)-C(28)-C(29)  | 179.6(3)  |
| C(27)-C(28)-C(29)-C(30) | 1.7(5)    |
| C(28)-C(29)-C(30)-C(31) | -1.2(5)   |
| C(29)-C(30)-C(31)-C(32) | -0.5(4)   |
| C(30)-C(31)-C(32)-C(27) | 1.8(4)    |
| C(28)-C(27)-C(32)-C(31) | -1.4(4)   |
| C(7)-C(27)-C(32)-C(31)  | 178.6(2)  |
| C(13)-C(12)-C(33)-C(34) | 116.1(3)  |
| C(11)-C(12)-C(33)-C(34) | -65.3(3)  |
| C(13)-C(12)-C(33)-C(38) | -61.6(3)  |
| C(11)-C(12)-C(33)-C(38) | 117.0(3)  |
| C(38)-C(33)-C(34)-C(35) | 0.7(4)    |
| C(12)-C(33)-C(34)-C(35) | -177.1(3) |
| C(33)-C(34)-C(35)-C(36) | -0.1(5)   |
| C(34)-C(35)-C(36)-C(37) | -0.2(5)   |
| C(35)-C(36)-C(37)-C(38) | -0.2(5)   |
| C(36)-C(37)-C(38)-C(33) | 0.9(4)    |
| C(34)-C(33)-C(38)-C(37) | -1.1(4)   |
| C(12)-C(33)-C(38)-C(37) | 176.7(2)  |
| C(18)-C(17)-C(39)-C(44) | -93.6(3)  |
| C(16)-C(17)-C(39)-C(44) | 85.6(3)   |
| C(18)-C(17)-C(39)-C(40) | 87.6(3)   |
| C(16)-C(17)-C(39)-C(40) | -93.3(3)  |
| C(44)-C(39)-C(40)-C(41) | -1.6(4)   |
| C(17)-C(39)-C(40)-C(41) | 177.3(3)  |
| C(39)-C(40)-C(41)-C(42) | -0.8(5)   |
| C(40)-C(41)-C(42)-C(43) | 2.0(5)    |
| C(41)-C(42)-C(43)-C(44) | -0.8(5)   |
| C(40)-C(39)-C(44)-C(43) | 2.8(5)    |
| C(17)-C(39)-C(44)-C(43) | -176.1(3) |
| C(42)-C(43)-C(44)-C(39) | -1.6(5)   |
| O(1)-N(5)-C(45)-C(46)   | -66.3(3)  |
| Fe(1)-N(5)-C(45)-C(46)  | 110.4(3)  |
| O(1)-N(5)-C(45)-C(47)   | 56.5(4)   |
| Fe(1)-N(5)-C(45)-C(47)  | -126.8(2) |
| N(5)-Fe(1)-O(2)-C(51)   | -13.0(18) |
| N(3)-Fe(1)-O(2)-C(51)   | -47.0(2)  |
| N(2)-Fe(1)-O(2)-C(51)   | 43.3(2)   |
| N(4)-Fe(1)-O(2)-C(51)   | -137.0(2) |
| N(1)-Fe(1)-O(2)-C(51)   | 133.2(2)  |
| N(5)-Fe(1)-O(2)-C(48)   | 135.4(17) |
| N(3)-Fe(1)-O(2)-C(48)   | 101.3(3)  |
| N(2)-Fe(1)-O(2)-C(48)   | -168.3(3) |
| N(4)-Fe(1)-O(2)-C(48)   | 11.3(3)   |
| N(1)-Fe(1)-O(2)-C(48)   | -78.5(3)  |
| C(51)-O(2)-C(48)-C(49)  | -24.4(4)  |



|                             |           |
|-----------------------------|-----------|
| Fe(1)-O(2)-C(48)-C(49)      | -177.4(2) |
| O(2)-C(48)-C(49)-C(50)      | -0.2(4)   |
| C(48)-C(49)-C(50)-C(51)     | 23.7(4)   |
| C(48)-O(2)-C(51)-C(50)      | 40.0(4)   |
| Fe(1)-O(2)-C(51)-C(50)      | -166.4(2) |
| C(49)-C(50)-C(51)-O(2)      | -39.0(4)  |
| C(48A)-C(49A)-C(50A)-C(51A) | -63.2(13) |

---

**Table S13.** Crystal data and structure refinement for [Fe(3,5-Me-BAFP)(iPrNO)<sub>2</sub>].

|                                             |                                                                                                |
|---------------------------------------------|------------------------------------------------------------------------------------------------|
| CCDC number                                 |                                                                                                |
| Empirical formula                           | C <sub>120.25</sub> H <sub>119.96</sub> Cl <sub>0.19</sub> FeN <sub>5.56</sub> O <sub>10</sub> |
| Formula weight                              | 1865.65                                                                                        |
| Temperature [K]                             | 150(2)                                                                                         |
| Crystal system                              | triclinic                                                                                      |
| Space group (number)                        | $P\bar{1}$ (2)                                                                                 |
| <i>a</i> [Å]                                | 12.688(7)                                                                                      |
| <i>b</i> [Å]                                | 14.426(7)                                                                                      |
| <i>c</i> [Å]                                | 16.484(10)                                                                                     |
| $\alpha$ [°]                                | 113.275(17)                                                                                    |
| $\beta$ [°]                                 | 111.806(15)                                                                                    |
| $\gamma$ [°]                                | 91.44(2)                                                                                       |
| Volume [Å <sup>3</sup> ]                    | 2521(2)                                                                                        |
| <i>Z</i>                                    | 1                                                                                              |
| $\rho_{\text{calc}}$ [gcm <sup>-3</sup> ]   | 1.229                                                                                          |
| $\mu$ [mm <sup>-1</sup> ]                   | 0.219                                                                                          |
| <i>F</i> (000)                              | 989.6                                                                                          |
| Crystal size [mm <sup>3</sup> ]             | 0.320×0.290×0.040                                                                              |
| Crystal colour                              | purple                                                                                         |
| Crystal shape                               | plate                                                                                          |
| Radiation                                   | MoK $\alpha$ ( $\lambda$ =0.71073 Å)                                                           |
| 2 $\theta$ range [°]                        | 4.22 to 56.88 (0.75 Å)                                                                         |
| Index ranges                                | -16 ≤ <i>h</i> ≤ 16<br>-19 ≤ <i>k</i> ≤ 17<br>-21 ≤ <i>l</i> ≤ 22                              |
| Reflections collected                       | 27632                                                                                          |
| Independent reflections                     | 12279<br>$R_{\text{int}} = 0.0940$<br>$R_{\text{sigma}} = 0.1347$                              |
| Completeness to<br>$\theta = 25.242^\circ$  | 98.6 %                                                                                         |
| Data / Restraints / Parameters              | 12279/222/705                                                                                  |
| Absorption correction                       | 0.6727/0.7457                                                                                  |
| T <sub>min</sub> /T <sub>max</sub> (method) | (multi-scan)                                                                                   |
| Goodness-of-fit on <i>F</i> <sup>2</sup>    | 1.003                                                                                          |
| Final <i>R</i> indexes                      | $R_1 = 0.0634$                                                                                 |
| [ $I \geq 2\sigma(I)$ ]                     | $wR_2 = 0.1379$                                                                                |
| Final <i>R</i> indexes                      | $R_1 = 0.1440$                                                                                 |
| [all data]                                  | $wR_2 = 0.1712$                                                                                |
| Largest peak/hole [eÅ <sup>-3</sup> ]       | 0.45/-0.42                                                                                     |

**Refinement details:**

The iPrNO ligand was found to be disordered with a THF molecule. Bond distances of THF were restrained to expected target values (1.45(2) Å for C-O and 1.51(2) Å for C-C bonds) and the molecule was assumed to be 2-fold symmetric (SAME command). U<sub>ij</sub> components of ADPs for disordered atoms closer to each other than 2.0 Å were restrained to be similar. Subject to these conditions, the occupancy ratio refined to 0.778(4) to 0.222(4). A solvate occupied area was refined as major hexanes and minor methylene chloride. The hexane molecule is inversion symmetric.

Bond distances of methylene chloride were restrained to expected target values (1.77(2) Å for C-Cl bonds and 2.90(2) Å for Cl...Cl).

**Table S14.** Atomic coordinates and  $U_{eq}$  [Å<sup>2</sup>] for [Fe(3,5-Me-BAFP)(iPrNO)<sub>2</sub>].

| Atom | <i>x</i>    | <i>y</i>    | <i>z</i>    | $U_{eq}$    |
|------|-------------|-------------|-------------|-------------|
| Fe1  | 0.500000    | 0.500000    | 0.500000    | 0.01872(14) |
| O5   | 0.4214(2)   | 0.6401(2)   | 0.4255(2)   | 0.0369(8)   |
| N3   | 0.4522(5)   | 0.5586(9)   | 0.4076(6)   | 0.0257(13)  |
| C55  | 0.4510(4)   | 0.5048(3)   | 0.3089(3)   | 0.0338(9)   |
| H55  | 0.476324    | 0.438058    | 0.302426    | 0.041       |
| C56  | 0.3292(5)   | 0.4809(4)   | 0.2346(4)   | 0.0535(15)  |
| H56A | 0.326792    | 0.443945    | 0.169436    | 0.080       |
| H56B | 0.301810    | 0.545262    | 0.240752    | 0.080       |
| H56C | 0.279109    | 0.437904    | 0.244857    | 0.080       |
| C57  | 0.5403(5)   | 0.5714(4)   | 0.3035(4)   | 0.0504(13)  |
| H57A | 0.548002    | 0.534766    | 0.242359    | 0.076       |
| H57B | 0.615222    | 0.586544    | 0.358169    | 0.076       |
| H57C | 0.515377    | 0.636022    | 0.306644    | 0.076       |
| O6   | 0.4547(16)  | 0.553(3)    | 0.396(2)    | 0.033(3)    |
| C58  | 0.3388(13)  | 0.5253(12)  | 0.3188(10)  | 0.045(3)    |
| H58A | 0.295409    | 0.580835    | 0.335505    | 0.054       |
| H58B | 0.295595    | 0.460968    | 0.309106    | 0.054       |
| C59  | 0.3535(16)  | 0.511(2)    | 0.2280(12)  | 0.062(4)    |
| H59A | 0.328599    | 0.566094    | 0.208797    | 0.074       |
| H59B | 0.307855    | 0.443299    | 0.173613    | 0.074       |
| C60  | 0.4819(15)  | 0.5148(16)  | 0.2554(12)  | 0.069(4)    |
| H60A | 0.509308    | 0.539842    | 0.217309    | 0.083       |
| H60B | 0.502789    | 0.447252    | 0.248412    | 0.083       |
| C61  | 0.5271(14)  | 0.5931(11)  | 0.3614(10)  | 0.042(3)    |
| H61A | 0.610025    | 0.595345    | 0.397416    | 0.051       |
| H61B | 0.516514    | 0.662925    | 0.367441    | 0.051       |
| O1   | 0.14173(16) | 0.28073(15) | 0.50210(14) | 0.0306(5)   |
| O2   | 0.05814(18) | 0.33783(17) | 0.22250(15) | 0.0354(5)   |
| O3   | 0.37185(19) | 0.87454(15) | 0.61011(15) | 0.0342(5)   |
| O4   | 0.4317(2)   | 0.72192(15) | 0.82367(15) | 0.0387(5)   |
| N1   | 0.41209(18) | 0.35989(15) | 0.39776(15) | 0.0189(5)   |
| N2   | 0.35836(18) | 0.53160(15) | 0.52417(15) | 0.0181(4)   |
| C1   | 0.4544(2)   | 0.28381(19) | 0.34391(19) | 0.0201(5)   |
| C2   | 0.3633(2)   | 0.1937(2)   | 0.2770(2)   | 0.0264(6)   |
| H2   | 0.369999    | 0.130983    | 0.231584    | 0.032       |
| C3   | 0.2671(2)   | 0.2154(2)   | 0.2912(2)   | 0.0256(6)   |
| H3   | 0.192976    | 0.171061    | 0.257337    | 0.031       |
| C4   | 0.2979(2)   | 0.31856(19) | 0.36730(18) | 0.0199(5)   |
| C5   | 0.2217(2)   | 0.36752(19) | 0.40443(18) | 0.0194(5)   |
| C6   | 0.2514(2)   | 0.46702(19) | 0.47844(18) | 0.0196(5)   |
| C7   | 0.1729(2)   | 0.5172(2)   | 0.5172(2)   | 0.0252(6)   |
| H7   | 0.094708    | 0.488217    | 0.498393    | 0.030       |
| C8   | 0.2309(2)   | 0.6131(2)   | 0.5853(2)   | 0.0241(6)   |

|      |            |             |             |            |
|------|------------|-------------|-------------|------------|
| H8   | 0.201421   | 0.664608    | 0.623164    | 0.029      |
| C9   | 0.3462(2)  | 0.62208(19) | 0.58942(19) | 0.0193(5)  |
| C10  | 0.4335(2)  | 0.70969(19) | 0.65129(19) | 0.0204(5)  |
| C11  | 0.1010(2)  | 0.30737(19) | 0.36127(19) | 0.0209(5)  |
| C12  | 0.0642(2)  | 0.2599(2)   | 0.4090(2)   | 0.0234(6)  |
| C13  | -0.0424(2) | 0.1935(2)   | 0.3641(2)   | 0.0303(7)  |
| H13  | -0.064495  | 0.160503    | 0.396701    | 0.036      |
| C14  | -0.1159(2) | 0.1761(2)   | 0.2707(2)   | 0.0326(7)  |
| H14  | -0.188628  | 0.130104    | 0.238898    | 0.039      |
| C15  | -0.0850(2) | 0.2247(2)   | 0.2232(2)   | 0.0322(7)  |
| H15  | -0.136624  | 0.213329    | 0.159624    | 0.039      |
| C16  | 0.0222(2)  | 0.2901(2)   | 0.2692(2)   | 0.0253(6)  |
| C17  | 0.0940(2)  | 0.2602(2)   | 0.5594(2)   | 0.0289(6)  |
| C18  | 0.0140(3)  | 0.3149(2)   | 0.5847(2)   | 0.0316(7)  |
| H18  | -0.006566  | 0.368196    | 0.565302    | 0.038      |
| C19  | -0.0362(3) | 0.2921(2)   | 0.6384(2)   | 0.0354(7)  |
| C20  | -0.0033(3) | 0.2134(3)   | 0.6656(2)   | 0.0389(8)  |
| H20  | -0.036842  | 0.197040    | 0.702290    | 0.047      |
| C21  | 0.0769(3)  | 0.1582(2)   | 0.6408(2)   | 0.0364(7)  |
| C22  | 0.1264(3)  | 0.1830(2)   | 0.5872(2)   | 0.0332(7)  |
| H22  | 0.182151   | 0.146850    | 0.569945    | 0.040      |
| C23  | -0.1268(3) | 0.3469(3)   | 0.6619(3)   | 0.0503(9)  |
| H23A | -0.116023  | 0.415113    | 0.663225    | 0.075      |
| H23B | -0.119973  | 0.354674    | 0.725527    | 0.075      |
| H23C | -0.203745  | 0.306965    | 0.612301    | 0.075      |
| C24  | 0.1055(4)  | 0.0677(3)   | 0.6640(3)   | 0.0583(11) |
| H24A | 0.170960   | 0.045213    | 0.648830    | 0.088      |
| H24B | 0.037963   | 0.010792    | 0.625089    | 0.088      |
| H24C | 0.126246   | 0.088570    | 0.733137    | 0.088      |
| H24D | 0.052486   | 0.051171    | 0.689207    | 0.088      |
| H24E | 0.185483   | 0.085591    | 0.712948    | 0.088      |
| H24F | 0.097200   | 0.007813    | 0.604900    | 0.088      |
| C25  | -0.0241(3) | 0.3742(2)   | 0.1658(2)   | 0.0349(7)  |
| C26  | -0.1003(3) | 0.4290(2)   | 0.1977(3)   | 0.0424(8)  |
| H26  | -0.101000  | 0.438967    | 0.258013    | 0.051      |
| C27  | -0.1758(3) | 0.4693(3)   | 0.1402(3)   | 0.0502(10) |
| C28  | -0.1738(3) | 0.4513(3)   | 0.0509(3)   | 0.0594(11) |
| H28  | -0.225307  | 0.478402    | 0.011410    | 0.071      |
| C29  | -0.0989(3) | 0.3952(3)   | 0.0185(3)   | 0.0553(10) |
| C30  | -0.0228(3) | 0.3571(3)   | 0.0773(2)   | 0.0414(8)  |
| H30  | 0.030210   | 0.319348    | 0.056939    | 0.050      |
| C31  | -0.2573(4) | 0.5306(3)   | 0.1748(4)   | 0.0752(14) |
| H31A | -0.325145  | 0.526458    | 0.118714    | 0.113      |
| H31B | -0.217631  | 0.602753    | 0.216578    | 0.113      |
| H31C | -0.282320  | 0.502636    | 0.211522    | 0.113      |
| C32  | -0.1010(4) | 0.3744(4)   | -0.0796(3)  | 0.0833(16) |
| H32A | -0.109250  | 0.300263    | -0.117050   | 0.125      |
| H32B | -0.028520  | 0.411136    | -0.070629   | 0.125      |
| H32C | -0.166535  | 0.398335    | -0.114727   | 0.125      |
| C33  | 0.4105(2)  | 0.80260(19) | 0.72070(19) | 0.0217(6)  |

|      |           |            |           |            |
|------|-----------|------------|-----------|------------|
| C34  | 0.3896(2) | 0.8885(2)  | 0.7018(2) | 0.0240(6)  |
| C35  | 0.3843(2) | 0.9802(2)  | 0.7716(2) | 0.0261(6)  |
| H35  | 0.371090  | 1.038119   | 0.758182  | 0.031      |
| C36  | 0.3986(2) | 0.9858(2)  | 0.8614(2) | 0.0272(6)  |
| H36  | 0.396909  | 1.048621   | 0.909900  | 0.033      |
| C37  | 0.4153(2) | 0.9009(2)  | 0.8812(2) | 0.0288(6)  |
| H37  | 0.423518  | 0.904773   | 0.942192  | 0.035      |
| C38  | 0.4199(2) | 0.8102(2)  | 0.8101(2) | 0.0248(6)  |
| C39  | 0.3932(3) | 0.9599(2)  | 0.5938(2) | 0.0326(7)  |
| C40  | 0.3089(3) | 0.9670(2)  | 0.5158(2) | 0.0350(7)  |
| H40  | 0.237119  | 0.919027   | 0.479579  | 0.042      |
| C41  | 0.3290(3) | 1.0446(3)  | 0.4898(3) | 0.0438(8)  |
| C42  | 0.4330(3) | 1.1149(3)  | 0.5455(3) | 0.0461(9)  |
| H42  | 0.446990  | 1.168356   | 0.528701  | 0.055      |
| C43  | 0.5177(3) | 1.1095(3)  | 0.6254(3) | 0.0440(9)  |
| C44  | 0.4974(3) | 1.0298(2)  | 0.6491(2) | 0.0382(8)  |
| H44  | 0.554711  | 1.023860   | 0.702694  | 0.046      |
| C45  | 0.2411(4) | 1.0499(3)  | 0.4015(3) | 0.0606(11) |
| H45A | 0.268332  | 1.026895   | 0.349698  | 0.091      |
| H45B | 0.230365  | 1.120985   | 0.417636  | 0.091      |
| H45C | 0.167121  | 1.005113   | 0.379540  | 0.091      |
| C46  | 0.6318(4) | 1.1857(3)  | 0.6844(3) | 0.0613(12) |
| H46A | 0.645878  | 1.216753   | 0.645178  | 0.092      |
| H46B | 0.694447  | 1.150034   | 0.703763  | 0.092      |
| H46C | 0.629139  | 1.239709   | 0.742420  | 0.092      |
| C47  | 0.5067(3) | 0.7338(2)  | 0.9158(2) | 0.0333(7)  |
| C48  | 0.4611(3) | 0.7185(3)  | 0.9745(2) | 0.0430(8)  |
| H48  | 0.379509  | 0.704550   | 0.954196  | 0.052      |
| C49  | 0.5357(4) | 0.7235(3)  | 1.0641(3) | 0.0517(10) |
| C50  | 0.6532(4) | 0.7436(3)  | 1.0902(3) | 0.0569(11) |
| H50  | 0.704509  | 0.746036   | 1.150491  | 0.068      |
| C51  | 0.6998(4) | 0.7604(4)  | 1.0320(3) | 0.0612(11) |
| C52  | 0.6241(3) | 0.7553(3)  | 0.9437(3) | 0.0492(9)  |
| H52  | 0.653481  | 0.766590   | 0.902435  | 0.059      |
| C53  | 0.4881(5) | 0.7069(4)  | 1.1303(3) | 0.0954(19) |
| H53A | 0.459021  | 0.633139   | 1.105591  | 0.143      |
| H53B | 0.424792  | 0.743999   | 1.132003  | 0.143      |
| H53C | 0.549876  | 0.732742   | 1.195910  | 0.143      |
| C54  | 0.8300(5) | 0.7844(7)  | 1.0637(4) | 0.132(3)   |
| H54A | 0.867043  | 0.743849   | 1.097922  | 0.197      |
| H54B | 0.860168  | 0.857958   | 1.107067  | 0.197      |
| H54C | 0.846615  | 0.766887   | 1.006451  | 0.197      |
| C62  | 0.0386(5) | -0.0340(4) | 0.0189(4) | 0.0952(19) |
| H62A | 0.039397  | -0.023568  | 0.082238  | 0.114      |
| H62B | 0.004221  | -0.107251  | -0.027009 | 0.114      |
| C63  | 0.1623(5) | -0.0109(4) | 0.0313(4) | 0.0861(17) |
| H63A | 0.196020  | 0.062985   | 0.075136  | 0.103      |
| H63B | 0.162173  | -0.024459  | -0.032504 | 0.103      |
| C64  | 0.2417(6) | -0.0790(5) | 0.0749(5) | 0.110(2)   |
| H64A | 0.214592  | -0.151652  | 0.027880  | 0.165      |

|      |          |            |           |           |
|------|----------|------------|-----------|-----------|
| H64B | 0.236707 | -0.070462  | 0.135295  | 0.165     |
| H64C | 0.322311 | -0.056394  | 0.088259  | 0.165     |
| C65  | 0.129(4) | -0.052(11) | 0.028(6)  | 0.098(6)  |
| H65A | 0.095546 | 0.010373   | 0.035568  | 0.118     |
| H65B | 0.075538 | -0.109908  | -0.033663 | 0.118     |
| C11  | 0.143(3) | -0.082(2)  | 0.126(2)  | 0.116(10) |
| C12  | 0.267(3) | -0.032(3)  | 0.028(2)  | 0.116(9)  |

$U_{\text{eq}}$  is defined as 1/3 of the trace of the orthogonalized  $U_{ij}$  tensor.

**Table S15.** Anisotropic displacement parameters [ $\text{\AA}^2$ ] for  $[\text{Fe}(3,5\text{-Me-BAFP})(\text{iPrNO})_2]$ .

The anisotropic displacement factor exponent takes the form:

$$-\pi^2 [h^2(a^*)^2 U_{11} + k^2(b^*)^2 U_{22} + \dots + 2hka^*b^* U_{12}].$$

| Atom | $U_{11}$   | $U_{22}$   | $U_{33}$   | $U_{23}$   | $U_{13}$   | $U_{12}$    |
|------|------------|------------|------------|------------|------------|-------------|
| Fe1  | 0.0175(3)  | 0.0160(3)  | 0.0194(3)  | 0.0047(2)  | 0.0077(2)  | 0.0015(2)   |
| O5   | 0.0453(17) | 0.0341(16) | 0.0382(16) | 0.0198(12) | 0.0194(14) | 0.0174(13)  |
| N3   | 0.0189(16) | 0.023(2)   | 0.031(3)   | 0.005(2)   | 0.0122(16) | 0.0043(15)  |
| C55  | 0.044(2)   | 0.037(2)   | 0.0301(19) | 0.0193(16) | 0.0197(17) | 0.0199(16)  |
| C56  | 0.062(3)   | 0.049(3)   | 0.037(3)   | 0.017(2)   | 0.010(2)   | 0.001(3)    |
| C57  | 0.060(3)   | 0.061(3)   | 0.050(3)   | 0.031(3)   | 0.035(3)   | 0.015(3)    |
| O6   | 0.033(4)   | 0.034(5)   | 0.033(5)   | 0.013(4)   | 0.015(4)   | 0.007(4)    |
| C58  | 0.045(4)   | 0.039(4)   | 0.035(4)   | 0.012(4)   | 0.005(4)   | 0.014(4)    |
| C59  | 0.062(6)   | 0.055(6)   | 0.045(6)   | 0.017(5)   | 0.004(5)   | 0.013(5)    |
| C60  | 0.065(5)   | 0.061(5)   | 0.057(5)   | 0.017(5)   | 0.010(5)   | 0.011(5)    |
| C61  | 0.044(4)   | 0.045(4)   | 0.043(4)   | 0.027(4)   | 0.015(4)   | 0.011(4)    |
| O1   | 0.0227(10) | 0.0379(11) | 0.0334(11) | 0.0196(9)  | 0.0100(9)  | 0.0032(9)   |
| O2   | 0.0262(11) | 0.0485(13) | 0.0329(12) | 0.0223(10) | 0.0091(10) | 0.0041(9)   |
| O3   | 0.0498(13) | 0.0239(10) | 0.0310(11) | 0.0133(9)  | 0.0172(10) | 0.0081(9)   |
| O4   | 0.0601(15) | 0.0200(10) | 0.0249(11) | 0.0077(8)  | 0.0086(11) | 0.0044(10)  |
| N1   | 0.0181(11) | 0.0160(10) | 0.0203(11) | 0.0063(9)  | 0.0074(9)  | 0.0029(8)   |
| N2   | 0.0171(11) | 0.0156(10) | 0.0202(11) | 0.0066(8)  | 0.0078(9)  | 0.0018(8)   |
| C1   | 0.0198(13) | 0.0153(12) | 0.0219(13) | 0.0064(10) | 0.0072(11) | 0.0035(10)  |
| C2   | 0.0246(14) | 0.0175(13) | 0.0270(15) | 0.0023(11) | 0.0084(12) | 0.0022(11)  |
| C3   | 0.0188(13) | 0.0185(13) | 0.0287(15) | 0.0034(11) | 0.0067(12) | 0.0001(10)  |
| C4   | 0.0175(12) | 0.0167(12) | 0.0210(13) | 0.0056(10) | 0.0065(11) | -0.0003(10) |
| C5   | 0.0154(12) | 0.0176(12) | 0.0206(13) | 0.0065(10) | 0.0050(11) | 0.0002(9)   |
| C6   | 0.0162(12) | 0.0188(12) | 0.0212(13) | 0.0069(10) | 0.0072(11) | 0.0026(10)  |
| C7   | 0.0187(13) | 0.0246(14) | 0.0306(15) | 0.0092(11) | 0.0115(12) | 0.0057(11)  |
| C8   | 0.0177(13) | 0.0203(13) | 0.0312(15) | 0.0074(11) | 0.0112(12) | 0.0045(10)  |
| C9   | 0.0177(12) | 0.0172(12) | 0.0235(13) | 0.0079(10) | 0.0098(11) | 0.0066(10)  |
| C10  | 0.0243(13) | 0.0155(12) | 0.0201(13) | 0.0068(10) | 0.0089(11) | 0.0059(10)  |
| C11  | 0.0159(12) | 0.0183(13) | 0.0252(14) | 0.0065(10) | 0.0086(11) | 0.0023(10)  |
| C12  | 0.0214(13) | 0.0206(13) | 0.0267(14) | 0.0091(11) | 0.0098(12) | 0.0057(10)  |
| C13  | 0.0263(15) | 0.0241(14) | 0.0426(18) | 0.0139(13) | 0.0173(14) | 0.0025(12)  |
| C14  | 0.0215(14) | 0.0244(15) | 0.0385(17) | 0.0047(13) | 0.0088(14) | -0.0020(12) |
| C15  | 0.0196(14) | 0.0372(17) | 0.0270(15) | 0.0073(13) | 0.0041(12) | 0.0006(12)  |
| C16  | 0.0231(14) | 0.0253(14) | 0.0250(14) | 0.0081(11) | 0.0105(12) | 0.0032(11)  |
| C17  | 0.0260(15) | 0.0308(15) | 0.0291(15) | 0.0149(12) | 0.0089(13) | 0.0008(12)  |
| C18  | 0.0324(16) | 0.0303(15) | 0.0348(17) | 0.0171(13) | 0.0136(14) | 0.0065(12)  |

|     |            |            |            |            |            |            |
|-----|------------|------------|------------|------------|------------|------------|
| C19 | 0.0334(17) | 0.0365(17) | 0.0354(17) | 0.0144(14) | 0.0148(15) | 0.0036(13) |
| C20 | 0.0376(18) | 0.0419(18) | 0.0405(18) | 0.0209(15) | 0.0168(16) | 0.0031(15) |
| C21 | 0.0369(18) | 0.0360(17) | 0.0393(18) | 0.0241(15) | 0.0107(15) | 0.0049(14) |
| C22 | 0.0294(16) | 0.0326(16) | 0.0384(17) | 0.0175(14) | 0.0127(14) | 0.0074(13) |
| C23 | 0.046(2)   | 0.054(2)   | 0.061(2)   | 0.0258(19) | 0.032(2)   | 0.0120(17) |
| C24 | 0.065(3)   | 0.057(2)   | 0.076(3)   | 0.047(2)   | 0.033(2)   | 0.018(2)   |
| C25 | 0.0277(16) | 0.0340(16) | 0.0355(17) | 0.0160(14) | 0.0049(14) | 0.0004(13) |
| C26 | 0.0367(18) | 0.0375(18) | 0.045(2)   | 0.0134(15) | 0.0138(16) | 0.0065(15) |
| C27 | 0.0339(19) | 0.0332(18) | 0.070(3)   | 0.0190(18) | 0.0109(18) | 0.0035(15) |
| C28 | 0.043(2)   | 0.060(2)   | 0.070(3)   | 0.042(2)   | 0.003(2)   | 0.0024(19) |
| C29 | 0.048(2)   | 0.065(3)   | 0.047(2)   | 0.034(2)   | 0.0054(19) | -0.003(2)  |
| C30 | 0.0355(18) | 0.050(2)   | 0.0356(18) | 0.0192(15) | 0.0114(15) | 0.0031(15) |
| C31 | 0.054(3)   | 0.050(2)   | 0.103(4)   | 0.025(2)   | 0.022(3)   | 0.022(2)   |
| C32 | 0.079(3)   | 0.118(4)   | 0.053(3)   | 0.056(3)   | 0.008(2)   | -0.002(3)  |
| C33 | 0.0159(12) | 0.0178(13) | 0.0261(14) | 0.0047(10) | 0.0087(11) | 0.0025(10) |
| C34 | 0.0222(13) | 0.0222(14) | 0.0246(14) | 0.0077(11) | 0.0094(12) | 0.0035(11) |
| C35 | 0.0212(14) | 0.0181(13) | 0.0339(16) | 0.0077(11) | 0.0100(12) | 0.0054(10) |
| C36 | 0.0202(13) | 0.0223(14) | 0.0257(14) | 0.0014(11) | 0.0054(12) | 0.0032(11) |
| C37 | 0.0287(15) | 0.0268(15) | 0.0216(14) | 0.0025(11) | 0.0098(13) | 0.0006(12) |
| C38 | 0.0226(14) | 0.0216(13) | 0.0248(14) | 0.0073(11) | 0.0074(12) | 0.0038(11) |
| C39 | 0.0429(18) | 0.0251(15) | 0.0374(17) | 0.0143(13) | 0.0233(15) | 0.0110(13) |
| C40 | 0.0397(18) | 0.0345(17) | 0.0390(18) | 0.0198(14) | 0.0205(16) | 0.0133(14) |
| C41 | 0.059(2)   | 0.0418(19) | 0.051(2)   | 0.0286(16) | 0.0335(19) | 0.0248(17) |
| C42 | 0.066(2)   | 0.0345(18) | 0.062(2)   | 0.0294(17) | 0.042(2)   | 0.0196(17) |
| C43 | 0.052(2)   | 0.0337(18) | 0.058(2)   | 0.0189(16) | 0.036(2)   | 0.0081(15) |
| C44 | 0.0401(18) | 0.0356(17) | 0.0429(19) | 0.0175(15) | 0.0206(16) | 0.0120(14) |
| C45 | 0.080(3)   | 0.067(3)   | 0.063(3)   | 0.046(2)   | 0.038(2)   | 0.040(2)   |
| C46 | 0.064(3)   | 0.038(2)   | 0.089(3)   | 0.022(2)   | 0.046(3)   | 0.0036(18) |
| C47 | 0.0493(19) | 0.0216(14) | 0.0266(15) | 0.0110(12) | 0.0125(15) | 0.0121(13) |
| C48 | 0.052(2)   | 0.0387(18) | 0.0368(18) | 0.0163(15) | 0.0170(17) | 0.0010(16) |
| C49 | 0.079(3)   | 0.040(2)   | 0.037(2)   | 0.0208(16) | 0.021(2)   | 0.0055(19) |
| C50 | 0.079(3)   | 0.050(2)   | 0.036(2)   | 0.0234(17) | 0.012(2)   | 0.027(2)   |
| C51 | 0.054(2)   | 0.080(3)   | 0.045(2)   | 0.023(2)   | 0.019(2)   | 0.033(2)   |
| C52 | 0.055(2)   | 0.059(2)   | 0.0378(19) | 0.0198(17) | 0.0244(18) | 0.0226(19) |
| C53 | 0.126(5)   | 0.109(4)   | 0.053(3)   | 0.045(3)   | 0.032(3)   | -0.018(4)  |
| C54 | 0.059(3)   | 0.237(8)   | 0.087(4)   | 0.061(5)   | 0.027(3)   | 0.058(4)   |
| C62 | 0.086(4)   | 0.073(3)   | 0.079(3)   | 0.014(3)   | 0.007(3)   | -0.002(3)  |
| C63 | 0.071(3)   | 0.066(3)   | 0.067(3)   | -0.001(3)  | 0.007(3)   | -0.002(3)  |
| C64 | 0.108(5)   | 0.068(4)   | 0.085(4)   | 0.009(3)   | -0.001(4)  | -0.005(3)  |
| C65 | 0.087(7)   | 0.072(7)   | 0.078(7)   | 0.004(7)   | 0.007(7)   | -0.001(7)  |
| CI1 | 0.125(14)  | 0.076(12)  | 0.085(12)  | 0.000(11)  | 0.018(12)  | -0.007(12) |
| CI2 | 0.103(11)  | 0.084(11)  | 0.094(11)  | 0.012(10)  | 0.004(10)  | -0.003(10) |

**Table S16.** Bond lengths and angles for [Fe(3,5-Me-BAFP)(iPrNO)<sub>2</sub>].

| <u>.Atom–Atom</u>    | <u>Length [Å]</u> |
|----------------------|-------------------|
| Fe1–N3               | 1.940(10)         |
| Fe1–N3 <sup>#1</sup> | 1.940(10)         |
| Fe1–N1               | 1.992(2)          |
| Fe1–N1 <sup>#1</sup> | 1.992(2)          |
| Fe1–N2 <sup>#1</sup> | 2.007(2)          |
| Fe1–N2               | 2.007(2)          |
| Fe1–O6               | 2.05(3)           |
| Fe1–O6 <sup>#1</sup> | 2.05(3)           |
| O5–N3                | 1.207(13)         |
| N3–C55               | 1.494(10)         |
| C55–C56              | 1.498(7)          |
| C55–C57              | 1.517(6)          |
| C55–H55              | 1.0000            |
| C56–H56A             | 0.9800            |
| C56–H56B             | 0.9800            |
| C56–H56C             | 0.9800            |
| C57–H57A             | 0.9800            |
| C57–H57B             | 0.9800            |
| C57–H57C             | 0.9800            |
| O6–C58               | 1.454(16)         |
| O6–C61               | 1.455(16)         |
| C58–C59              | 1.509(14)         |
| C58–H58A             | 0.9900            |
| C58–H58B             | 0.9900            |
| C59–C60              | 1.512(18)         |
| C59–H59A             | 0.9900            |
| C59–H59B             | 0.9900            |
| C60–C61              | 1.524(14)         |
| C60–H60A             | 0.9900            |
| C60–H60B             | 0.9900            |
| C61–H61A             | 0.9900            |
| C61–H61B             | 0.9900            |
| O1–C12               | 1.383(3)          |
| O1–C17               | 1.409(3)          |
| O2–C25               | 1.389(4)          |
| O2–C16               | 1.392(3)          |
| O3–C34               | 1.371(3)          |
| O3–C39               | 1.400(4)          |
| O4–C38               | 1.380(4)          |
| O4–C47               | 1.398(4)          |
| N1–C4                | 1.373(3)          |
| N1–C1                | 1.377(3)          |
| N2–C6                | 1.378(3)          |
| N2–C9                | 1.381(3)          |
| C1–C10 <sup>#1</sup> | 1.393(4)          |
| C1–C2                | 1.444(4)          |
| C2–C3                | 1.348(4)          |
| C2–H2                | 0.9500            |



|          |          |
|----------|----------|
| C3-C4    | 1.440(3) |
| C3-H3    | 0.9500   |
| C4-C5    | 1.394(4) |
| C5-C6    | 1.392(3) |
| C5-C11   | 1.496(3) |
| C6-C7    | 1.439(4) |
| C7-C8    | 1.351(4) |
| C7-H7    | 0.9500   |
| C8-C9    | 1.439(4) |
| C8-H8    | 0.9500   |
| C9-C10   | 1.392(4) |
| C10-C33  | 1.499(3) |
| C11-C16  | 1.388(4) |
| C11-C12  | 1.411(4) |
| C12-C13  | 1.387(4) |
| C13-C14  | 1.385(4) |
| C13-H13  | 0.9500   |
| C14-C15  | 1.381(4) |
| C14-H14  | 0.9500   |
| C15-C16  | 1.385(4) |
| C15-H15  | 0.9500   |
| C17-C22  | 1.380(4) |
| C17-C18  | 1.386(4) |
| C18-C19  | 1.391(4) |
| C18-H18  | 0.9500   |
| C19-C20  | 1.398(5) |
| C19-C23  | 1.493(5) |
| C20-C21  | 1.388(5) |
| C20-H20  | 0.9500   |
| C21-C22  | 1.398(4) |
| C21-C24  | 1.516(5) |
| C22-H22  | 0.9500   |
| C23-H23A | 0.9800   |
| C23-H23B | 0.9800   |
| C23-H23C | 0.9800   |
| C24-H24A | 0.9800   |
| C24-H24B | 0.9800   |
| C24-H24C | 0.9800   |
| C24-H24D | 0.9800   |
| C24-H24E | 0.9800   |
| C24-H24F | 0.9800   |
| C25-C30  | 1.387(5) |
| C25-C26  | 1.387(5) |
| C26-C27  | 1.394(5) |
| C26-H26  | 0.9500   |
| C27-C28  | 1.400(6) |
| C27-C31  | 1.504(5) |
| C28-C29  | 1.384(6) |
| C28-H28  | 0.9500   |

|          |          |
|----------|----------|
| C29-C30  | 1.388(5) |
| C29-C32  | 1.514(6) |
| C30-H30  | 0.9500   |
| C31-H31A | 0.9800   |
| C31-H31B | 0.9800   |
| C31-H31C | 0.9800   |
| C32-H32A | 0.9800   |
| C32-H32B | 0.9800   |
| C32-H32C | 0.9800   |
| C33-C38  | 1.392(4) |
| C33-C34  | 1.402(4) |
| C34-C35  | 1.392(4) |
| C35-C36  | 1.391(4) |
| C35-H35  | 0.9500   |
| C36-C37  | 1.389(4) |
| C36-H36  | 0.9500   |
| C37-C38  | 1.390(4) |
| C37-H37  | 0.9500   |
| C39-C40  | 1.377(5) |
| C39-C44  | 1.382(5) |
| C40-C41  | 1.395(5) |
| C40-H40  | 0.9500   |
| C41-C42  | 1.382(5) |
| C41-C45  | 1.502(5) |
| C42-C43  | 1.388(5) |
| C42-H42  | 0.9500   |
| C43-C44  | 1.399(5) |
| C43-C46  | 1.509(5) |
| C44-H44  | 0.9500   |
| C45-H45A | 0.9800   |
| C45-H45B | 0.9800   |
| C45-H45C | 0.9800   |
| C46-H46A | 0.9800   |
| C46-H46B | 0.9800   |
| C46-H46C | 0.9800   |
| C47-C52  | 1.372(5) |
| C47-C48  | 1.377(5) |
| C48-C49  | 1.399(5) |
| C48-H48  | 0.9500   |
| C49-C50  | 1.377(6) |
| C49-C53  | 1.516(6) |
| C50-C51  | 1.389(6) |
| C50-H50  | 0.9500   |
| C51-C52  | 1.384(5) |
| C51-C54  | 1.519(7) |
| C52-H52  | 0.9500   |
| C53-H53A | 0.9800   |
| C53-H53B | 0.9800   |
| C53-H53C | 0.9800   |
| C54-H54A | 0.9800   |

|                       |           |
|-----------------------|-----------|
| C54–H54B              | 0.9800    |
| C54–H54C              | 0.9800    |
| C62–C63               | 1.516(8)  |
| C62–C62 <sup>#2</sup> | 1.545(11) |
| C62–H62A              | 0.9900    |
| C62–H62B              | 0.9900    |
| C63–C64               | 1.601(8)  |
| C63–H63A              | 0.9900    |
| C63–H63B              | 0.9900    |
| C64–H64A              | 0.9800    |
| C64–H64B              | 0.9800    |
| C64–H64C              | 0.9800    |
| C65–Cl1               | 1.76(2)   |
| C65–Cl2               | 1.77(2)   |
| C65–H65A              | 0.9900    |
| C65–H65B              | 0.9900    |

| <b>Atom–Atom–<br/>Atom</b> | <b>Angle [°]</b> |
|----------------------------|------------------|
|----------------------------|------------------|

|             |           |
|-------------|-----------|
| N3–Fe1–N3   | 180.0     |
| N3–Fe1–N1   | 92.0(3)   |
| N3–Fe1–N1   | 88.0(3)   |
| N3–Fe1–N1   | 88.0(3)   |
| N3–Fe1–N1   | 92.0(3)   |
| N1–Fe1–N1   | 180.0     |
| N3–Fe1–N2   | 91.9(2)   |
| N3–Fe1–N2   | 88.1(2)   |
| N1–Fe1–N2   | 89.93(9)  |
| N1–Fe1–N2   | 90.07(9)  |
| N3–Fe1–N2   | 88.1(2)   |
| N3–Fe1–N2   | 91.9(2)   |
| N1–Fe1–N2   | 90.07(9)  |
| N1–Fe1–N2   | 89.93(9)  |
| N2–Fe1–N2   | 180.0     |
| N1–Fe1–O6   | 89.3(10)  |
| N1–Fe1–O6   | 90.7(10)  |
| N2–Fe1–O6   | 88.1(8)   |
| N2–Fe1–O6   | 91.9(8)   |
| N3–Fe1–O6   | 175.3(14) |
| N3–Fe1–O6   | 4.7(14)   |
| N1–Fe1–O6   | 90.7(10)  |
| N1–Fe1–O6   | 89.3(10)  |
| N2–Fe1–O6   | 91.9(8)   |
| N2–Fe1–O6   | 88.1(8)   |
| O5–N3–C55   | 115.7(8)  |
| O5–N3–Fe1   | 122.6(6)  |
| C55–N3–Fe1  | 121.6(8)  |
| N3–C55–C56  | 108.6(5)  |
| N3–C55–C57  | 107.4(5)  |
| C56–C55–C57 | 116.4(4)  |

|               |            |
|---------------|------------|
| N3-C55-H55    | 108.1      |
| C56-C55-H55   | 108.1      |
| C57-C55-H55   | 108.1      |
| C55-C56-H56A  | 109.5      |
| C55-C56-H56B  | 109.5      |
| H56A-C56-H56B | 109.5      |
| C55-C56-H56C  | 109.5      |
| H56A-C56-H56C | 109.5      |
| H56B-C56-H56C | 109.5      |
| C55-C57-H57A  | 109.5      |
| C55-C57-H57B  | 109.5      |
| H57A-C57-H57B | 109.5      |
| C55-C57-H57C  | 109.5      |
| H57A-C57-H57C | 109.5      |
| H57B-C57-H57C | 109.5      |
| C58-O6-C61    | 104.0(19)  |
| C58-O6-Fe1    | 123.6(16)  |
| C61-O6-Fe1    | 129.8(16)  |
| O6-C58-C59    | 106.6(15)  |
| O6-C58-H58A   | 110.4      |
| C59-C58-H58A  | 110.4      |
| O6-C58-H58B   | 110.4      |
| C59-C58-H58B  | 110.4      |
| H58A-C58-H58B | 108.6      |
| C58-C59-C60   | 104.6(11)  |
| C58-C59-H59A  | 110.8      |
| C60-C59-H59A  | 110.8      |
| C58-C59-H59B  | 110.8      |
| C60-C59-H59B  | 110.8      |
| H59A-C59-H59B | 108.9      |
| C59-C60-C61   | 98.6(11)   |
| C59-C60-H60A  | 112.0      |
| C61-C60-H60A  | 112.0      |
| C59-C60-H60B  | 112.0      |
| C61-C60-H60B  | 112.0      |
| H60A-C60-H60B | 109.7      |
| O6-C61-C60    | 102.1(17)  |
| O6-C61-H61A   | 111.4      |
| C60-C61-H61A  | 111.4      |
| O6-C61-H61B   | 111.4      |
| C60-C61-H61B  | 111.4      |
| H61A-C61-H61B | 109.2      |
| C12-O1-C17    | 115.7(2)   |
| C25-O2-C16    | 117.4(2)   |
| C34-O3-C39    | 119.6(2)   |
| C38-O4-C47    | 117.1(2)   |
| C4-N1-C1      | 105.8(2)   |
| C4-N1-Fe1     | 127.47(17) |
| C1-N1-Fe1     | 126.74(17) |
| C6-N2-C9      | 105.0(2)   |

|             |            |
|-------------|------------|
| C6-N2-Fe1   | 127.07(16) |
| C9-N2-Fe1   | 127.92(16) |
| N1-C1-C10   | 126.8(2)   |
| N1-C1-C2    | 109.8(2)   |
| C10-C1-C2   | 123.3(2)   |
| C3-C2-C1    | 107.1(2)   |
| C3-C2-H2    | 126.4      |
| C1-C2-H2    | 126.4      |
| C2-C3-C4    | 107.0(2)   |
| C2-C3-H3    | 126.5      |
| C4-C3-H3    | 126.5      |
| N1-C4-C5    | 125.7(2)   |
| N1-C4-C3    | 110.3(2)   |
| C5-C4-C3    | 124.0(2)   |
| C6-C5-C4    | 124.1(2)   |
| C6-C5-C11   | 119.1(2)   |
| C4-C5-C11   | 116.8(2)   |
| N2-C6-C5    | 125.5(2)   |
| N2-C6-C7    | 110.4(2)   |
| C5-C6-C7    | 124.1(2)   |
| C8-C7-C6    | 107.2(2)   |
| C8-C7-H7    | 126.4      |
| C6-C7-H7    | 126.4      |
| C7-C8-C9    | 106.6(2)   |
| C7-C8-H8    | 126.7      |
| C9-C8-H8    | 126.7      |
| N2-C9-C10   | 124.8(2)   |
| N2-C9-C8    | 110.7(2)   |
| C10-C9-C8   | 124.5(2)   |
| C9-C10-C1   | 123.8(2)   |
| C9-C10-C33  | 119.8(2)   |
| C1-C10-C33  | 116.3(2)   |
| C16-C11-C12 | 116.7(2)   |
| C16-C11-C5  | 121.3(2)   |
| C12-C11-C5  | 121.9(2)   |
| O1-C12-C13  | 121.8(3)   |
| O1-C12-C11  | 116.3(2)   |
| C13-C12-C11 | 121.9(3)   |
| C14-C13-C12 | 118.8(3)   |
| C14-C13-H13 | 120.6      |
| C12-C13-H13 | 120.6      |
| C15-C14-C13 | 121.0(3)   |
| C15-C14-H14 | 119.5      |
| C13-C14-H14 | 119.5      |
| C14-C15-C16 | 119.2(3)   |
| C14-C15-H15 | 120.4      |
| C16-C15-H15 | 120.4      |
| C15-C16-C11 | 122.2(3)   |
| C15-C16-O2  | 121.0(3)   |
| C11-C16-O2  | 116.7(2)   |

|               |          |
|---------------|----------|
| C22-C17-C18   | 121.3(3) |
| C22-C17-O1    | 118.5(3) |
| C18-C17-O1    | 120.2(3) |
| C17-C18-C19   | 120.2(3) |
| C17-C18-H18   | 119.9    |
| C19-C18-H18   | 119.9    |
| C18-C19-C20   | 118.0(3) |
| C18-C19-C23   | 120.7(3) |
| C20-C19-C23   | 121.2(3) |
| C21-C20-C19   | 122.2(3) |
| C21-C20-H20   | 118.9    |
| C19-C20-H20   | 118.9    |
| C20-C21-C22   | 118.6(3) |
| C20-C21-C24   | 121.9(3) |
| C22-C21-C24   | 119.3(3) |
| C17-C22-C21   | 119.6(3) |
| C17-C22-H22   | 120.2    |
| C21-C22-H22   | 120.2    |
| C19-C23-H23A  | 109.5    |
| C19-C23-H23B  | 109.5    |
| H23A-C23-H23B | 109.5    |
| C19-C23-H23C  | 109.5    |
| H23A-C23-H23C | 109.5    |
| H23B-C23-H23C | 109.5    |
| C21-C24-H24A  | 109.5    |
| C21-C24-H24B  | 109.5    |
| H24A-C24-H24B | 109.5    |
| C21-C24-H24C  | 109.5    |
| H24A-C24-H24C | 109.5    |
| H24B-C24-H24C | 109.5    |
| C21-C24-H24D  | 109.5    |
| H24A-C24-H24D | 141.1    |
| H24B-C24-H24D | 56.3     |
| H24C-C24-H24D | 56.3     |
| C21-C24-H24E  | 109.5    |
| H24A-C24-H24E | 56.3     |
| H24B-C24-H24E | 141.1    |
| H24C-C24-H24E | 56.3     |
| H24D-C24-H24E | 109.5    |
| C21-C24-H24F  | 109.5    |
| H24A-C24-H24F | 56.3     |
| H24B-C24-H24F | 56.3     |
| H24C-C24-H24F | 141.1    |
| H24D-C24-H24F | 109.5    |
| H24E-C24-H24F | 109.5    |
| C30-C25-C26   | 121.6(3) |
| C30-C25-O2    | 116.5(3) |
| C26-C25-O2    | 121.8(3) |
| C25-C26-C27   | 119.1(3) |
| C25-C26-H26   | 120.4    |

|               |          |
|---------------|----------|
| C27-C26-H26   | 120.4    |
| C26-C27-C28   | 118.8(4) |
| C26-C27-C31   | 119.7(4) |
| C28-C27-C31   | 121.5(4) |
| C29-C28-C27   | 122.0(4) |
| C29-C28-H28   | 119.0    |
| C27-C28-H28   | 119.0    |
| C28-C29-C30   | 118.7(4) |
| C28-C29-C32   | 120.8(4) |
| C30-C29-C32   | 120.5(4) |
| C25-C30-C29   | 119.9(3) |
| C25-C30-H30   | 120.1    |
| C29-C30-H30   | 120.1    |
| C27-C31-H31A  | 109.5    |
| C27-C31-H31B  | 109.5    |
| H31A-C31-H31B | 109.5    |
| C27-C31-H31C  | 109.5    |
| H31A-C31-H31C | 109.5    |
| H31B-C31-H31C | 109.5    |
| C29-C32-H32A  | 109.5    |
| C29-C32-H32B  | 109.5    |
| H32A-C32-H32B | 109.5    |
| C29-C32-H32C  | 109.5    |
| H32A-C32-H32C | 109.5    |
| H32B-C32-H32C | 109.5    |
| C38-C33-C34   | 117.7(2) |
| C38-C33-C10   | 121.0(2) |
| C34-C33-C10   | 121.1(2) |
| O3-C34-C35    | 123.2(3) |
| O3-C34-C33    | 115.5(2) |
| C35-C34-C33   | 121.3(3) |
| C36-C35-C34   | 119.1(3) |
| C36-C35-H35   | 120.4    |
| C34-C35-H35   | 120.4    |
| C37-C36-C35   | 121.0(2) |
| C37-C36-H36   | 119.5    |
| C35-C36-H36   | 119.5    |
| C36-C37-C38   | 118.7(3) |
| C36-C37-H37   | 120.6    |
| C38-C37-H37   | 120.6    |
| O4-C38-C37    | 121.6(3) |
| O4-C38-C33    | 116.3(2) |
| C37-C38-C33   | 122.1(3) |
| C40-C39-C44   | 121.3(3) |
| C40-C39-O3    | 117.0(3) |
| C44-C39-O3    | 121.5(3) |
| C39-C40-C41   | 120.0(3) |
| C39-C40-H40   | 120.0    |
| C41-C40-H40   | 120.0    |
| C42-C41-C40   | 118.6(3) |

|               |          |
|---------------|----------|
| C42-C41-C45   | 120.6(3) |
| C40-C41-C45   | 120.8(4) |
| C41-C42-C43   | 121.9(3) |
| C41-C42-H42   | 119.1    |
| C43-C42-H42   | 119.1    |
| C42-C43-C44   | 118.8(3) |
| C42-C43-C46   | 121.2(3) |
| C44-C43-C46   | 119.9(4) |
| C39-C44-C43   | 119.3(3) |
| C39-C44-H44   | 120.3    |
| C43-C44-H44   | 120.3    |
| C41-C45-H45A  | 109.5    |
| C41-C45-H45B  | 109.5    |
| H45A-C45-H45B | 109.5    |
| C41-C45-H45C  | 109.5    |
| H45A-C45-H45C | 109.5    |
| H45B-C45-H45C | 109.5    |
| C43-C46-H46A  | 109.5    |
| C43-C46-H46B  | 109.5    |
| H46A-C46-H46B | 109.5    |
| C43-C46-H46C  | 109.5    |
| H46A-C46-H46C | 109.5    |
| H46B-C46-H46C | 109.5    |
| C52-C47-C48   | 121.5(3) |
| C52-C47-O4    | 119.2(3) |
| C48-C47-O4    | 119.2(3) |
| C47-C48-C49   | 119.5(4) |
| C47-C48-H48   | 120.2    |
| C49-C48-H48   | 120.2    |
| C50-C49-C48   | 118.1(3) |
| C50-C49-C53   | 121.1(4) |
| C48-C49-C53   | 120.8(4) |
| C49-C50-C51   | 122.6(4) |
| C49-C50-H50   | 118.7    |
| C51-C50-H50   | 118.7    |
| C52-C51-C50   | 118.1(4) |
| C52-C51-C54   | 120.5(4) |
| C50-C51-C54   | 121.4(4) |
| C47-C52-C51   | 120.1(4) |
| C47-C52-H52   | 120.0    |
| C51-C52-H52   | 120.0    |
| C49-C53-H53A  | 109.5    |
| C49-C53-H53B  | 109.5    |
| H53A-C53-H53B | 109.5    |
| C49-C53-H53C  | 109.5    |
| H53A-C53-H53C | 109.5    |
| H53B-C53-H53C | 109.5    |
| C51-C54-H54A  | 109.5    |
| C51-C54-H54B  | 109.5    |
| H54A-C54-H54B | 109.5    |



|               |           |
|---------------|-----------|
| C51-C54-H54C  | 109.5     |
| H54A-C54-H54C | 109.5     |
| H54B-C54-H54C | 109.5     |
| C63-C62-C62   | 113.4(7)  |
| C63-C62-H62A  | 108.9     |
| C62-C62-H62A  | 108.9     |
| C63-C62-H62B  | 108.9     |
| C62-C62-H62B  | 108.9     |
| H62A-C62-H62B | 107.7     |
| C62-C63-C64   | 112.3(6)  |
| C62-C63-H63A  | 109.2     |
| C64-C63-H63A  | 109.2     |
| C62-C63-H63B  | 109.2     |
| C64-C63-H63B  | 109.2     |
| H63A-C63-H63B | 107.9     |
| C63-C64-H64A  | 109.5     |
| C63-C64-H64B  | 109.5     |
| H64A-C64-H64B | 109.5     |
| C63-C64-H64C  | 109.5     |
| H64A-C64-H64C | 109.5     |
| H64B-C64-H64C | 109.5     |
| C11-C65-C12   | 109.1(17) |
| C11-C65-H65A  | 109.9     |
| C12-C65-H65A  | 109.9     |
| C11-C65-H65B  | 109.9     |
| C12-C65-H65B  | 109.9     |
| H65A-C65-H65B | 108.3     |

---

Symmetry transformations used to generate equivalent atoms:

#1: 1-X, 1-Y, 1-Z; #2: -X, -Y, -Z;

**Table S17.** Crystal data and structure refinement for the second crystal of [Fe(3,5-Me-BAFP)(iPrNO)<sub>2</sub>].

|                                             |                                                                                               |
|---------------------------------------------|-----------------------------------------------------------------------------------------------|
| CCDC number                                 |                                                                                               |
| Empirical formula                           | C <sub>118.53</sub> H <sub>118.37</sub> Cl <sub>0.67</sub> FeN <sub>6</sub> O <sub>9.04</sub> |
| Formula weight                              | 1851.13                                                                                       |
| Temperature [K]                             | 150(2)                                                                                        |
| Crystal system                              | triclinic                                                                                     |
| Space group (number)                        | $P\bar{1}$ (2)                                                                                |
| <i>a</i> [Å]                                | 12.6436(4)                                                                                    |
| <i>b</i> [Å]                                | 14.3552(4)                                                                                    |
| <i>c</i> [Å]                                | 16.4422(5)                                                                                    |
| $\alpha$ [°]                                | 113.0869(14)                                                                                  |
| $\beta$ [°]                                 | 111.5479(12)                                                                                  |
| $\gamma$ [°]                                | 91.5369(13)                                                                                   |
| Volume [Å <sup>3</sup> ]                    | 2501.99(13)                                                                                   |
| <i>Z</i>                                    | 1                                                                                             |
| $\rho_{\text{calc}}$ [gcm <sup>-3</sup> ]   | 1.229                                                                                         |
| $\mu$ [mm <sup>-1</sup> ]                   | 1.866                                                                                         |
| <i>F</i> (000)                              | 981.2                                                                                         |
| Crystal size [mm <sup>3</sup> ]             | 0.430×0.170×0.140                                                                             |
| Crystal colour                              | purple                                                                                        |
| Crystal shape                               | rod                                                                                           |
| Radiation                                   | CuK $\alpha$ ( $\lambda$ =1.54178 Å)                                                          |
| 2 $\theta$ range [°]                        | 6.41 to 160.12 (0.78 Å)                                                                       |
| Index ranges                                | -15 ≤ <i>h</i> ≤ 14<br>-18 ≤ <i>k</i> ≤ 17<br>-20 ≤ <i>l</i> ≤ 20                             |
| Reflections collected                       | 25304                                                                                         |
| Independent reflections                     | 9876<br>$R_{\text{int}} = 0.0372$<br>$R_{\text{sigma}} = 0.0428$                              |
| Completeness to<br>$\theta = 67.679^\circ$  | 98.0 %                                                                                        |
| Data / Restraints / Parameters              | 9876/146/689                                                                                  |
| Absorption correction                       | 0.5494/0.7543                                                                                 |
| T <sub>min</sub> /T <sub>max</sub> (method) | (multi-scan)                                                                                  |
| Goodness-of-fit on <i>F</i> <sup>2</sup>    | 1.091                                                                                         |
| Final <i>R</i> indexes                      | $R_1 = 0.0436$                                                                                |
| [ $I \geq 2\sigma(I)$ ]                     | $wR_2 = 0.1194$                                                                               |
| Final <i>R</i> indexes                      | $R_1 = 0.0465$                                                                                |
| [all data]                                  | $wR_2 = 0.1220$                                                                               |
| Largest peak/hole [eÅ <sup>-3</sup> ]       | 0.29/-0.44                                                                                    |

**Refinement Details:**

A second crystal was very similar with slightly different iPrNO/THF ratios and solvate molecules. This structure was solved by isomorphous replacement from the first crystal of the same compound (grown under slightly different conditions). The disorder model was adjusted (two methylene chloride moieties). The iPrNO ligand was again found to be disordered with a THF molecule. Bond distances of THF were restrained to expected target values (1.45(2) Å for C-O and 1.51(2) Å for C-

C bonds) and the molecule was assumed to be 2-fold symmetric (SAME command). Uij components of ADPs for disordered atoms closer to each other than 2.0 Å were restrained to be similar. Subject to these conditions the occupancy ratio refined to 0.917(3) to 0.083(3). A solvate occupied area was refined as major hexanes and minor methylene chloride (two moieties). The hexane molecule is inversion symmetric. Bond distances of methylene chloride were restrained to expected target values (1.77(2) Å for C-Cl bonds and 2.90(2) Å for Cl...Cl). C-C bond distances of the hexane were restrained to 1.51(2) and 1.55(2) Å for CH<sub>2</sub>-CH<sub>2</sub> and CH<sub>2</sub>-CH<sub>3</sub> moieties, respectively. Uij components of ADPs for disordered atoms closer to each other than 2.0 Å were restrained to be similar. Occupancies were not constrained to unity. Subject to these conditions, occupancy ratios refined to 0.667(7), 0.168(4) and 0.062(3), respectively, for hexane and the two CH<sub>2</sub>Cl<sub>2</sub> moieties.

**Table S18.** Atomic coordinates and  $U_{eq}$  [Å<sup>2</sup>] for the second crystal structure of [Fe(3,5-Me-BAFP)(iPrNO)<sub>2</sub>].

| Atom | x           | y           | z           | $U_{eq}$    |
|------|-------------|-------------|-------------|-------------|
| Fe1  | 0.500000    | 0.500000    | 0.500000    | 0.01836(10) |
| O5   | 0.4200(2)   | 0.64059(16) | 0.42644(16) | 0.0301(8)   |
| N3   | 0.44796(13) | 0.55638(10) | 0.40418(10) | 0.0284(3)   |
| H3A  | 0.373346    | 0.562853    | 0.394112    | 0.043       |
| H3B  | 0.490492    | 0.621667    | 0.433529    | 0.043       |
| C55  | 0.44973(17) | 0.50662(14) | 0.30612(12) | 0.0324(4)   |
| H55  | 0.470825    | 0.437597    | 0.296460    | 0.039       |
| C56  | 0.3297(2)   | 0.4895(2)   | 0.23005(17) | 0.0691(8)   |
| H56A | 0.329652    | 0.454834    | 0.165468    | 0.104       |
| H56B | 0.306652    | 0.556180    | 0.238866    | 0.104       |
| H56C | 0.274690    | 0.446179    | 0.236363    | 0.104       |
| C57  | 0.5433(2)   | 0.5721(2)   | 0.3040(2)   | 0.0613(7)   |
| H57A | 0.548260    | 0.538565    | 0.241288    | 0.092       |
| H57B | 0.617933    | 0.580077    | 0.356059    | 0.092       |
| H57C | 0.524329    | 0.640330    | 0.313432    | 0.092       |
| O1   | 0.14065(10) | 0.28088(9)  | 0.50370(9)  | 0.0306(3)   |
| O2   | 0.06054(10) | 0.33581(11) | 0.22328(9)  | 0.0361(3)   |
| O3   | 0.37252(12) | 0.87543(9)  | 0.61094(9)  | 0.0345(3)   |
| O4   | 0.42915(13) | 0.72077(9)  | 0.82327(9)  | 0.0377(3)   |
| N1   | 0.41307(10) | 0.35869(9)  | 0.39831(9)  | 0.0190(2)   |
| N2   | 0.35837(11) | 0.53086(9)  | 0.52542(9)  | 0.0191(2)   |
| C1   | 0.45498(13) | 0.28260(11) | 0.34372(11) | 0.0206(3)   |
| C2   | 0.36390(14) | 0.19262(12) | 0.27703(12) | 0.0260(3)   |
| H2   | 0.370535    | 0.129886    | 0.231315    | 0.031       |
| C3   | 0.26774(14) | 0.21426(11) | 0.29174(12) | 0.0257(3)   |
| H3   | 0.193580    | 0.169811    | 0.258152    | 0.031       |
| C4   | 0.29856(13) | 0.31785(11) | 0.36826(11) | 0.0204(3)   |
| C5   | 0.22228(13) | 0.36647(11) | 0.40568(11) | 0.0206(3)   |
| C6   | 0.25179(13) | 0.46599(11) | 0.47994(11) | 0.0201(3)   |
| C7   | 0.17317(14) | 0.51600(12) | 0.51918(12) | 0.0247(3)   |
| H7   | 0.094855    | 0.487049    | 0.500586    | 0.030       |
| C8   | 0.23146(13) | 0.61176(12) | 0.58736(12) | 0.0244(3)   |
| H8   | 0.202035    | 0.662999    | 0.625845    | 0.029       |
| C9   | 0.34636(13) | 0.62145(11) | 0.59067(11) | 0.0209(3)   |
| C10  | 0.43268(13) | 0.70962(11) | 0.65158(11) | 0.0209(3)   |

|      |              |             |             |           |
|------|--------------|-------------|-------------|-----------|
| C11  | 0.10146(13)  | 0.30614(11) | 0.36267(11) | 0.0224(3) |
| C12  | 0.06406(14)  | 0.25967(12) | 0.41032(12) | 0.0245(3) |
| C13  | -0.04331(15) | 0.19324(12) | 0.36499(13) | 0.0298(4) |
| H13  | -0.066679    | 0.161156    | 0.398073    | 0.036     |
| C14  | -0.11559(15) | 0.17451(13) | 0.27109(13) | 0.0325(4) |
| H14  | -0.187844    | 0.127466    | 0.239012    | 0.039     |
| C15  | -0.08430(15) | 0.22305(14) | 0.22359(13) | 0.0335(4) |
| H15  | -0.135620    | 0.211708    | 0.160033    | 0.040     |
| C16  | 0.02321(14)  | 0.28881(13) | 0.26966(12) | 0.0273(3) |
| C17  | 0.09180(15)  | 0.26079(13) | 0.56043(12) | 0.0299(4) |
| C18  | 0.01110(16)  | 0.31607(14) | 0.58460(13) | 0.0330(4) |
| H18  | -0.009404    | 0.368952    | 0.564200    | 0.040     |
| C19  | -0.03966(16) | 0.29420(14) | 0.63851(14) | 0.0351(4) |
| C20  | -0.00627(17) | 0.21633(15) | 0.66777(14) | 0.0385(4) |
| H20  | -0.039878    | 0.200892    | 0.705201    | 0.046     |
| C21  | 0.07438(17)  | 0.16111(15) | 0.64373(15) | 0.0387(4) |
| C22  | 0.12506(16)  | 0.18468(14) | 0.59000(14) | 0.0344(4) |
| H22  | 0.181793     | 0.148709    | 0.573981    | 0.041     |
| C23  | -0.1316(2)   | 0.35021(18) | 0.66116(18) | 0.0484(5) |
| H23A | -0.122926    | 0.416844    | 0.658447    | 0.073     |
| H23B | -0.123192    | 0.361812    | 0.726267    | 0.073     |
| H23C | -0.208566    | 0.308416    | 0.613509    | 0.073     |
| C24  | 0.1037(2)    | 0.0722(2)   | 0.6698(2)   | 0.0593(6) |
| H24A | 0.169485     | 0.049186    | 0.655073    | 0.089     |
| H24B | 0.036353     | 0.014913    | 0.632112    | 0.089     |
| H24C | 0.124177     | 0.094946    | 0.739164    | 0.089     |
| H24D | 0.050526     | 0.056844    | 0.695827    | 0.089     |
| H24E | 0.183657     | 0.091117    | 0.718787    | 0.089     |
| H24F | 0.095833     | 0.011084    | 0.611736    | 0.089     |
| C25  | -0.02080(15) | 0.37256(14) | 0.16608(13) | 0.0340(4) |
| C26  | -0.09686(17) | 0.42820(15) | 0.19789(15) | 0.0415(4) |
| H26  | -0.097475    | 0.438851    | 0.258489    | 0.050     |
| C27  | -0.17239(19) | 0.46836(16) | 0.14012(18) | 0.0497(5) |
| C28  | -0.1706(2)   | 0.4496(2)   | 0.05115(19) | 0.0565(6) |
| H28  | -0.222320    | 0.476579    | 0.011426    | 0.068     |
| C29  | -0.0955(2)   | 0.3925(2)   | 0.01836(18) | 0.0558(6) |
| C30  | -0.01950(18) | 0.35426(17) | 0.07782(15) | 0.0425(5) |
| H30  | 0.033211     | 0.315573    | 0.057466    | 0.051     |
| C31  | -0.2541(2)   | 0.5305(2)   | 0.1744(2)   | 0.0713(8) |
| H31A | -0.320030    | 0.528836    | 0.118409    | 0.107     |
| H31B | -0.213242    | 0.602146    | 0.218039    | 0.107     |
| H31C | -0.282286    | 0.500952    | 0.208974    | 0.107     |
| C32  | -0.0967(3)   | 0.3712(3)   | -0.0794(2)  | 0.0824(9) |
| H32A | -0.120503    | 0.296726    | -0.121125   | 0.124     |
| H32B | -0.018765    | 0.395747    | -0.071320   | 0.124     |
| H32C | -0.151497    | 0.407360    | -0.109321   | 0.124     |
| C33  | 0.40900(13)  | 0.80252(11) | 0.72074(11) | 0.0219(3) |
| C34  | 0.38966(14)  | 0.88932(12) | 0.70259(12) | 0.0249(3) |
| C35  | 0.38514(14)  | 0.98160(12) | 0.77285(12) | 0.0277(3) |
| H35  | 0.372980     | 1.040165    | 0.759680    | 0.033     |

|      |             |             |             |            |
|------|-------------|-------------|-------------|------------|
| C36  | 0.39860(14) | 0.98670(12) | 0.86182(12) | 0.0291(4)  |
| H36  | 0.397085    | 1.049799    | 0.910320    | 0.035      |
| C37  | 0.41426(15) | 0.90156(13) | 0.88168(12) | 0.0305(4)  |
| H37  | 0.421923    | 0.905338    | 0.942637    | 0.037      |
| C38  | 0.41854(14) | 0.81002(12) | 0.81018(11) | 0.0254(3)  |
| C39  | 0.39289(17) | 0.96076(13) | 0.59452(14) | 0.0335(4)  |
| C40  | 0.30769(18) | 0.96752(15) | 0.51664(15) | 0.0385(4)  |
| H40  | 0.235873    | 0.919450    | 0.480999    | 0.046      |
| C41  | 0.3280(2)   | 1.04573(17) | 0.49059(17) | 0.0474(5)  |
| C42  | 0.4327(2)   | 1.11606(16) | 0.54635(19) | 0.0513(6)  |
| H42  | 0.445989    | 1.170485    | 0.529971    | 0.062      |
| C43  | 0.5178(2)   | 1.11017(15) | 0.62427(18) | 0.0483(5)  |
| C44  | 0.49749(18) | 1.03038(14) | 0.64852(15) | 0.0399(4)  |
| H44  | 0.555206    | 1.024102    | 0.701729    | 0.048      |
| C45  | 0.2392(3)   | 1.0514(2)   | 0.40300(19) | 0.0602(7)  |
| H45A | 0.263808    | 1.024897    | 0.349492    | 0.090      |
| H45B | 0.231535    | 1.123394    | 0.418293    | 0.090      |
| H45C | 0.164262    | 1.009583    | 0.383976    | 0.090      |
| C46  | 0.6318(3)   | 1.18585(18) | 0.6817(2)   | 0.0669(8)  |
| H46A | 0.695446    | 1.148374    | 0.691846    | 0.100      |
| H46B | 0.634424    | 1.233877    | 0.744576    | 0.100      |
| H46C | 0.639733    | 1.224621    | 0.645992    | 0.100      |
| C47  | 0.50308(18) | 0.73168(13) | 0.91469(13) | 0.0352(4)  |
| C48  | 0.4569(2)   | 0.71712(16) | 0.97323(15) | 0.0460(5)  |
| H48  | 0.375132    | 0.704253    | 0.953165    | 0.055      |
| C49  | 0.5302(3)   | 0.72127(18) | 1.06231(16) | 0.0592(7)  |
| C50  | 0.6486(3)   | 0.7402(2)   | 1.08865(17) | 0.0649(8)  |
| H50  | 0.699409    | 0.743108    | 1.149213    | 0.078      |
| C51  | 0.6953(2)   | 0.7551(3)   | 1.02982(18) | 0.0716(9)  |
| C52  | 0.6204(2)   | 0.7515(2)   | 0.94158(16) | 0.0543(6)  |
| H52  | 0.650471    | 0.762667    | 0.900289    | 0.065      |
| C53  | 0.4832(4)   | 0.7073(3)   | 1.1290(2)   | 0.1086(15) |
| H53A | 0.467290    | 0.633633    | 1.113202    | 0.163      |
| H53B | 0.411250    | 0.733772    | 1.121119    | 0.163      |
| H53C | 0.540336    | 0.745207    | 1.196182    | 0.163      |
| C54  | 0.8253(3)   | 0.7767(6)   | 1.0594(3)   | 0.160(3)   |
| H54A | 0.863396    | 0.745360    | 1.102976    | 0.240      |
| H54B | 0.854876    | 0.851582    | 1.092770    | 0.240      |
| H54C | 0.841560    | 0.747308    | 1.001469    | 0.240      |
| C65  | 0.145(2)    | -0.071(3)   | 0.031(2)    | 0.116(5)   |
| H65A | 0.143859    | -0.008216   | 0.018470    | 0.139      |
| H65B | 0.095704    | -0.130167   | -0.031314   | 0.139      |
| C11  | 0.2885(10)  | -0.0910(13) | 0.0697(9)   | 0.100(4)   |
| C12  | 0.0860(11)  | -0.0548(9)  | 0.1136(10)  | 0.122(4)   |
| C66  | 0.116(4)    | -0.034(7)   | 0.049(5)    | 0.114(5)   |
| H66A | 0.091984    | 0.033685    | 0.068130    | 0.137      |
| H66B | 0.052371    | -0.084431   | -0.011661   | 0.137      |
| C13  | 0.244(2)    | -0.0214(17) | 0.0271(14)  | 0.116(6)   |
| C14  | 0.147(2)    | -0.0751(19) | 0.1410(16)  | 0.120(7)   |
| C62  | 0.0397(5)   | -0.0332(4)  | 0.0181(5)   | 0.110(2)   |

|      |           |            |           |          |
|------|-----------|------------|-----------|----------|
| H62A | 0.040495  | -0.024196  | 0.081232  | 0.132    |
| H62B | 0.005780  | -0.106620  | -0.028060 | 0.132    |
| C63  | 0.1625(6) | -0.0109(5) | 0.0308(4) | 0.102(2) |
| H63A | 0.196426  | 0.063066   | 0.074751  | 0.123    |
| H63B | 0.163175  | -0.024108  | -0.032831 | 0.123    |
| C64  | 0.2411(9) | -0.0800(8) | 0.0742(7) | 0.133(4) |
| H64A | 0.215584  | -0.152436  | 0.026191  | 0.200    |
| H64B | 0.233260  | -0.073652  | 0.133184  | 0.200    |
| H64C | 0.322464  | -0.056050  | 0.089817  | 0.200    |

$U_{eq}$  is defined as 1/3 of the trace of the orthogonalized  $U_{ij}$  tensor.

**Table S19.** Anisotropic displacement parameters [ $\text{\AA}^2$ ] for the second crystal of [Fe(3,5-Me-BAFP)(iPrNO)<sub>2</sub>].

The anisotropic displacement factor exponent takes the form:

$$-2\pi^2 [h^2(a^*)^2U_{11} + k^2(b^*)^2U_{22} + \dots + 2hka^*b^*U_{12}].$$

| Atom | $U_{11}$    | $U_{22}$    | $U_{33}$    | $U_{23}$    | $U_{13}$    | $U_{12}$    |
|------|-------------|-------------|-------------|-------------|-------------|-------------|
| Fe1  | 0.01539(17) | 0.01686(15) | 0.02072(17) | 0.00594(12) | 0.00757(13) | 0.00361(12) |
| O5   | 0.0349(14)  | 0.0241(12)  | 0.0350(13)  | 0.0158(10)  | 0.0144(10)  | 0.0128(9)   |
| N3   | 0.0320(8)   | 0.0225(6)   | 0.0345(7)   | 0.0117(6)   | 0.0179(6)   | 0.0107(5)   |
| C55  | 0.0408(10)  | 0.0354(9)   | 0.0294(8)   | 0.0173(7)   | 0.0188(8)   | 0.0188(8)   |
| C56  | 0.0593(16)  | 0.0666(15)  | 0.0402(12)  | 0.0021(11)  | -0.0012(11) | 0.0314(13)  |
| C57  | 0.0707(17)  | 0.0782(17)  | 0.0809(18)  | 0.0547(15)  | 0.0558(15)  | 0.0326(14)  |
| O1   | 0.0225(6)   | 0.0390(6)   | 0.0341(6)   | 0.0203(5)   | 0.0107(5)   | 0.0049(5)   |
| O2   | 0.0238(6)   | 0.0525(8)   | 0.0357(6)   | 0.0254(6)   | 0.0092(5)   | 0.0064(5)   |
| O3   | 0.0521(8)   | 0.0225(5)   | 0.0316(6)   | 0.0134(5)   | 0.0181(6)   | 0.0094(5)   |
| O4   | 0.0582(9)   | 0.0238(6)   | 0.0258(6)   | 0.0105(5)   | 0.0119(6)   | 0.0068(5)   |
| N1   | 0.0166(6)   | 0.0181(6)   | 0.0222(6)   | 0.0084(5)   | 0.0080(5)   | 0.0049(5)   |
| N2   | 0.0174(6)   | 0.0165(5)   | 0.0213(6)   | 0.0074(5)   | 0.0065(5)   | 0.0043(4)   |
| C1   | 0.0197(7)   | 0.0182(6)   | 0.0220(7)   | 0.0070(5)   | 0.0083(6)   | 0.0052(5)   |
| C2   | 0.0240(8)   | 0.0189(7)   | 0.0286(8)   | 0.0045(6)   | 0.0102(6)   | 0.0038(6)   |
| C3   | 0.0214(8)   | 0.0194(7)   | 0.0287(8)   | 0.0043(6)   | 0.0089(6)   | 0.0013(6)   |
| C4   | 0.0187(7)   | 0.0165(6)   | 0.0229(7)   | 0.0075(5)   | 0.0066(6)   | 0.0024(5)   |
| C5   | 0.0173(7)   | 0.0200(7)   | 0.0240(7)   | 0.0096(6)   | 0.0079(6)   | 0.0037(5)   |
| C6   | 0.0174(7)   | 0.0197(7)   | 0.0237(7)   | 0.0102(6)   | 0.0079(6)   | 0.0050(5)   |
| C7   | 0.0181(7)   | 0.0232(7)   | 0.0327(8)   | 0.0102(6)   | 0.0124(6)   | 0.0056(6)   |
| C8   | 0.0202(8)   | 0.0236(7)   | 0.0289(8)   | 0.0080(6)   | 0.0129(6)   | 0.0072(6)   |
| C9   | 0.0203(7)   | 0.0196(7)   | 0.0243(7)   | 0.0102(6)   | 0.0098(6)   | 0.0082(6)   |
| C10  | 0.0216(7)   | 0.0179(6)   | 0.0238(7)   | 0.0091(6)   | 0.0094(6)   | 0.0063(5)   |
| C11  | 0.0177(7)   | 0.0183(6)   | 0.0274(7)   | 0.0063(6)   | 0.0091(6)   | 0.0046(5)   |
| C12  | 0.0207(8)   | 0.0223(7)   | 0.0307(8)   | 0.0111(6)   | 0.0111(6)   | 0.0072(6)   |
| C13  | 0.0258(8)   | 0.0240(7)   | 0.0418(9)   | 0.0137(7)   | 0.0165(7)   | 0.0055(6)   |
| C14  | 0.0203(8)   | 0.0266(8)   | 0.0399(9)   | 0.0063(7)   | 0.0102(7)   | 0.0003(6)   |
| C15  | 0.0219(8)   | 0.0368(9)   | 0.0302(8)   | 0.0079(7)   | 0.0060(7)   | 0.0025(7)   |
| C16  | 0.0216(8)   | 0.0285(8)   | 0.0288(8)   | 0.0099(6)   | 0.0098(6)   | 0.0053(6)   |
| C17  | 0.0264(8)   | 0.0327(8)   | 0.0328(8)   | 0.0165(7)   | 0.0120(7)   | 0.0048(7)   |
| C18  | 0.0316(9)   | 0.0320(8)   | 0.0409(9)   | 0.0205(7)   | 0.0153(8)   | 0.0091(7)   |
| C19  | 0.0310(9)   | 0.0373(9)   | 0.0392(10)  | 0.0170(8)   | 0.0162(8)   | 0.0068(7)   |
| C20  | 0.0392(10)  | 0.0420(10)  | 0.0420(10)  | 0.0229(8)   | 0.0198(9)   | 0.0063(8)   |
| C21  | 0.0384(10)  | 0.0384(10)  | 0.0455(10)  | 0.0253(8)   | 0.0156(9)   | 0.0084(8)   |
| C22  | 0.0316(9)   | 0.0346(9)   | 0.0417(10)  | 0.0202(8)   | 0.0158(8)   | 0.0111(7)   |

|     |            |            |            |            |            |            |
|-----|------------|------------|------------|------------|------------|------------|
| C23 | 0.0457(12) | 0.0497(12) | 0.0642(14) | 0.0271(11) | 0.0342(11) | 0.0166(10) |
| C24 | 0.0698(16) | 0.0565(13) | 0.0809(17) | 0.0498(13) | 0.0389(14) | 0.0256(12) |
| C25 | 0.0256(9)  | 0.0374(9)  | 0.0339(9)  | 0.0161(7)  | 0.0064(7)  | 0.0031(7)  |
| C26 | 0.0345(10) | 0.0402(10) | 0.0425(10) | 0.0146(8)  | 0.0119(8)  | 0.0054(8)  |
| C27 | 0.0349(11) | 0.0384(10) | 0.0679(14) | 0.0236(10) | 0.0122(10) | 0.0065(8)  |
| C28 | 0.0402(12) | 0.0634(14) | 0.0702(15) | 0.0463(13) | 0.0085(11) | 0.0100(10) |
| C29 | 0.0468(13) | 0.0736(16) | 0.0504(13) | 0.0386(12) | 0.0109(10) | 0.0062(11) |
| C30 | 0.0364(10) | 0.0540(12) | 0.0397(10) | 0.0236(9)  | 0.0146(8)  | 0.0091(9)  |
| C31 | 0.0501(15) | 0.0527(14) | 0.098(2)   | 0.0255(14) | 0.0234(15) | 0.0229(12) |
| C32 | 0.074(2)   | 0.127(3)   | 0.0568(16) | 0.0595(18) | 0.0163(14) | 0.0156(18) |
| C33 | 0.0172(7)  | 0.0187(7)  | 0.0252(7)  | 0.0053(6)  | 0.0084(6)  | 0.0041(5)  |
| C34 | 0.0217(7)  | 0.0215(7)  | 0.0283(8)  | 0.0087(6)  | 0.0093(6)  | 0.0048(6)  |
| C35 | 0.0238(8)  | 0.0197(7)  | 0.0352(9)  | 0.0088(6)  | 0.0107(7)  | 0.0066(6)  |
| C36 | 0.0233(8)  | 0.0212(7)  | 0.0318(8)  | 0.0019(6)  | 0.0101(7)  | 0.0053(6)  |
| C37 | 0.0313(9)  | 0.0277(8)  | 0.0246(8)  | 0.0046(6)  | 0.0105(7)  | 0.0051(7)  |
| C38 | 0.0246(8)  | 0.0210(7)  | 0.0265(8)  | 0.0079(6)  | 0.0089(6)  | 0.0050(6)  |
| C39 | 0.0456(11) | 0.0255(8)  | 0.0414(10) | 0.0175(7)  | 0.0265(8)  | 0.0145(7)  |
| C40 | 0.0450(11) | 0.0384(9)  | 0.0432(10) | 0.0220(8)  | 0.0243(9)  | 0.0189(8)  |
| C41 | 0.0668(15) | 0.0453(11) | 0.0570(13) | 0.0328(10) | 0.0405(12) | 0.0327(11) |
| C42 | 0.0764(16) | 0.0362(10) | 0.0749(15) | 0.0338(11) | 0.0543(14) | 0.0274(11) |
| C43 | 0.0617(14) | 0.0319(9)  | 0.0649(14) | 0.0173(9)  | 0.0439(12) | 0.0119(9)  |
| C44 | 0.0443(11) | 0.0309(9)  | 0.0497(11) | 0.0166(8)  | 0.0251(9)  | 0.0128(8)  |
| C45 | 0.0849(19) | 0.0645(15) | 0.0630(14) | 0.0457(13) | 0.0420(14) | 0.0426(14) |
| C46 | 0.0740(18) | 0.0388(11) | 0.092(2)   | 0.0160(12) | 0.0529(16) | 0.0011(11) |
| C47 | 0.0512(12) | 0.0267(8)  | 0.0273(8)  | 0.0112(7)  | 0.0157(8)  | 0.0149(8)  |
| C48 | 0.0610(14) | 0.0387(10) | 0.0353(10) | 0.0150(8)  | 0.0184(9)  | 0.0003(9)  |
| C49 | 0.096(2)   | 0.0427(11) | 0.0372(11) | 0.0219(9)  | 0.0215(12) | 0.0067(12) |
| C50 | 0.089(2)   | 0.0571(14) | 0.0381(11) | 0.0222(10) | 0.0119(13) | 0.0374(14) |
| C51 | 0.0592(16) | 0.097(2)   | 0.0447(13) | 0.0193(13) | 0.0169(12) | 0.0480(15) |
| C52 | 0.0541(14) | 0.0705(15) | 0.0387(11) | 0.0165(10) | 0.0261(10) | 0.0267(12) |
| C53 | 0.154(4)   | 0.111(3)   | 0.0513(16) | 0.0402(18) | 0.030(2)   | -0.032(3)  |
| C54 | 0.061(2)   | 0.309(8)   | 0.081(3)   | 0.055(4)   | 0.027(2)   | 0.085(4)   |
| C65 | 0.101(6)   | 0.082(5)   | 0.092(5)   | -0.004(5)  | 0.010(5)   | -0.001(6)  |
| Cl1 | 0.088(6)   | 0.122(7)   | 0.058(4)   | 0.004(4)   | 0.034(4)   | 0.019(5)   |
| Cl2 | 0.108(7)   | 0.094(6)   | 0.112(7)   | -0.010(5)  | 0.053(6)   | -0.021(5)  |
| C66 | 0.101(6)   | 0.078(6)   | 0.091(6)   | -0.006(6)  | 0.011(6)   | -0.003(6)  |
| Cl3 | 0.114(9)   | 0.096(8)   | 0.077(7)   | -0.012(7)  | 0.030(7)   | -0.011(8)  |
| Cl4 | 0.112(10)  | 0.088(8)   | 0.097(9)   | 0.014(7)   | 0.005(8)   | -0.005(8)  |
| C62 | 0.096(4)   | 0.070(3)   | 0.097(4)   | 0.003(3)   | 0.007(3)   | -0.003(3)  |
| C63 | 0.089(4)   | 0.067(3)   | 0.079(3)   | -0.013(2)  | 0.008(3)   | 0.002(3)   |
| C64 | 0.135(7)   | 0.087(4)   | 0.093(5)   | 0.007(4)   | -0.005(5)  | -0.003(5)  |

**Table S20.** Bond lengths and angles for second crystal of [Fe(3,5-Me-BAFP)(iPrNO)<sub>2</sub>].

| Atom-Atom            | Length [Å] | Fe1-N2  | 2.0061(13) |
|----------------------|------------|---------|------------|
| Fe1-N3               | 1.9589(14) | O5-N3   | 1.221(2)   |
| Fe1-N3 <sup>#1</sup> | 1.9590(14) | N3-C55  | 1.495(2)   |
| Fe1-N1 <sup>#1</sup> | 1.9973(12) | N3-H3A  | 0.9100     |
| Fe1-N1               | 1.9973(12) | N3-H3B  | 0.9100     |
| Fe1-N2 <sup>#1</sup> | 2.0061(13) | C55-C56 | 1.508(3)   |

|                      |            |          |          |
|----------------------|------------|----------|----------|
| C55-C57              | 1.510(3)   | C19-C23  | 1.507(3) |
| C55-H55              | 1.0000     | C20-C21  | 1.385(3) |
| C56-H56A             | 0.9800     | C20-H20  | 0.9500   |
| C56-H56B             | 0.9800     | C21-C22  | 1.394(3) |
| C56-H56C             | 0.9800     | C21-C24  | 1.512(3) |
| C57-H57A             | 0.9800     | C22-H22  | 0.9500   |
| C57-H57B             | 0.9800     | C23-H23A | 0.9800   |
| C57-H57C             | 0.9800     | C23-H23B | 0.9800   |
| O1-C12               | 1.3832(19) | C23-H23C | 0.9800   |
| O1-C17               | 1.400(2)   | C24-H24A | 0.9800   |
| O2-C16               | 1.382(2)   | C24-H24B | 0.9800   |
| O2-C25               | 1.389(2)   | C24-H24C | 0.9800   |
| O3-C34               | 1.371(2)   | C24-H24D | 0.9800   |
| O3-C39               | 1.390(2)   | C24-H24E | 0.9800   |
| O4-C38               | 1.3820(19) | C24-H24F | 0.9800   |
| O4-C47               | 1.390(2)   | C25-C30  | 1.376(3) |
| N1-C4                | 1.3733(19) | C25-C26  | 1.385(3) |
| N1-C1                | 1.3751(19) | C26-C27  | 1.393(3) |
| N2-C6                | 1.3744(19) | C26-H26  | 0.9500   |
| N2-C9                | 1.3789(19) | C27-C28  | 1.389(4) |
| C1-C10 <sup>#1</sup> | 1.393(2)   | C27-C31  | 1.504(4) |
| C1-C2                | 1.442(2)   | C28-C29  | 1.391(4) |
| C2-C3                | 1.346(2)   | C28-H28  | 0.9500   |
| C2-H2                | 0.9500     | C29-C30  | 1.393(3) |
| C3-C4                | 1.445(2)   | C29-C32  | 1.508(4) |
| C3-H3                | 0.9500     | C30-H30  | 0.9500   |
| C4-C5                | 1.390(2)   | C31-H31A | 0.9800   |
| C5-C6                | 1.393(2)   | C31-H31B | 0.9800   |
| C5-C11               | 1.496(2)   | C31-H31C | 0.9800   |
| C6-C7                | 1.437(2)   | C32-H32A | 0.9800   |
| C7-C8                | 1.349(2)   | C32-H32B | 0.9800   |
| C7-H7                | 0.9500     | C32-H32C | 0.9800   |
| C8-C9                | 1.435(2)   | C33-C38  | 1.390(2) |
| C8-H8                | 0.9500     | C33-C34  | 1.399(2) |
| C9-C10               | 1.387(2)   | C34-C35  | 1.395(2) |
| C10-C33              | 1.498(2)   | C35-C36  | 1.381(2) |
| C11-C12              | 1.396(2)   | C35-H35  | 0.9500   |
| C11-C16              | 1.399(2)   | C36-C37  | 1.385(2) |
| C12-C13              | 1.392(2)   | C36-H36  | 0.9500   |
| C13-C14              | 1.384(3)   | C37-C38  | 1.397(2) |
| C13-H13              | 0.9500     | C37-H37  | 0.9500   |
| C14-C15              | 1.375(3)   | C39-C40  | 1.378(3) |
| C14-H14              | 0.9500     | C39-C44  | 1.381(3) |
| C15-C16              | 1.388(2)   | C40-C41  | 1.397(3) |
| C15-H15              | 0.9500     | C40-H40  | 0.9500   |
| C17-C22              | 1.378(2)   | C41-C42  | 1.387(4) |
| C17-C18              | 1.387(3)   | C41-C45  | 1.500(3) |
| C18-C19              | 1.386(3)   | C42-C43  | 1.373(4) |
| C18-H18              | 0.9500     | C42-H42  | 0.9500   |
| C19-C20              | 1.399(3)   | C43-C44  | 1.398(3) |



|                       |                  |               |            |
|-----------------------|------------------|---------------|------------|
| C43–C46               | 1.503(3)         | N3–Fe1–N1     | 89.14(5)   |
| C44–H44               | 0.9500           | N1–Fe1–N1     | 180.00(7)  |
| C45–H45A              | 0.9800           | N3–Fe1–N2     | 91.91(5)   |
| C45–H45B              | 0.9800           | N3–Fe1–N2     | 88.09(5)   |
| C45–H45C              | 0.9800           | N1–Fe1–N2     | 90.31(5)   |
| C46–H46A              | 0.9800           | N1–Fe1–N2     | 89.69(5)   |
| C46–H46B              | 0.9800           | N3–Fe1–N2     | 88.09(5)   |
| C46–H46C              | 0.9800           | N3–Fe1–N2     | 91.91(5)   |
| C47–C52               | 1.369(3)         | N1–Fe1–N2     | 89.69(5)   |
| C47–C48               | 1.370(3)         | N1–Fe1–N2     | 90.31(5)   |
| C48–C49               | 1.393(3)         | N2–Fe1–N2     | 180.0      |
| C48–H48               | 0.9500           | O5–N3–C55     | 116.51(16) |
| C49–C50               | 1.382(4)         | O5–N3–Fe1     | 119.49(14) |
| C49–C53               | 1.496(4)         | C55–N3–Fe1    | 123.78(10) |
| C50–C51               | 1.380(4)         | C55–N3–H3A    | 106.4      |
| C50–H50               | 0.9500           | Fe1–N3–H3A    | 106.4      |
| C51–C52               | 1.391(3)         | C55–N3–H3B    | 106.4      |
| C51–C54               | 1.517(5)         | Fe1–N3–H3B    | 106.4      |
| C52–H52               | 0.9500           | H3A–N3–H3B    | 106.5      |
| C53–H53A              | 0.9800           | N3–C55–C56    | 109.04(17) |
| C53–H53B              | 0.9800           | N3–C55–C57    | 108.53(17) |
| C53–H53C              | 0.9800           | C56–C55–C57   | 114.8(2)   |
| C54–H54A              | 0.9800           | N3–C55–H55    | 108.1      |
| C54–H54B              | 0.9800           | C56–C55–H55   | 108.1      |
| C54–H54C              | 0.9800           | C57–C55–H55   | 108.1      |
| C65–Cl2               | 1.724(19)        | C55–C56–H56A  | 109.5      |
| C65–Cl1               | 1.767(19)        | C55–C56–H56B  | 109.5      |
| C65–H65A              | 0.9900           | H56A–C56–H56B | 109.5      |
| C65–H65B              | 0.9900           | C55–C56–H56C  | 109.5      |
| C66–Cl4               | 1.76(2)          | H56A–C56–H56C | 109.5      |
| C66–Cl3               | 1.79(2)          | H56B–C56–H56C | 109.5      |
| C66–H66A              | 0.9900           | C55–C57–H57A  | 109.5      |
| C66–H66B              | 0.9900           | C55–C57–H57B  | 109.5      |
| C62–C63               | 1.497(9)         | H57A–C57–H57B | 109.5      |
| C62–C62 <sup>#2</sup> | 1.526(13)        | C55–C57–H57C  | 109.5      |
| C62–H62A              | 0.9900           | H57A–C57–H57C | 109.5      |
| C62–H62B              | 0.9900           | H57B–C57–H57C | 109.5      |
| C63–C64               | 1.602(11)        | C12–O1–C17    | 115.63(13) |
| C63–H63A              | 0.9900           | C16–O2–C25    | 117.34(14) |
| C63–H63B              | 0.9900           | C34–O3–C39    | 119.51(13) |
| C64–H64A              | 0.9800           | C38–O4–C47    | 117.05(13) |
| C64–H64B              | 0.9800           | C4–N1–C1      | 105.87(12) |
| C64–H64C              | 0.9800           | C4–N1–Fe1     | 126.84(10) |
|                       |                  | C1–N1–Fe1     | 127.28(10) |
|                       |                  | C6–N2–C9      | 105.39(12) |
|                       |                  | C6–N2–Fe1     | 126.94(10) |
|                       |                  | C9–N2–Fe1     | 127.66(10) |
|                       |                  | N1–C1–C10     | 126.04(13) |
|                       |                  | N1–C1–C2      | 110.03(13) |
|                       |                  | C10–C1–C2     | 123.90(14) |
| <b>Atom–Atom–</b>     | <b>Angle [°]</b> |               |            |
| <b>Atom</b>           |                  |               |            |
| N3–Fe1–N3             | 180.00(12)       |               |            |
| N3–Fe1–N1             | 89.14(5)         |               |            |
| N3–Fe1–N1             | 90.86(5)         |               |            |
| N3–Fe1–N1             | 90.86(5)         |               |            |

|             |            |               |            |
|-------------|------------|---------------|------------|
| C3-C2-C1    | 107.08(13) | C17-C18-H18   | 120.0      |
| C3-C2-H2    | 126.5      | C18-C19-C20   | 118.13(17) |
| C1-C2-H2    | 126.5      | C18-C19-C23   | 120.53(17) |
| C2-C3-C4    | 107.07(14) | C20-C19-C23   | 121.30(18) |
| C2-C3-H3    | 126.5      | C21-C20-C19   | 121.88(18) |
| C4-C3-H3    | 126.5      | C21-C20-H20   | 119.1      |
| N1-C4-C5    | 126.08(13) | C19-C20-H20   | 119.1      |
| N1-C4-C3    | 109.94(13) | C20-C21-C22   | 119.15(17) |
| C5-C4-C3    | 123.97(14) | C20-C21-C24   | 121.40(19) |
| C4-C5-C6    | 124.20(14) | C22-C21-C24   | 119.38(19) |
| C4-C5-C11   | 116.79(13) | C17-C22-C21   | 119.15(17) |
| C6-C5-C11   | 119.01(14) | C17-C22-H22   | 120.4      |
| N2-C6-C5    | 125.58(14) | C21-C22-H22   | 120.4      |
| N2-C6-C7    | 110.20(13) | C19-C23-H23A  | 109.5      |
| C5-C6-C7    | 124.22(14) | C19-C23-H23B  | 109.5      |
| C8-C7-C6    | 107.13(14) | H23A-C23-H23B | 109.5      |
| C8-C7-H7    | 126.4      | C19-C23-H23C  | 109.5      |
| C6-C7-H7    | 126.4      | H23A-C23-H23C | 109.5      |
| C7-C8-C9    | 106.92(14) | H23B-C23-H23C | 109.5      |
| C7-C8-H8    | 126.5      | C21-C24-H24A  | 109.5      |
| C9-C8-H8    | 126.5      | C21-C24-H24B  | 109.5      |
| N2-C9-C10   | 125.26(14) | H24A-C24-H24B | 109.5      |
| N2-C9-C8    | 110.32(13) | C21-C24-H24C  | 109.5      |
| C10-C9-C8   | 124.41(14) | H24A-C24-H24C | 109.5      |
| C9-C10-C1   | 124.04(14) | H24B-C24-H24C | 109.5      |
| C9-C10-C33  | 119.95(14) | C21-C24-H24D  | 109.5      |
| C1-C10-C33  | 115.96(13) | H24A-C24-H24D | 141.1      |
| C12-C11-C16 | 117.12(14) | H24B-C24-H24D | 56.3       |
| C12-C11-C5  | 121.97(14) | H24C-C24-H24D | 56.3       |
| C16-C11-C5  | 120.80(14) | C21-C24-H24E  | 109.5      |
| O1-C12-C13  | 121.98(15) | H24A-C24-H24E | 56.3       |
| O1-C12-C11  | 116.43(14) | H24B-C24-H24E | 141.1      |
| C13-C12-C11 | 121.57(15) | H24C-C24-H24E | 56.3       |
| C14-C13-C12 | 119.16(16) | H24D-C24-H24E | 109.5      |
| C14-C13-H13 | 120.4      | C21-C24-H24F  | 109.5      |
| C12-C13-H13 | 120.4      | H24A-C24-H24F | 56.3       |
| C15-C14-C13 | 120.94(16) | H24B-C24-H24F | 56.3       |
| C15-C14-H14 | 119.5      | H24C-C24-H24F | 141.1      |
| C13-C14-H14 | 119.5      | H24D-C24-H24F | 109.5      |
| C14-C15-C16 | 119.18(16) | H24E-C24-H24F | 109.5      |
| C14-C15-H15 | 120.4      | C30-C25-C26   | 121.60(18) |
| C16-C15-H15 | 120.4      | C30-C25-O2    | 116.84(17) |
| O2-C16-C15  | 121.26(15) | C26-C25-O2    | 121.52(17) |
| O2-C16-C11  | 116.77(14) | C25-C26-C27   | 119.3(2)   |
| C15-C16-C11 | 121.87(16) | C25-C26-H26   | 120.3      |
| C22-C17-C18 | 121.64(17) | C27-C26-H26   | 120.3      |
| C22-C17-O1  | 118.32(16) | C28-C27-C26   | 118.8(2)   |
| C18-C17-O1  | 120.04(15) | C28-C27-C31   | 121.3(2)   |
| C19-C18-C17 | 120.04(16) | C26-C27-C31   | 120.0(2)   |
| C19-C18-H18 | 120.0      | C27-C28-C29   | 122.1(2)   |

|               |            |               |            |
|---------------|------------|---------------|------------|
| C27-C28-H28   | 119.0      | C42-C43-C44   | 118.5(2)   |
| C29-C28-H28   | 119.0      | C42-C43-C46   | 121.4(2)   |
| C28-C29-C30   | 118.3(2)   | C44-C43-C46   | 120.1(2)   |
| C28-C29-C32   | 121.2(2)   | C39-C44-C43   | 119.5(2)   |
| C30-C29-C32   | 120.5(3)   | C39-C44-H44   | 120.3      |
| C25-C30-C29   | 119.9(2)   | C43-C44-H44   | 120.3      |
| C25-C30-H30   | 120.0      | C41-C45-H45A  | 109.5      |
| C29-C30-H30   | 120.0      | C41-C45-H45B  | 109.5      |
| C27-C31-H31A  | 109.5      | H45A-C45-H45B | 109.5      |
| C27-C31-H31B  | 109.5      | C41-C45-H45C  | 109.5      |
| H31A-C31-H31B | 109.5      | H45A-C45-H45C | 109.5      |
| C27-C31-H31C  | 109.5      | H45B-C45-H45C | 109.5      |
| H31A-C31-H31C | 109.5      | C43-C46-H46A  | 109.5      |
| H31B-C31-H31C | 109.5      | C43-C46-H46B  | 109.5      |
| C29-C32-H32A  | 109.5      | H46A-C46-H46B | 109.5      |
| C29-C32-H32B  | 109.5      | C43-C46-H46C  | 109.5      |
| H32A-C32-H32B | 109.5      | H46A-C46-H46C | 109.5      |
| C29-C32-H32C  | 109.5      | H46B-C46-H46C | 109.5      |
| H32A-C32-H32C | 109.5      | C52-C47-C48   | 121.81(19) |
| H32B-C32-H32C | 109.5      | C52-C47-O4    | 118.80(18) |
| C38-C33-C34   | 117.50(14) | C48-C47-O4    | 119.30(19) |
| C38-C33-C10   | 120.93(13) | C47-C48-C49   | 119.7(2)   |
| C34-C33-C10   | 121.17(14) | C47-C48-H48   | 120.1      |
| O3-C34-C35    | 123.37(14) | C49-C48-H48   | 120.1      |
| O3-C34-C33    | 115.12(13) | C50-C49-C48   | 118.2(2)   |
| C35-C34-C33   | 121.49(15) | C50-C49-C53   | 120.4(3)   |
| C36-C35-C34   | 119.10(15) | C48-C49-C53   | 121.3(3)   |
| C36-C35-H35   | 120.5      | C51-C50-C49   | 122.1(2)   |
| C34-C35-H35   | 120.5      | C51-C50-H50   | 118.9      |
| C35-C36-C37   | 121.25(15) | C49-C50-H50   | 118.9      |
| C35-C36-H36   | 119.4      | C50-C51-C52   | 118.6(3)   |
| C37-C36-H36   | 119.4      | C50-C51-C54   | 122.0(3)   |
| C36-C37-C38   | 118.58(16) | C52-C51-C54   | 119.4(3)   |
| C36-C37-H37   | 120.7      | C47-C52-C51   | 119.5(2)   |
| C38-C37-H37   | 120.7      | C47-C52-H52   | 120.3      |
| O4-C38-C33    | 116.13(13) | C51-C52-H52   | 120.3      |
| O4-C38-C37    | 121.83(15) | C49-C53-H53A  | 109.5      |
| C33-C38-C37   | 122.01(15) | C49-C53-H53B  | 109.5      |
| C40-C39-C44   | 121.61(17) | H53A-C53-H53B | 109.5      |
| C40-C39-O3    | 116.72(17) | C49-C53-H53C  | 109.5      |
| C44-C39-O3    | 121.44(17) | H53A-C53-H53C | 109.5      |
| C39-C40-C41   | 119.4(2)   | H53B-C53-H53C | 109.5      |
| C39-C40-H40   | 120.3      | C51-C54-H54A  | 109.5      |
| C41-C40-H40   | 120.3      | C51-C54-H54B  | 109.5      |
| C42-C41-C40   | 118.4(2)   | H54A-C54-H54B | 109.5      |
| C42-C41-C45   | 121.2(2)   | C51-C54-H54C  | 109.5      |
| C40-C41-C45   | 120.4(2)   | H54A-C54-H54C | 109.5      |
| C43-C42-C41   | 122.61(19) | H54B-C54-H54C | 109.5      |
| C43-C42-H42   | 118.7      | Cl2-C65-Cl1   | 113.1(15)  |
| C41-C42-H42   | 118.7      | Cl2-C65-H65A  | 109.0      |

|               |           |
|---------------|-----------|
| C11-C65-H65A  | 109.0     |
| C12-C65-H65B  | 109.0     |
| C11-C65-H65B  | 109.0     |
| H65A-C65-H65B | 107.8     |
| C14-C66-C13   | 109.3(17) |
| C14-C66-H66A  | 109.8     |
| C13-C66-H66A  | 109.8     |
| C14-C66-H66B  | 109.8     |
| C13-C66-H66B  | 109.8     |
| H66A-C66-H66B | 108.3     |
| C63-C62-C62   | 115.8(7)  |
| C63-C62-H62A  | 108.3     |
| C62-C62-H62A  | 108.3     |
| C63-C62-H62B  | 108.3     |
| C62-C62-H62B  | 108.3     |
| H62A-C62-H62B | 107.4     |
| C62-C63-C64   | 112.4(8)  |
| C62-C63-H63A  | 109.1     |
| C64-C63-H63A  | 109.1     |
| C62-C63-H63B  | 109.1     |
| C64-C63-H63B  | 109.1     |
| H63A-C63-H63B | 107.9     |
| C63-C64-H64A  | 109.5     |
| C63-C64-H64B  | 109.5     |
| H64A-C64-H64B | 109.5     |
| C63-C64-H64C  | 109.5     |
| H64A-C64-H64C | 109.5     |
| H64B-C64-H64C | 109.5     |

---

Symmetry transformations used to generate equivalent atoms:

#1: 1-X, 1-Y, 1-Z; #2: -X, -Y, -Z;

**Table S21.** Torsion angles for second crystal of [Fe(3,5-Me-BAFP)(iPrNO)<sub>2</sub>].

| <b>Atom–Atom–Atom–<br/>Atom</b> | <b>Torsion Angle<br/>[°]</b> |
|---------------------------------|------------------------------|
| O5–N3–C55–C56                   | –60.5(2)                     |
| Fe1–N3–C55–C56                  | 124.88(17)                   |
| O5–N3–C55–C57                   | 65.2(2)                      |
| Fe1–N3–C55–C57                  | –109.37(16)                  |
| C4–N1–C1–C10 <sup>#1</sup>      | 178.89(14)                   |
| Fe1–N1–C1–C10 <sup>#1</sup>     | –0.8(2)                      |
| C4–N1–C1–C2                     | 0.83(16)                     |
| Fe1–N1–C1–C2                    | –178.86(10)                  |
| N1–C1–C2–C3                     | –0.30(18)                    |
| C10 <sup>#1</sup> –C1–C2–C3     | –178.41(15)                  |
| C1–C2–C3–C4                     | –0.34(18)                    |
| C1–N1–C4–C5                     | 177.94(14)                   |
| Fe1–N1–C4–C5                    | –2.4(2)                      |
| C1–N1–C4–C3                     | –1.04(16)                    |
| Fe1–N1–C4–C3                    | 178.65(10)                   |
| C2–C3–C4–N1                     | 0.88(18)                     |
| C2–C3–C4–C5                     | –178.13(15)                  |
| N1–C4–C5–C6                     | 0.6(2)                       |
| C3–C4–C5–C6                     | 179.48(15)                   |
| N1–C4–C5–C11                    | –178.94(14)                  |
| C3–C4–C5–C11                    | –0.1(2)                      |
| C9–N2–C6–C5                     | 177.80(14)                   |
| Fe1–N2–C6–C5                    | –1.3(2)                      |
| C9–N2–C6–C7                     | –1.48(16)                    |
| Fe1–N2–C6–C7                    | 179.39(10)                   |
| C4–C5–C6–N2                     | 1.3(2)                       |
| C11–C5–C6–N2                    | –179.11(13)                  |
| C4–C5–C6–C7                     | –179.50(15)                  |
| C11–C5–C6–C7                    | 0.1(2)                       |
| N2–C6–C7–C8                     | 0.95(18)                     |
| C5–C6–C7–C8                     | –178.34(15)                  |
| C6–C7–C8–C9                     | –0.02(18)                    |
| C6–N2–C9–C10                    | –178.90(14)                  |
| Fe1–N2–C9–C10                   | 0.2(2)                       |
| C6–N2–C9–C8                     | 1.47(16)                     |
| Fe1–N2–C9–C8                    | –179.41(10)                  |
| C7–C8–C9–N2                     | –0.92(18)                    |
| C7–C8–C9–C10                    | 179.45(15)                   |
| N2–C9–C10–C1 <sup>#1</sup>      | –1.5(2)                      |
| C8–C9–C10–C1 <sup>#1</sup>      | 178.11(15)                   |
| N2–C9–C10–C33                   | –178.78(14)                  |
| C8–C9–C10–C33                   | 0.8(2)                       |
| C4–C5–C11–C12                   | 103.08(17)                   |
| C6–C5–C11–C12                   | –76.52(19)                   |
| C4–C5–C11–C16                   | –72.97(19)                   |
| C6–C5–C11–C16                   | 107.44(17)                   |

|                               |             |
|-------------------------------|-------------|
| C17-O1-C12-C13                | -20.2(2)    |
| C17-O1-C12-C11                | 161.63(14)  |
| C16-C11-C12-O1                | -177.49(13) |
| C5-C11-C12-O1                 | 6.3(2)      |
| C16-C11-C12-C13               | 4.3(2)      |
| C5-C11-C12-C13                | -171.90(14) |
| O1-C12-C13-C14                | -179.44(15) |
| C11-C12-C13-C14               | -1.3(2)     |
| C12-C13-C14-C15               | -2.1(3)     |
| C13-C14-C15-C16               | 2.3(3)      |
| C25-O2-C16-C15                | 40.2(2)     |
| C25-O2-C16-C11                | -143.30(15) |
| C14-C15-C16-O2                | 177.17(16)  |
| C14-C15-C16-C11               | 0.9(3)      |
| C12-C11-C16-O2                | 179.46(14)  |
| C5-C11-C16-O2                 | -4.3(2)     |
| C12-C11-C16-C15               | -4.1(2)     |
| C5-C11-C16-C15                | 172.16(15)  |
| C12-O1-C17-C22                | 115.22(17)  |
| C12-O1-C17-C18                | -64.0(2)    |
| C22-C17-C18-C19               | -1.0(3)     |
| O1-C17-C18-C19                | 178.21(16)  |
| C17-C18-C19-C20               | 0.5(3)      |
| C17-C18-C19-C23               | -177.07(18) |
| C18-C19-C20-C21               | -0.5(3)     |
| C23-C19-C20-C21               | 177.1(2)    |
| C19-C20-C21-C22               | 0.9(3)      |
| C19-C20-C21-C24               | -175.7(2)   |
| C18-C17-C22-C21               | 1.4(3)      |
| O1-C17-C22-C21                | -177.81(16) |
| C20-C21-C22-C17               | -1.4(3)     |
| C24-C21-C22-C17               | 175.4(2)    |
| C16-O2-C25-C30                | -137.26(17) |
| C16-O2-C25-C26                | 45.0(2)     |
| C30-C25-C26-C27               | -1.3(3)     |
| O2-C25-C26-C27                | 176.41(17)  |
| C25-C26-C27-C28               | 1.2(3)      |
| C25-C26-C27-C31               | -179.0(2)   |
| C26-C27-C28-C29               | -0.3(3)     |
| C31-C27-C28-C29               | 179.9(2)    |
| C27-C28-C29-C30               | -0.6(4)     |
| C27-C28-C29-C32               | 178.8(3)    |
| C26-C25-C30-C29               | 0.3(3)      |
| O2-C25-C30-C29                | -177.44(19) |
| C28-C29-C30-C25               | 0.6(3)      |
| C32-C29-C30-C25               | -178.8(2)   |
| C9-C10-C33-C38                | 83.30(19)   |
| C1 <sup>#1</sup> -C10-C33-C38 | -94.22(18)  |
| C9-C10-C33-C34                | -104.08(18) |
| C1 <sup>#1</sup> -C10-C33-C34 | 78.40(19)   |

|                                |             |
|--------------------------------|-------------|
| C39-O3-C34-C35                 | 24.3(2)     |
| C39-O3-C34-C33                 | -157.54(15) |
| C38-C33-C34-O3                 | -175.46(14) |
| C10-C33-C34-O3                 | 11.7(2)     |
| C38-C33-C34-C35                | 2.8(2)      |
| C10-C33-C34-C35                | -170.09(15) |
| O3-C34-C35-C36                 | 177.22(15)  |
| C33-C34-C35-C36                | -0.9(2)     |
| C34-C35-C36-C37                | -1.2(3)     |
| C35-C36-C37-C38                | 1.2(3)      |
| C47-O4-C38-C33                 | 142.38(16)  |
| C47-O4-C38-C37                 | -39.4(2)    |
| C34-C33-C38-O4                 | 175.45(14)  |
| C10-C33-C38-O4                 | -11.7(2)    |
| C34-C33-C38-C37                | -2.7(2)     |
| C10-C33-C38-C37                | 170.14(15)  |
| C36-C37-C38-O4                 | -177.29(15) |
| C36-C37-C38-C33                | 0.8(3)      |
| C34-O3-C39-C40                 | -131.81(17) |
| C34-O3-C39-C44                 | 53.6(2)     |
| C44-C39-C40-C41                | 0.9(3)      |
| O3-C39-C40-C41                 | -173.66(17) |
| C39-C40-C41-C42                | -1.9(3)     |
| C39-C40-C41-C45                | 176.76(19)  |
| C40-C41-C42-C43                | 1.7(3)      |
| C45-C41-C42-C43                | -177.0(2)   |
| C41-C42-C43-C44                | -0.4(3)     |
| C41-C42-C43-C46                | 178.3(2)    |
| C40-C39-C44-C43                | 0.3(3)      |
| O3-C39-C44-C43                 | 174.66(17)  |
| C42-C43-C44-C39                | -0.6(3)     |
| C46-C43-C44-C39                | -179.3(2)   |
| C38-O4-C47-C52                 | -75.3(2)    |
| C38-O4-C47-C48                 | 108.1(2)    |
| C52-C47-C48-C49                | -0.7(3)     |
| O4-C47-C48-C49                 | 175.85(18)  |
| C47-C48-C49-C50                | 0.0(3)      |
| C47-C48-C49-C53                | 179.1(3)    |
| C48-C49-C50-C51                | 0.1(4)      |
| C53-C49-C50-C51                | -179.0(3)   |
| C49-C50-C51-C52                | 0.5(4)      |
| C49-C50-C51-C54                | 179.5(4)    |
| C48-C47-C52-C51                | 1.3(3)      |
| O4-C47-C52-C51                 | -175.3(2)   |
| C50-C51-C52-C47                | -1.1(4)     |
| C54-C51-C52-C47                | 179.8(4)    |
| C62 <sup>#2</sup> -C62-C63-C64 | 177.0(7)    |

---

Symmetry transformations used to generate equivalent atoms:

#1: 1-X, 1-Y, 1-Z; #2: -X, -Y, -Z;

**Table S22.** Crystal data and structure refinement for [Fe(3,5-Me-BAFP)(iPrNH<sub>2</sub>)(iPrNO)].

|                                             |                                                                                               |
|---------------------------------------------|-----------------------------------------------------------------------------------------------|
| CCDC number                                 |                                                                                               |
| Empirical formula                           | C <sub>118.53</sub> H <sub>118.38</sub> Cl <sub>0.67</sub> FeN <sub>6</sub> O <sub>9.05</sub> |
| Formula weight                              | 1851.32                                                                                       |
| Temperature [K]                             | 150(2)                                                                                        |
| Crystal system                              | triclinic                                                                                     |
| Space group (number)                        | $P\bar{1}$ (2)                                                                                |
| <i>a</i> [Å]                                | 12.6436(4)                                                                                    |
| <i>b</i> [Å]                                | 14.3552(4)                                                                                    |
| <i>c</i> [Å]                                | 16.4422(5)                                                                                    |
| $\alpha$ [°]                                | 113.0869(14)                                                                                  |
| $\beta$ [°]                                 | 111.5479(12)                                                                                  |
| $\gamma$ [°]                                | 91.5369(13)                                                                                   |
| Volume [Å <sup>3</sup> ]                    | 2501.99(13)                                                                                   |
| <i>Z</i>                                    | 1                                                                                             |
| $\rho_{\text{calc}}$ [gcm <sup>-3</sup> ]   | 1.229                                                                                         |
| $\mu$ [mm <sup>-1</sup> ]                   | 1.867                                                                                         |
| <i>F</i> (000)                              | 981                                                                                           |
| Crystal size [mm <sup>3</sup> ]             | 0.430×0.170×0.140                                                                             |
| Crystal colour                              | ?                                                                                             |
| Crystal shape                               | ?                                                                                             |
| Radiation                                   | CuK $\alpha$ ( $\lambda$ =1.54178 Å)                                                          |
| 2 $\theta$ range [°]                        | 6.41 to 160.12 (0.78 Å)                                                                       |
| Index ranges                                | -15 ≤ <i>h</i> ≤ 14<br>-18 ≤ <i>k</i> ≤ 17<br>-20 ≤ <i>l</i> ≤ 20                             |
| Reflections collected                       | 25304                                                                                         |
| Independent reflections                     | 9876<br>$R_{\text{int}} = 0.0372$<br>$R_{\text{sigma}} = 0.0428$                              |
| Completeness to<br>$\theta = 67.679^\circ$  | 98.0 %                                                                                        |
| Data / Restraints / Parameters              | 9876/146/689                                                                                  |
| Absorption correction                       | 0.5494/0.7543                                                                                 |
| T <sub>min</sub> /T <sub>max</sub> (method) | (multi-scan)                                                                                  |
| Goodness-of-fit on <i>F</i> <sup>2</sup>    | 1.091                                                                                         |
| Final <i>R</i> indexes                      | $R_1 = 0.0436$                                                                                |
| [ $I \geq 2\sigma(I)$ ]                     | $wR_2 = 0.1194$                                                                               |
| Final <i>R</i> indexes                      | $R_1 = 0.0465$                                                                                |
| [all data]                                  | $wR_2 = 0.1220$                                                                               |
| Largest peak/hole [eÅ <sup>-3</sup> ]       | 0.29/-0.44                                                                                    |

**Refinement Details:**

A crystal structure was obtained of [Fe(3,5-Me-BAFP)(iPrNO)<sub>2</sub>] reacted with B<sub>2</sub>(pin)<sub>2</sub>. The structure was solved by isomorphous replacement from the [Fe(3,5-Me-BAFP)(iPrNO)<sub>2</sub>] crystal. The disorder model was adjusted (two methylene chloride moieties, no THF molecule, partial oxygen loss). The isopropyl nitrosyl ligand was found to be disordered with an isopropyl amine ligand, i.e. the oxygen atom at the nitrogen was partially replaced by two hydrogen atoms. No disorder was refined for the N atom or the isopropyl group. The occupancy ratio refined to 0.522(6)



to 0.478(6) iPrNO:iPrNH<sub>2</sub>. A solvate occupied area was refined as major hexanes and minor methylene chloride (two moieties). The hexane molecule is inversion symmetric. Bond distances of methylene chloride were restrained to expected target values (1.77(2) Å for C-Cl bonds and 2.90(2) Å for Cl...Cl). C-C bond distances of the hexane were restrained to 1.51(2) and 1.55(2) Å for CH<sub>2</sub>-CH<sub>2</sub> and CH<sub>2</sub>-CH<sub>3</sub> moieties, respectively. U<sub>ij</sub> components of ADPs for disordered atoms closer to each other than 2.0 Å were restrained to be similar. Occupancies were not constrained to unity. Subject to these conditions, occupancy rates refined to 0.699(7), 0.113(3) and 0.054(3), respectively, for hexane and the two CH<sub>2</sub>Cl<sub>2</sub> moieties.

**Table S23.** Atomic coordinates and  $U_{eq}$  [Å<sup>2</sup>] for [Fe(3,5-Me-BAFP)(iPrNH<sub>2</sub>)(iPrNO)].

| Atom | x           | y           | z           | $U_{eq}$    |
|------|-------------|-------------|-------------|-------------|
| Fe1  | 0.500000    | 0.500000    | 0.500000    | 0.01836(10) |
| O5   | 0.4200(2)   | 0.64059(16) | 0.42644(16) | 0.0301(8)   |
| N3   | 0.44796(13) | 0.55638(10) | 0.40418(10) | 0.0284(3)   |
| H3A  | 0.373346    | 0.562853    | 0.394112    | 0.043       |
| H3B  | 0.490492    | 0.621667    | 0.433529    | 0.043       |
| C55  | 0.44973(17) | 0.50662(14) | 0.30612(12) | 0.0324(4)   |
| H55  | 0.470825    | 0.437597    | 0.296460    | 0.039       |
| C56  | 0.3297(2)   | 0.4895(2)   | 0.23005(17) | 0.0691(8)   |
| H56A | 0.329652    | 0.454834    | 0.165468    | 0.104       |
| H56B | 0.306652    | 0.556180    | 0.238866    | 0.104       |
| H56C | 0.274690    | 0.446179    | 0.236363    | 0.104       |
| C57  | 0.5433(2)   | 0.5721(2)   | 0.3040(2)   | 0.0613(7)   |
| H57A | 0.548260    | 0.538565    | 0.241288    | 0.092       |
| H57B | 0.617933    | 0.580077    | 0.356059    | 0.092       |
| H57C | 0.524329    | 0.640330    | 0.313432    | 0.092       |
| O1   | 0.14065(10) | 0.28088(9)  | 0.50370(9)  | 0.0306(3)   |
| O2   | 0.06054(10) | 0.33581(11) | 0.22328(9)  | 0.0361(3)   |
| O3   | 0.37252(12) | 0.87543(9)  | 0.61094(9)  | 0.0345(3)   |
| O4   | 0.42915(13) | 0.72077(9)  | 0.82327(9)  | 0.0377(3)   |
| N1   | 0.41307(10) | 0.35869(9)  | 0.39831(9)  | 0.0190(2)   |
| N2   | 0.35837(11) | 0.53086(9)  | 0.52542(9)  | 0.0191(2)   |
| C1   | 0.45498(13) | 0.28260(11) | 0.34372(11) | 0.0206(3)   |
| C2   | 0.36390(14) | 0.19262(12) | 0.27703(12) | 0.0260(3)   |
| H2   | 0.370535    | 0.129886    | 0.231315    | 0.031       |
| C3   | 0.26774(14) | 0.21426(11) | 0.29174(12) | 0.0257(3)   |
| H3   | 0.193580    | 0.169811    | 0.258152    | 0.031       |
| C4   | 0.29856(13) | 0.31785(11) | 0.36826(11) | 0.0204(3)   |
| C5   | 0.22228(13) | 0.36647(11) | 0.40568(11) | 0.0206(3)   |
| C6   | 0.25179(13) | 0.46599(11) | 0.47994(11) | 0.0201(3)   |
| C7   | 0.17317(14) | 0.51600(12) | 0.51918(12) | 0.0247(3)   |
| H7   | 0.094855    | 0.487049    | 0.500586    | 0.030       |
| C8   | 0.23146(13) | 0.61176(12) | 0.58736(12) | 0.0244(3)   |
| H8   | 0.202035    | 0.662999    | 0.625845    | 0.029       |
| C9   | 0.34636(13) | 0.62145(11) | 0.59067(11) | 0.0209(3)   |
| C10  | 0.43268(13) | 0.70962(11) | 0.65158(11) | 0.0209(3)   |
| C11  | 0.10146(13) | 0.30614(11) | 0.36267(11) | 0.0224(3)   |

|      |              |             |             |           |
|------|--------------|-------------|-------------|-----------|
| C12  | 0.06406(14)  | 0.25967(12) | 0.41032(12) | 0.0245(3) |
| C13  | -0.04331(15) | 0.19324(12) | 0.36499(13) | 0.0298(4) |
| H13  | -0.066679    | 0.161156    | 0.398073    | 0.036     |
| C14  | -0.11559(15) | 0.17451(13) | 0.27109(13) | 0.0325(4) |
| H14  | -0.187844    | 0.127466    | 0.239012    | 0.039     |
| C15  | -0.08430(15) | 0.22305(14) | 0.22359(13) | 0.0335(4) |
| H15  | -0.135620    | 0.211708    | 0.160033    | 0.040     |
| C16  | 0.02321(14)  | 0.28881(13) | 0.26966(12) | 0.0273(3) |
| C17  | 0.09180(15)  | 0.26079(13) | 0.56043(12) | 0.0299(4) |
| C18  | 0.01110(16)  | 0.31607(14) | 0.58460(13) | 0.0330(4) |
| H18  | -0.009404    | 0.368952    | 0.564200    | 0.040     |
| C19  | -0.03966(16) | 0.29420(14) | 0.63851(14) | 0.0351(4) |
| C20  | -0.00627(17) | 0.21633(15) | 0.66777(14) | 0.0385(4) |
| H20  | -0.039878    | 0.200892    | 0.705201    | 0.046     |
| C21  | 0.07438(17)  | 0.16111(15) | 0.64373(15) | 0.0387(4) |
| C22  | 0.12506(16)  | 0.18468(14) | 0.59000(14) | 0.0344(4) |
| H22  | 0.181793     | 0.148709    | 0.573981    | 0.041     |
| C23  | -0.1316(2)   | 0.35021(18) | 0.66116(18) | 0.0484(5) |
| H23A | -0.122926    | 0.416844    | 0.658447    | 0.073     |
| H23B | -0.123192    | 0.361812    | 0.726267    | 0.073     |
| H23C | -0.208566    | 0.308416    | 0.613509    | 0.073     |
| C24  | 0.1037(2)    | 0.0722(2)   | 0.6698(2)   | 0.0593(6) |
| H24A | 0.169485     | 0.049186    | 0.655073    | 0.089     |
| H24B | 0.036353     | 0.014913    | 0.632112    | 0.089     |
| H24C | 0.124177     | 0.094946    | 0.739164    | 0.089     |
| H24D | 0.050526     | 0.056844    | 0.695827    | 0.089     |
| H24E | 0.183657     | 0.091117    | 0.718787    | 0.089     |
| H24F | 0.095833     | 0.011084    | 0.611736    | 0.089     |
| C25  | -0.02080(15) | 0.37256(14) | 0.16608(13) | 0.0340(4) |
| C26  | -0.09686(17) | 0.42820(15) | 0.19789(15) | 0.0415(4) |
| H26  | -0.097475    | 0.438851    | 0.258489    | 0.050     |
| C27  | -0.17239(19) | 0.46836(16) | 0.14012(18) | 0.0497(5) |
| C28  | -0.1706(2)   | 0.4496(2)   | 0.05115(19) | 0.0565(6) |
| H28  | -0.222320    | 0.476579    | 0.011426    | 0.068     |
| C29  | -0.0955(2)   | 0.3925(2)   | 0.01836(18) | 0.0558(6) |
| C30  | -0.01950(18) | 0.35426(17) | 0.07782(15) | 0.0425(5) |
| H30  | 0.033211     | 0.315573    | 0.057466    | 0.051     |
| C31  | -0.2541(2)   | 0.5305(2)   | 0.1744(2)   | 0.0713(8) |
| H31A | -0.320030    | 0.528836    | 0.118409    | 0.107     |
| H31B | -0.213242    | 0.602146    | 0.218039    | 0.107     |
| H31C | -0.282286    | 0.500952    | 0.208974    | 0.107     |
| C32  | -0.0967(3)   | 0.3712(3)   | -0.0794(2)  | 0.0824(9) |
| H32A | -0.120503    | 0.296726    | -0.121125   | 0.124     |
| H32B | -0.018765    | 0.395747    | -0.071320   | 0.124     |
| H32C | -0.151497    | 0.407360    | -0.109321   | 0.124     |
| C33  | 0.40900(13)  | 0.80252(11) | 0.72074(11) | 0.0219(3) |
| C34  | 0.38966(14)  | 0.88932(12) | 0.70259(12) | 0.0249(3) |
| C35  | 0.38514(14)  | 0.98160(12) | 0.77285(12) | 0.0277(3) |
| H35  | 0.372980     | 1.040165    | 0.759680    | 0.033     |
| C36  | 0.39860(14)  | 0.98670(12) | 0.86182(12) | 0.0291(4) |

|      |             |             |             |            |
|------|-------------|-------------|-------------|------------|
| H36  | 0.397085    | 1.049799    | 0.910320    | 0.035      |
| C37  | 0.41426(15) | 0.90156(13) | 0.88168(12) | 0.0305(4)  |
| H37  | 0.421923    | 0.905338    | 0.942637    | 0.037      |
| C38  | 0.41854(14) | 0.81002(12) | 0.81018(11) | 0.0254(3)  |
| C39  | 0.39289(17) | 0.96076(13) | 0.59452(14) | 0.0335(4)  |
| C40  | 0.30769(18) | 0.96752(15) | 0.51664(15) | 0.0385(4)  |
| H40  | 0.235873    | 0.919450    | 0.480999    | 0.046      |
| C41  | 0.3280(2)   | 1.04573(17) | 0.49059(17) | 0.0474(5)  |
| C42  | 0.4327(2)   | 1.11606(16) | 0.54635(19) | 0.0513(6)  |
| H42  | 0.445989    | 1.170485    | 0.529971    | 0.062      |
| C43  | 0.5178(2)   | 1.11017(15) | 0.62427(18) | 0.0483(5)  |
| C44  | 0.49749(18) | 1.03038(14) | 0.64852(15) | 0.0399(4)  |
| H44  | 0.555206    | 1.024102    | 0.701729    | 0.048      |
| C45  | 0.2392(3)   | 1.0514(2)   | 0.40300(19) | 0.0602(7)  |
| H45A | 0.263808    | 1.024897    | 0.349492    | 0.090      |
| H45B | 0.231535    | 1.123394    | 0.418293    | 0.090      |
| H45C | 0.164262    | 1.009583    | 0.383976    | 0.090      |
| C46  | 0.6318(3)   | 1.18585(18) | 0.6817(2)   | 0.0669(8)  |
| H46A | 0.695446    | 1.148374    | 0.691846    | 0.100      |
| H46B | 0.634424    | 1.233877    | 0.744576    | 0.100      |
| H46C | 0.639733    | 1.224621    | 0.645992    | 0.100      |
| C47  | 0.50308(18) | 0.73168(13) | 0.91469(13) | 0.0352(4)  |
| C48  | 0.4569(2)   | 0.71712(16) | 0.97323(15) | 0.0460(5)  |
| H48  | 0.375132    | 0.704253    | 0.953165    | 0.055      |
| C49  | 0.5302(3)   | 0.72127(18) | 1.06231(16) | 0.0592(7)  |
| C50  | 0.6486(3)   | 0.7402(2)   | 1.08865(17) | 0.0649(8)  |
| H50  | 0.699409    | 0.743108    | 1.149213    | 0.078      |
| C51  | 0.6953(2)   | 0.7551(3)   | 1.02982(18) | 0.0716(9)  |
| C52  | 0.6204(2)   | 0.7515(2)   | 0.94158(16) | 0.0543(6)  |
| H52  | 0.650471    | 0.762667    | 0.900289    | 0.065      |
| C53  | 0.4832(4)   | 0.7073(3)   | 1.1290(2)   | 0.1086(15) |
| H53A | 0.467290    | 0.633633    | 1.113202    | 0.163      |
| H53B | 0.411250    | 0.733772    | 1.121119    | 0.163      |
| H53C | 0.540336    | 0.745207    | 1.196182    | 0.163      |
| C54  | 0.8253(3)   | 0.7767(6)   | 1.0594(3)   | 0.160(3)   |
| H54A | 0.863396    | 0.745360    | 1.102976    | 0.240      |
| H54B | 0.854876    | 0.851582    | 1.092770    | 0.240      |
| H54C | 0.841560    | 0.747308    | 1.001469    | 0.240      |
| C65  | 0.145(2)    | -0.071(3)   | 0.031(2)    | 0.116(5)   |
| H65A | 0.143859    | -0.008216   | 0.018470    | 0.139      |
| H65B | 0.095704    | -0.130167   | -0.031314   | 0.139      |
| C11  | 0.2885(10)  | -0.0910(13) | 0.0697(9)   | 0.100(4)   |
| C12  | 0.0860(11)  | -0.0548(9)  | 0.1136(10)  | 0.122(4)   |
| C66  | 0.116(4)    | -0.034(7)   | 0.049(5)    | 0.114(5)   |
| H66A | 0.091984    | 0.033685    | 0.068130    | 0.137      |
| H66B | 0.052371    | -0.084431   | -0.011661   | 0.137      |
| C13  | 0.244(2)    | -0.0214(17) | 0.0271(14)  | 0.116(6)   |
| C14  | 0.147(2)    | -0.0751(19) | 0.1410(16)  | 0.120(7)   |
| C62  | 0.0397(5)   | -0.0332(4)  | 0.0181(5)   | 0.110(2)   |
| H62A | 0.040495    | -0.024196   | 0.081232    | 0.132      |

|      |           |            |           |          |
|------|-----------|------------|-----------|----------|
| H62B | 0.005780  | -0.106620  | -0.028060 | 0.132    |
| C63  | 0.1625(6) | -0.0109(5) | 0.0308(4) | 0.102(2) |
| H63A | 0.196426  | 0.063066   | 0.074751  | 0.123    |
| H63B | 0.163175  | -0.024108  | -0.032831 | 0.123    |
| C64  | 0.2411(9) | -0.0800(8) | 0.0742(7) | 0.133(4) |
| H64A | 0.215584  | -0.152436  | 0.026191  | 0.200    |
| H64B | 0.233260  | -0.073652  | 0.133184  | 0.200    |
| H64C | 0.322464  | -0.056050  | 0.089817  | 0.200    |

$U_{\text{eq}}$  is defined as 1/3 of the trace of the orthogonalized  $U_{ij}$  tensor.

**Table S24.** Anisotropic displacement parameters [ $\text{\AA}^2$ ] for  $[\text{Fe}(3,5\text{-Me-BAFP})(\text{iPrNH}_2)(\text{iPrNO})]$ .

The anisotropic displacement factor exponent takes the form:

$$-\pi^2 [h^2(a^*)^2 U_{11} + k^2(b^*)^2 U_{22} + \dots + 2hka^*b^* U_{12}].$$

| Atom | $U_{11}$    | $U_{22}$    | $U_{33}$    | $U_{23}$    | $U_{13}$    | $U_{12}$    |
|------|-------------|-------------|-------------|-------------|-------------|-------------|
| Fe1  | 0.01539(17) | 0.01686(15) | 0.02072(17) | 0.00594(12) | 0.00757(13) | 0.00361(12) |
| O5   | 0.0349(14)  | 0.0241(12)  | 0.0350(13)  | 0.0158(10)  | 0.0144(10)  | 0.0128(9)   |
| N3   | 0.0320(8)   | 0.0225(6)   | 0.0345(7)   | 0.0117(6)   | 0.0179(6)   | 0.0107(5)   |
| C55  | 0.0408(10)  | 0.0354(9)   | 0.0294(8)   | 0.0173(7)   | 0.0188(8)   | 0.0188(8)   |
| C56  | 0.0593(16)  | 0.0666(15)  | 0.0402(12)  | 0.0021(11)  | -0.0012(11) | 0.0314(13)  |
| C57  | 0.0707(17)  | 0.0782(17)  | 0.0809(18)  | 0.0547(15)  | 0.0558(15)  | 0.0326(14)  |
| O1   | 0.0225(6)   | 0.0390(6)   | 0.0341(6)   | 0.0203(5)   | 0.0107(5)   | 0.0049(5)   |
| O2   | 0.0238(6)   | 0.0525(8)   | 0.0357(6)   | 0.0254(6)   | 0.0092(5)   | 0.0064(5)   |
| O3   | 0.0521(8)   | 0.0225(5)   | 0.0316(6)   | 0.0134(5)   | 0.0181(6)   | 0.0094(5)   |
| O4   | 0.0582(9)   | 0.0238(6)   | 0.0258(6)   | 0.0105(5)   | 0.0119(6)   | 0.0068(5)   |
| N1   | 0.0166(6)   | 0.0181(6)   | 0.0222(6)   | 0.0084(5)   | 0.0080(5)   | 0.0049(5)   |
| N2   | 0.0174(6)   | 0.0165(5)   | 0.0213(6)   | 0.0074(5)   | 0.0065(5)   | 0.0043(4)   |
| C1   | 0.0197(7)   | 0.0182(6)   | 0.0220(7)   | 0.0070(5)   | 0.0083(6)   | 0.0052(5)   |
| C2   | 0.0240(8)   | 0.0189(7)   | 0.0286(8)   | 0.0045(6)   | 0.0102(6)   | 0.0038(6)   |
| C3   | 0.0214(8)   | 0.0194(7)   | 0.0287(8)   | 0.0043(6)   | 0.0089(6)   | 0.0013(6)   |
| C4   | 0.0187(7)   | 0.0165(6)   | 0.0229(7)   | 0.0075(5)   | 0.0066(6)   | 0.0024(5)   |
| C5   | 0.0173(7)   | 0.0200(7)   | 0.0240(7)   | 0.0096(6)   | 0.0079(6)   | 0.0037(5)   |
| C6   | 0.0174(7)   | 0.0197(7)   | 0.0237(7)   | 0.0102(6)   | 0.0079(6)   | 0.0050(5)   |
| C7   | 0.0181(7)   | 0.0232(7)   | 0.0327(8)   | 0.0102(6)   | 0.0124(6)   | 0.0056(6)   |
| C8   | 0.0202(8)   | 0.0236(7)   | 0.0289(8)   | 0.0080(6)   | 0.0129(6)   | 0.0072(6)   |
| C9   | 0.0203(7)   | 0.0196(7)   | 0.0243(7)   | 0.0102(6)   | 0.0098(6)   | 0.0082(6)   |
| C10  | 0.0216(7)   | 0.0179(6)   | 0.0238(7)   | 0.0091(6)   | 0.0094(6)   | 0.0063(5)   |
| C11  | 0.0177(7)   | 0.0183(6)   | 0.0274(7)   | 0.0063(6)   | 0.0091(6)   | 0.0046(5)   |
| C12  | 0.0207(8)   | 0.0223(7)   | 0.0307(8)   | 0.0111(6)   | 0.0111(6)   | 0.0072(6)   |
| C13  | 0.0258(8)   | 0.0240(7)   | 0.0418(9)   | 0.0137(7)   | 0.0165(7)   | 0.0055(6)   |
| C14  | 0.0203(8)   | 0.0266(8)   | 0.0399(9)   | 0.0063(7)   | 0.0102(7)   | 0.0003(6)   |
| C15  | 0.0219(8)   | 0.0368(9)   | 0.0302(8)   | 0.0079(7)   | 0.0060(7)   | 0.0025(7)   |
| C16  | 0.0216(8)   | 0.0285(8)   | 0.0288(8)   | 0.0099(6)   | 0.0098(6)   | 0.0053(6)   |
| C17  | 0.0264(8)   | 0.0327(8)   | 0.0328(8)   | 0.0165(7)   | 0.0120(7)   | 0.0048(7)   |
| C18  | 0.0316(9)   | 0.0320(8)   | 0.0409(9)   | 0.0205(7)   | 0.0153(8)   | 0.0091(7)   |
| C19  | 0.0310(9)   | 0.0373(9)   | 0.0392(10)  | 0.0170(8)   | 0.0162(8)   | 0.0068(7)   |
| C20  | 0.0392(10)  | 0.0420(10)  | 0.0420(10)  | 0.0229(8)   | 0.0198(9)   | 0.0063(8)   |
| C21  | 0.0384(10)  | 0.0384(10)  | 0.0455(10)  | 0.0253(8)   | 0.0156(9)   | 0.0084(8)   |
| C22  | 0.0316(9)   | 0.0346(9)   | 0.0417(10)  | 0.0202(8)   | 0.0158(8)   | 0.0111(7)   |
| C23  | 0.0457(12)  | 0.0497(12)  | 0.0642(14)  | 0.0271(11)  | 0.0342(11)  | 0.0166(10)  |
| C24  | 0.0698(16)  | 0.0565(13)  | 0.0809(17)  | 0.0498(13)  | 0.0389(14)  | 0.0256(12)  |

|     |            |            |            |            |            |            |
|-----|------------|------------|------------|------------|------------|------------|
| C25 | 0.0256(9)  | 0.0374(9)  | 0.0339(9)  | 0.0161(7)  | 0.0064(7)  | 0.0031(7)  |
| C26 | 0.0345(10) | 0.0402(10) | 0.0425(10) | 0.0146(8)  | 0.0119(8)  | 0.0054(8)  |
| C27 | 0.0349(11) | 0.0384(10) | 0.0679(14) | 0.0236(10) | 0.0122(10) | 0.0065(8)  |
| C28 | 0.0402(12) | 0.0634(14) | 0.0702(15) | 0.0463(13) | 0.0085(11) | 0.0100(10) |
| C29 | 0.0468(13) | 0.0736(16) | 0.0504(13) | 0.0386(12) | 0.0109(10) | 0.0062(11) |
| C30 | 0.0364(10) | 0.0540(12) | 0.0397(10) | 0.0236(9)  | 0.0146(8)  | 0.0091(9)  |
| C31 | 0.0501(15) | 0.0527(14) | 0.098(2)   | 0.0255(14) | 0.0234(15) | 0.0229(12) |
| C32 | 0.074(2)   | 0.127(3)   | 0.0568(16) | 0.0595(18) | 0.0163(14) | 0.0156(18) |
| C33 | 0.0172(7)  | 0.0187(7)  | 0.0252(7)  | 0.0053(6)  | 0.0084(6)  | 0.0041(5)  |
| C34 | 0.0217(7)  | 0.0215(7)  | 0.0283(8)  | 0.0087(6)  | 0.0093(6)  | 0.0048(6)  |
| C35 | 0.0238(8)  | 0.0197(7)  | 0.0352(9)  | 0.0088(6)  | 0.0107(7)  | 0.0066(6)  |
| C36 | 0.0233(8)  | 0.0212(7)  | 0.0318(8)  | 0.0019(6)  | 0.0101(7)  | 0.0053(6)  |
| C37 | 0.0313(9)  | 0.0277(8)  | 0.0246(8)  | 0.0046(6)  | 0.0105(7)  | 0.0051(7)  |
| C38 | 0.0246(8)  | 0.0210(7)  | 0.0265(8)  | 0.0079(6)  | 0.0089(6)  | 0.0050(6)  |
| C39 | 0.0456(11) | 0.0255(8)  | 0.0414(10) | 0.0175(7)  | 0.0265(8)  | 0.0145(7)  |
| C40 | 0.0450(11) | 0.0384(9)  | 0.0432(10) | 0.0220(8)  | 0.0243(9)  | 0.0189(8)  |
| C41 | 0.0668(15) | 0.0453(11) | 0.0570(13) | 0.0328(10) | 0.0405(12) | 0.0327(11) |
| C42 | 0.0764(16) | 0.0362(10) | 0.0749(15) | 0.0338(11) | 0.0543(14) | 0.0274(11) |
| C43 | 0.0617(14) | 0.0319(9)  | 0.0649(14) | 0.0173(9)  | 0.0439(12) | 0.0119(9)  |
| C44 | 0.0443(11) | 0.0309(9)  | 0.0497(11) | 0.0166(8)  | 0.0251(9)  | 0.0128(8)  |
| C45 | 0.0849(19) | 0.0645(15) | 0.0630(14) | 0.0457(13) | 0.0420(14) | 0.0426(14) |
| C46 | 0.0740(18) | 0.0388(11) | 0.092(2)   | 0.0160(12) | 0.0529(16) | 0.0011(11) |
| C47 | 0.0512(12) | 0.0267(8)  | 0.0273(8)  | 0.0112(7)  | 0.0157(8)  | 0.0149(8)  |
| C48 | 0.0610(14) | 0.0387(10) | 0.0353(10) | 0.0150(8)  | 0.0184(9)  | 0.0003(9)  |
| C49 | 0.096(2)   | 0.0427(11) | 0.0372(11) | 0.0219(9)  | 0.0215(12) | 0.0067(12) |
| C50 | 0.089(2)   | 0.0571(14) | 0.0381(11) | 0.0222(10) | 0.0119(13) | 0.0374(14) |
| C51 | 0.0592(16) | 0.097(2)   | 0.0447(13) | 0.0193(13) | 0.0169(12) | 0.0480(15) |
| C52 | 0.0541(14) | 0.0705(15) | 0.0387(11) | 0.0165(10) | 0.0261(10) | 0.0267(12) |
| C53 | 0.154(4)   | 0.111(3)   | 0.0513(16) | 0.0402(18) | 0.030(2)   | -0.032(3)  |
| C54 | 0.061(2)   | 0.309(8)   | 0.081(3)   | 0.055(4)   | 0.027(2)   | 0.085(4)   |
| C65 | 0.101(6)   | 0.082(5)   | 0.092(5)   | -0.004(5)  | 0.010(5)   | -0.001(6)  |
| Cl1 | 0.088(6)   | 0.122(7)   | 0.058(4)   | 0.004(4)   | 0.034(4)   | 0.019(5)   |
| Cl2 | 0.108(7)   | 0.094(6)   | 0.112(7)   | -0.010(5)  | 0.053(6)   | -0.021(5)  |
| C66 | 0.101(6)   | 0.078(6)   | 0.091(6)   | -0.006(6)  | 0.011(6)   | -0.003(6)  |
| Cl3 | 0.114(9)   | 0.096(8)   | 0.077(7)   | -0.012(7)  | 0.030(7)   | -0.011(8)  |
| Cl4 | 0.112(10)  | 0.088(8)   | 0.097(9)   | 0.014(7)   | 0.005(8)   | -0.005(8)  |
| C62 | 0.096(4)   | 0.070(3)   | 0.097(4)   | 0.003(3)   | 0.007(3)   | -0.003(3)  |
| C63 | 0.089(4)   | 0.067(3)   | 0.079(3)   | -0.013(2)  | 0.008(3)   | 0.002(3)   |
| C64 | 0.135(7)   | 0.087(4)   | 0.093(5)   | 0.007(4)   | -0.005(5)  | -0.003(5)  |

**Table S25.** Bond lengths and angles for [Fe(3,5-Me-BAFP)(iPrNH<sub>2</sub>)(iPrNO)].

| Atom-Atom            | Length [Å] |          |          |
|----------------------|------------|----------|----------|
| Fe1-N3               | 1.9589(14) | N3-C55   | 1.495(2) |
| Fe1-N3 <sup>#1</sup> | 1.9590(14) | N3-H3A   | 0.9100   |
| Fe1-N1 <sup>#1</sup> | 1.9973(12) | N3-H3B   | 0.9100   |
| Fe1-N1               | 1.9973(12) | C55-C56  | 1.508(3) |
| Fe1-N2 <sup>#1</sup> | 2.0061(13) | C55-C57  | 1.510(3) |
| Fe1-N2               | 2.0061(13) | C55-H55  | 1.0000   |
| O5-N3                | 1.221(2)   | C56-H56A | 0.9800   |
|                      |            | C56-H56B | 0.9800   |

|                      |            |          |          |
|----------------------|------------|----------|----------|
| C56-H56C             | 0.9800     | C21-C24  | 1.512(3) |
| C57-H57A             | 0.9800     | C22-H22  | 0.9500   |
| C57-H57B             | 0.9800     | C23-H23A | 0.9800   |
| C57-H57C             | 0.9800     | C23-H23B | 0.9800   |
| O1-C12               | 1.3832(19) | C23-H23C | 0.9800   |
| O1-C17               | 1.400(2)   | C24-H24A | 0.9800   |
| O2-C16               | 1.382(2)   | C24-H24B | 0.9800   |
| O2-C25               | 1.389(2)   | C24-H24C | 0.9800   |
| O3-C34               | 1.371(2)   | C24-H24D | 0.9800   |
| O3-C39               | 1.390(2)   | C24-H24E | 0.9800   |
| O4-C38               | 1.3820(19) | C24-H24F | 0.9800   |
| O4-C47               | 1.390(2)   | C25-C30  | 1.376(3) |
| N1-C4                | 1.3733(19) | C25-C26  | 1.385(3) |
| N1-C1                | 1.3751(19) | C26-C27  | 1.393(3) |
| N2-C6                | 1.3744(19) | C26-H26  | 0.9500   |
| N2-C9                | 1.3789(19) | C27-C28  | 1.389(4) |
| C1-C10 <sup>#1</sup> | 1.393(2)   | C27-C31  | 1.504(4) |
| C1-C2                | 1.442(2)   | C28-C29  | 1.391(4) |
| C2-C3                | 1.346(2)   | C28-H28  | 0.9500   |
| C2-H2                | 0.9500     | C29-C30  | 1.393(3) |
| C3-C4                | 1.445(2)   | C29-C32  | 1.508(4) |
| C3-H3                | 0.9500     | C30-H30  | 0.9500   |
| C4-C5                | 1.390(2)   | C31-H31A | 0.9800   |
| C5-C6                | 1.393(2)   | C31-H31B | 0.9800   |
| C5-C11               | 1.496(2)   | C31-H31C | 0.9800   |
| C6-C7                | 1.437(2)   | C32-H32A | 0.9800   |
| C7-C8                | 1.349(2)   | C32-H32B | 0.9800   |
| C7-H7                | 0.9500     | C32-H32C | 0.9800   |
| C8-C9                | 1.435(2)   | C33-C38  | 1.390(2) |
| C8-H8                | 0.9500     | C33-C34  | 1.399(2) |
| C9-C10               | 1.387(2)   | C34-C35  | 1.395(2) |
| C10-C33              | 1.498(2)   | C35-C36  | 1.381(2) |
| C11-C12              | 1.396(2)   | C35-H35  | 0.9500   |
| C11-C16              | 1.399(2)   | C36-C37  | 1.385(2) |
| C12-C13              | 1.392(2)   | C36-H36  | 0.9500   |
| C13-C14              | 1.384(3)   | C37-C38  | 1.397(2) |
| C13-H13              | 0.9500     | C37-H37  | 0.9500   |
| C14-C15              | 1.375(3)   | C39-C40  | 1.378(3) |
| C14-H14              | 0.9500     | C39-C44  | 1.381(3) |
| C15-C16              | 1.388(2)   | C40-C41  | 1.397(3) |
| C15-H15              | 0.9500     | C40-H40  | 0.9500   |
| C17-C22              | 1.378(2)   | C41-C42  | 1.387(4) |
| C17-C18              | 1.387(3)   | C41-C45  | 1.500(3) |
| C18-C19              | 1.386(3)   | C42-C43  | 1.373(4) |
| C18-H18              | 0.9500     | C42-H42  | 0.9500   |
| C19-C20              | 1.399(3)   | C43-C44  | 1.398(3) |
| C19-C23              | 1.507(3)   | C43-C46  | 1.503(3) |
| C20-C21              | 1.385(3)   | C44-H44  | 0.9500   |
| C20-H20              | 0.9500     | C45-H45A | 0.9800   |
| C21-C22              | 1.394(3)   | C45-H45B | 0.9800   |

|                            |                  |               |            |
|----------------------------|------------------|---------------|------------|
| C45–H45C                   | 0.9800           | N1–Fe1–N2     | 90.31(5)   |
| C46–H46A                   | 0.9800           | N1–Fe1–N2     | 89.69(5)   |
| C46–H46B                   | 0.9800           | N3–Fe1–N2     | 88.09(5)   |
| C46–H46C                   | 0.9800           | N3–Fe1–N2     | 91.91(5)   |
| C47–C52                    | 1.369(3)         | N1–Fe1–N2     | 89.69(5)   |
| C47–C48                    | 1.370(3)         | N1–Fe1–N2     | 90.31(5)   |
| C48–C49                    | 1.393(3)         | N2–Fe1–N2     | 180.0      |
| C48–H48                    | 0.9500           | O5–N3–C55     | 116.51(16) |
| C49–C50                    | 1.382(4)         | O5–N3–Fe1     | 119.49(14) |
| C49–C53                    | 1.496(4)         | C55–N3–Fe1    | 123.78(10) |
| C50–C51                    | 1.380(4)         | C55–N3–H3A    | 106.4      |
| C50–H50                    | 0.9500           | Fe1–N3–H3A    | 106.4      |
| C51–C52                    | 1.391(3)         | C55–N3–H3B    | 106.4      |
| C51–C54                    | 1.517(5)         | Fe1–N3–H3B    | 106.4      |
| C52–H52                    | 0.9500           | H3A–N3–H3B    | 106.5      |
| C53–H53A                   | 0.9800           | N3–C55–C56    | 109.04(17) |
| C53–H53B                   | 0.9800           | N3–C55–C57    | 108.53(17) |
| C53–H53C                   | 0.9800           | C56–C55–C57   | 114.8(2)   |
| C54–H54A                   | 0.9800           | N3–C55–H55    | 108.1      |
| C54–H54B                   | 0.9800           | C56–C55–H55   | 108.1      |
| C54–H54C                   | 0.9800           | C57–C55–H55   | 108.1      |
| C65–Cl2                    | 1.724(19)        | C55–C56–H56A  | 109.5      |
| C65–Cl1                    | 1.767(19)        | C55–C56–H56B  | 109.5      |
| C65–H65A                   | 0.9900           | H56A–C56–H56B | 109.5      |
| C65–H65B                   | 0.9900           | C55–C56–H56C  | 109.5      |
| C66–Cl4                    | 1.76(2)          | H56A–C56–H56C | 109.5      |
| C66–Cl3                    | 1.79(2)          | H56B–C56–H56C | 109.5      |
| C66–H66A                   | 0.9900           | C55–C57–H57A  | 109.5      |
| C66–H66B                   | 0.9900           | C55–C57–H57B  | 109.5      |
| C62–C63                    | 1.497(9)         | H57A–C57–H57B | 109.5      |
| C62–C62 <sup>#2</sup>      | 1.526(13)        | C55–C57–H57C  | 109.5      |
| C62–H62A                   | 0.9900           | H57A–C57–H57C | 109.5      |
| C62–H62B                   | 0.9900           | H57B–C57–H57C | 109.5      |
| C63–C64                    | 1.602(11)        | C12–O1–C17    | 115.63(13) |
| C63–H63A                   | 0.9900           | C16–O2–C25    | 117.34(14) |
| C63–H63B                   | 0.9900           | C34–O3–C39    | 119.51(13) |
| C64–H64A                   | 0.9800           | C38–O4–C47    | 117.05(13) |
| C64–H64B                   | 0.9800           | C4–N1–C1      | 105.87(12) |
| C64–H64C                   | 0.9800           | C4–N1–Fe1     | 126.84(10) |
|                            |                  | C1–N1–Fe1     | 127.28(10) |
|                            |                  | C6–N2–C9      | 105.39(12) |
|                            |                  | C6–N2–Fe1     | 126.94(10) |
|                            |                  | C9–N2–Fe1     | 127.66(10) |
|                            |                  | N1–C1–C10     | 126.04(13) |
|                            |                  | N1–C1–C2      | 110.03(13) |
|                            |                  | C10–C1–C2     | 123.90(14) |
|                            |                  | C3–C2–C1      | 107.08(13) |
|                            |                  | C3–C2–H2      | 126.5      |
|                            |                  | C1–C2–H2      | 126.5      |
|                            |                  | C2–C3–C4      | 107.07(14) |
| <b>Atom–Atom–<br/>Atom</b> | <b>Angle [°]</b> |               |            |
| N3–Fe1–N3                  | 180.00(12)       |               |            |
| N3–Fe1–N1                  | 89.14(5)         |               |            |
| N3–Fe1–N1                  | 90.86(5)         |               |            |
| N3–Fe1–N1                  | 90.86(5)         |               |            |
| N3–Fe1–N1                  | 89.14(5)         |               |            |
| N1–Fe1–N1                  | 180.00(7)        |               |            |
| N3–Fe1–N2                  | 91.91(5)         |               |            |
| N3–Fe1–N2                  | 88.09(5)         |               |            |

|             |            |               |            |
|-------------|------------|---------------|------------|
| C2-C3-H3    | 126.5      | C21-C20-C19   | 121.88(18) |
| C4-C3-H3    | 126.5      | C21-C20-H20   | 119.1      |
| N1-C4-C5    | 126.08(13) | C19-C20-H20   | 119.1      |
| N1-C4-C3    | 109.94(13) | C20-C21-C22   | 119.15(17) |
| C5-C4-C3    | 123.97(14) | C20-C21-C24   | 121.40(19) |
| C4-C5-C6    | 124.20(14) | C22-C21-C24   | 119.38(19) |
| C4-C5-C11   | 116.79(13) | C17-C22-C21   | 119.15(17) |
| C6-C5-C11   | 119.01(14) | C17-C22-H22   | 120.4      |
| N2-C6-C5    | 125.58(14) | C21-C22-H22   | 120.4      |
| N2-C6-C7    | 110.20(13) | C19-C23-H23A  | 109.5      |
| C5-C6-C7    | 124.22(14) | C19-C23-H23B  | 109.5      |
| C8-C7-C6    | 107.13(14) | H23A-C23-H23B | 109.5      |
| C8-C7-H7    | 126.4      | C19-C23-H23C  | 109.5      |
| C6-C7-H7    | 126.4      | H23A-C23-H23C | 109.5      |
| C7-C8-C9    | 106.92(14) | H23B-C23-H23C | 109.5      |
| C7-C8-H8    | 126.5      | C21-C24-H24A  | 109.5      |
| C9-C8-H8    | 126.5      | C21-C24-H24B  | 109.5      |
| N2-C9-C10   | 125.26(14) | H24A-C24-H24B | 109.5      |
| N2-C9-C8    | 110.32(13) | C21-C24-H24C  | 109.5      |
| C10-C9-C8   | 124.41(14) | H24A-C24-H24C | 109.5      |
| C9-C10-C1   | 124.04(14) | H24B-C24-H24C | 109.5      |
| C9-C10-C33  | 119.95(14) | C21-C24-H24D  | 109.5      |
| C1-C10-C33  | 115.96(13) | H24A-C24-H24D | 141.1      |
| C12-C11-C16 | 117.12(14) | H24B-C24-H24D | 56.3       |
| C12-C11-C5  | 121.97(14) | H24C-C24-H24D | 56.3       |
| C16-C11-C5  | 120.80(14) | C21-C24-H24E  | 109.5      |
| O1-C12-C13  | 121.98(15) | H24A-C24-H24E | 56.3       |
| O1-C12-C11  | 116.43(14) | H24B-C24-H24E | 141.1      |
| C13-C12-C11 | 121.57(15) | H24C-C24-H24E | 56.3       |
| C14-C13-C12 | 119.16(16) | H24D-C24-H24E | 109.5      |
| C14-C13-H13 | 120.4      | C21-C24-H24F  | 109.5      |
| C12-C13-H13 | 120.4      | H24A-C24-H24F | 56.3       |
| C15-C14-C13 | 120.94(16) | H24B-C24-H24F | 56.3       |
| C15-C14-H14 | 119.5      | H24C-C24-H24F | 141.1      |
| C13-C14-H14 | 119.5      | H24D-C24-H24F | 109.5      |
| C14-C15-C16 | 119.18(16) | H24E-C24-H24F | 109.5      |
| C14-C15-H15 | 120.4      | C30-C25-C26   | 121.60(18) |
| C16-C15-H15 | 120.4      | C30-C25-O2    | 116.84(17) |
| O2-C16-C15  | 121.26(15) | C26-C25-O2    | 121.52(17) |
| O2-C16-C11  | 116.77(14) | C25-C26-C27   | 119.3(2)   |
| C15-C16-C11 | 121.87(16) | C25-C26-H26   | 120.3      |
| C22-C17-C18 | 121.64(17) | C27-C26-H26   | 120.3      |
| C22-C17-O1  | 118.32(16) | C28-C27-C26   | 118.8(2)   |
| C18-C17-O1  | 120.04(15) | C28-C27-C31   | 121.3(2)   |
| C19-C18-C17 | 120.04(16) | C26-C27-C31   | 120.0(2)   |
| C19-C18-H18 | 120.0      | C27-C28-C29   | 122.1(2)   |
| C17-C18-H18 | 120.0      | C27-C28-H28   | 119.0      |
| C18-C19-C20 | 118.13(17) | C29-C28-H28   | 119.0      |
| C18-C19-C23 | 120.53(17) | C28-C29-C30   | 118.3(2)   |
| C20-C19-C23 | 121.30(18) | C28-C29-C32   | 121.2(2)   |



|               |            |               |            |
|---------------|------------|---------------|------------|
| C30-C29-C32   | 120.5(3)   | C39-C44-H44   | 120.3      |
| C25-C30-C29   | 119.9(2)   | C43-C44-H44   | 120.3      |
| C25-C30-H30   | 120.0      | C41-C45-H45A  | 109.5      |
| C29-C30-H30   | 120.0      | C41-C45-H45B  | 109.5      |
| C27-C31-H31A  | 109.5      | H45A-C45-H45B | 109.5      |
| C27-C31-H31B  | 109.5      | C41-C45-H45C  | 109.5      |
| H31A-C31-H31B | 109.5      | H45A-C45-H45C | 109.5      |
| C27-C31-H31C  | 109.5      | H45B-C45-H45C | 109.5      |
| H31A-C31-H31C | 109.5      | C43-C46-H46A  | 109.5      |
| H31B-C31-H31C | 109.5      | C43-C46-H46B  | 109.5      |
| C29-C32-H32A  | 109.5      | H46A-C46-H46B | 109.5      |
| C29-C32-H32B  | 109.5      | C43-C46-H46C  | 109.5      |
| H32A-C32-H32B | 109.5      | H46A-C46-H46C | 109.5      |
| C29-C32-H32C  | 109.5      | H46B-C46-H46C | 109.5      |
| H32A-C32-H32C | 109.5      | C52-C47-C48   | 121.81(19) |
| H32B-C32-H32C | 109.5      | C52-C47-O4    | 118.80(18) |
| C38-C33-C34   | 117.50(14) | C48-C47-O4    | 119.30(19) |
| C38-C33-C10   | 120.93(13) | C47-C48-C49   | 119.7(2)   |
| C34-C33-C10   | 121.17(14) | C47-C48-H48   | 120.1      |
| O3-C34-C35    | 123.37(14) | C49-C48-H48   | 120.1      |
| O3-C34-C33    | 115.12(13) | C50-C49-C48   | 118.2(2)   |
| C35-C34-C33   | 121.49(15) | C50-C49-C53   | 120.4(3)   |
| C36-C35-C34   | 119.10(15) | C48-C49-C53   | 121.3(3)   |
| C36-C35-H35   | 120.5      | C51-C50-C49   | 122.1(2)   |
| C34-C35-H35   | 120.5      | C51-C50-H50   | 118.9      |
| C35-C36-C37   | 121.25(15) | C49-C50-H50   | 118.9      |
| C35-C36-H36   | 119.4      | C50-C51-C52   | 118.6(3)   |
| C37-C36-H36   | 119.4      | C50-C51-C54   | 122.0(3)   |
| C36-C37-C38   | 118.58(16) | C52-C51-C54   | 119.4(3)   |
| C36-C37-H37   | 120.7      | C47-C52-C51   | 119.5(2)   |
| C38-C37-H37   | 120.7      | C47-C52-H52   | 120.3      |
| O4-C38-C33    | 116.13(13) | C51-C52-H52   | 120.3      |
| O4-C38-C37    | 121.83(15) | C49-C53-H53A  | 109.5      |
| C33-C38-C37   | 122.01(15) | C49-C53-H53B  | 109.5      |
| C40-C39-C44   | 121.61(17) | H53A-C53-H53B | 109.5      |
| C40-C39-O3    | 116.72(17) | C49-C53-H53C  | 109.5      |
| C44-C39-O3    | 121.44(17) | H53A-C53-H53C | 109.5      |
| C39-C40-C41   | 119.4(2)   | H53B-C53-H53C | 109.5      |
| C39-C40-H40   | 120.3      | C51-C54-H54A  | 109.5      |
| C41-C40-H40   | 120.3      | C51-C54-H54B  | 109.5      |
| C42-C41-C40   | 118.4(2)   | H54A-C54-H54B | 109.5      |
| C42-C41-C45   | 121.2(2)   | C51-C54-H54C  | 109.5      |
| C40-C41-C45   | 120.4(2)   | H54A-C54-H54C | 109.5      |
| C43-C42-C41   | 122.61(19) | H54B-C54-H54C | 109.5      |
| C43-C42-H42   | 118.7      | C12-C65-C11   | 113.1(15)  |
| C41-C42-H42   | 118.7      | C12-C65-H65A  | 109.0      |
| C42-C43-C44   | 118.5(2)   | C11-C65-H65A  | 109.0      |
| C42-C43-C46   | 121.4(2)   | C12-C65-H65B  | 109.0      |
| C44-C43-C46   | 120.1(2)   | C11-C65-H65B  | 109.0      |
| C39-C44-C43   | 119.5(2)   | H65A-C65-H65B | 107.8      |

|               |           |
|---------------|-----------|
| C14-C66-C13   | 109.3(17) |
| C14-C66-H66A  | 109.8     |
| C13-C66-H66A  | 109.8     |
| C14-C66-H66B  | 109.8     |
| C13-C66-H66B  | 109.8     |
| H66A-C66-H66B | 108.3     |
| C63-C62-C62   | 115.8(7)  |
| C63-C62-H62A  | 108.3     |
| C62-C62-H62A  | 108.3     |
| C63-C62-H62B  | 108.3     |
| C62-C62-H62B  | 108.3     |
| H62A-C62-H62B | 107.4     |
| C62-C63-C64   | 112.4(8)  |
| C62-C63-H63A  | 109.1     |
| C64-C63-H63A  | 109.1     |
| C62-C63-H63B  | 109.1     |
| C64-C63-H63B  | 109.1     |
| H63A-C63-H63B | 107.9     |
| C63-C64-H64A  | 109.5     |
| C63-C64-H64B  | 109.5     |
| H64A-C64-H64B | 109.5     |
| C63-C64-H64C  | 109.5     |
| H64A-C64-H64C | 109.5     |
| H64B-C64-H64C | 109.5     |

---

Symmetry transformations used to generate  
equivalent atoms:  
#1: 1-X, 1-Y, 1-Z; #2: -X, -Y, -Z;

**Table S26.** Torsion angles for [Fe(3,5-Me-BAFP)(iPrNH<sub>2</sub>)(iPrNO)].

| <b>Atom–Atom–Atom–<br/>Atom</b> | <b>Torsion Angle<br/>[°]</b> |
|---------------------------------|------------------------------|
| O5–N3–C55–C56                   | –60.5(2)                     |
| Fe1–N3–C55–C56                  | 124.88(17)                   |
| O5–N3–C55–C57                   | 65.2(2)                      |
| Fe1–N3–C55–C57                  | –109.37(16)                  |
| C4–N1–C1–C10 <sup>#1</sup>      | 178.89(14)                   |
| Fe1–N1–C1–C10 <sup>#1</sup>     | –0.8(2)                      |
| C4–N1–C1–C2                     | 0.83(16)                     |
| Fe1–N1–C1–C2                    | –178.86(10)                  |
| N1–C1–C2–C3                     | –0.30(18)                    |
| C10 <sup>#1</sup> –C1–C2–C3     | –178.41(15)                  |
| C1–C2–C3–C4                     | –0.34(18)                    |
| C1–N1–C4–C5                     | 177.94(14)                   |
| Fe1–N1–C4–C5                    | –2.4(2)                      |
| C1–N1–C4–C3                     | –1.04(16)                    |
| Fe1–N1–C4–C3                    | 178.65(10)                   |
| C2–C3–C4–N1                     | 0.88(18)                     |
| C2–C3–C4–C5                     | –178.13(15)                  |
| N1–C4–C5–C6                     | 0.6(2)                       |
| C3–C4–C5–C6                     | 179.48(15)                   |
| N1–C4–C5–C11                    | –178.94(14)                  |
| C3–C4–C5–C11                    | –0.1(2)                      |
| C9–N2–C6–C5                     | 177.80(14)                   |
| Fe1–N2–C6–C5                    | –1.3(2)                      |
| C9–N2–C6–C7                     | –1.48(16)                    |
| Fe1–N2–C6–C7                    | 179.39(10)                   |
| C4–C5–C6–N2                     | 1.3(2)                       |
| C11–C5–C6–N2                    | –179.11(13)                  |
| C4–C5–C6–C7                     | –179.50(15)                  |
| C11–C5–C6–C7                    | 0.1(2)                       |
| N2–C6–C7–C8                     | 0.95(18)                     |
| C5–C6–C7–C8                     | –178.34(15)                  |
| C6–C7–C8–C9                     | –0.02(18)                    |
| C6–N2–C9–C10                    | –178.90(14)                  |
| Fe1–N2–C9–C10                   | 0.2(2)                       |
| C6–N2–C9–C8                     | 1.47(16)                     |
| Fe1–N2–C9–C8                    | –179.41(10)                  |
| C7–C8–C9–N2                     | –0.92(18)                    |
| C7–C8–C9–C10                    | 179.45(15)                   |

|                            |             |
|----------------------------|-------------|
| N2-C9-C10-C1 <sup>#1</sup> | -1.5(2)     |
| C8-C9-C10-C1 <sup>#1</sup> | 178.11(15)  |
| N2-C9-C10-C33              | -178.78(14) |
| C8-C9-C10-C33              | 0.8(2)      |
| C4-C5-C11-C12              | 103.08(17)  |
| C6-C5-C11-C12              | -76.52(19)  |
| C4-C5-C11-C16              | -72.97(19)  |
| C6-C5-C11-C16              | 107.44(17)  |
| C17-O1-C12-C13             | -20.2(2)    |
| C17-O1-C12-C11             | 161.63(14)  |
| C16-C11-C12-O1             | -177.49(13) |
| C5-C11-C12-O1              | 6.3(2)      |
| C16-C11-C12-C13            | 4.3(2)      |
| C5-C11-C12-C13             | -171.90(14) |
| O1-C12-C13-C14             | -179.44(15) |
| C11-C12-C13-C14            | -1.3(2)     |
| C12-C13-C14-C15            | -2.1(3)     |
| C13-C14-C15-C16            | 2.3(3)      |
| C25-O2-C16-C15             | 40.2(2)     |
| C25-O2-C16-C11             | -143.30(15) |
| C14-C15-C16-O2             | 177.17(16)  |
| C14-C15-C16-C11            | 0.9(3)      |
| C12-C11-C16-O2             | 179.46(14)  |
| C5-C11-C16-O2              | -4.3(2)     |
| C12-C11-C16-C15            | -4.1(2)     |
| C5-C11-C16-C15             | 172.16(15)  |
| C12-O1-C17-C22             | 115.22(17)  |
| C12-O1-C17-C18             | -64.0(2)    |
| C22-C17-C18-C19            | -1.0(3)     |
| O1-C17-C18-C19             | 178.21(16)  |
| C17-C18-C19-C20            | 0.5(3)      |
| C17-C18-C19-C23            | -177.07(18) |
| C18-C19-C20-C21            | -0.5(3)     |
| C23-C19-C20-C21            | 177.1(2)    |
| C19-C20-C21-C22            | 0.9(3)      |
| C19-C20-C21-C24            | -175.7(2)   |
| C18-C17-C22-C21            | 1.4(3)      |
| O1-C17-C22-C21             | -177.81(16) |
| C20-C21-C22-C17            | -1.4(3)     |
| C24-C21-C22-C17            | 175.4(2)    |
| C16-O2-C25-C30             | -137.26(17) |
| C16-O2-C25-C26             | 45.0(2)     |

|                               |             |
|-------------------------------|-------------|
| C30-C25-C26-C27               | -1.3(3)     |
| O2-C25-C26-C27                | 176.41(17)  |
| C25-C26-C27-C28               | 1.2(3)      |
| C25-C26-C27-C31               | -179.0(2)   |
| C26-C27-C28-C29               | -0.3(3)     |
| C31-C27-C28-C29               | 179.9(2)    |
| C27-C28-C29-C30               | -0.6(4)     |
| C27-C28-C29-C32               | 178.8(3)    |
| C26-C25-C30-C29               | 0.3(3)      |
| O2-C25-C30-C29                | -177.44(19) |
| C28-C29-C30-C25               | 0.6(3)      |
| C32-C29-C30-C25               | -178.8(2)   |
| C9-C10-C33-C38                | 83.30(19)   |
| C1 <sup>#1</sup> -C10-C33-C38 | -94.22(18)  |
| C9-C10-C33-C34                | -104.08(18) |
| C1 <sup>#1</sup> -C10-C33-C34 | 78.40(19)   |
| C39-O3-C34-C35                | 24.3(2)     |
| C39-O3-C34-C33                | -157.54(15) |
| C38-C33-C34-O3                | -175.46(14) |
| C10-C33-C34-O3                | 11.7(2)     |
| C38-C33-C34-C35               | 2.8(2)      |
| C10-C33-C34-C35               | -170.09(15) |
| O3-C34-C35-C36                | 177.22(15)  |
| C33-C34-C35-C36               | -0.9(2)     |
| C34-C35-C36-C37               | -1.2(3)     |
| C35-C36-C37-C38               | 1.2(3)      |
| C47-O4-C38-C33                | 142.38(16)  |
| C47-O4-C38-C37                | -39.4(2)    |
| C34-C33-C38-O4                | 175.45(14)  |
| C10-C33-C38-O4                | -11.7(2)    |
| C34-C33-C38-C37               | -2.7(2)     |
| C10-C33-C38-C37               | 170.14(15)  |
| C36-C37-C38-O4                | -177.29(15) |
| C36-C37-C38-C33               | 0.8(3)      |
| C34-O3-C39-C40                | -131.81(17) |
| C34-O3-C39-C44                | 53.6(2)     |
| C44-C39-C40-C41               | 0.9(3)      |
| O3-C39-C40-C41                | -173.66(17) |
| C39-C40-C41-C42               | -1.9(3)     |
| C39-C40-C41-C45               | 176.76(19)  |
| C40-C41-C42-C43               | 1.7(3)      |
| C45-C41-C42-C43               | -177.0(2)   |

|                                |            |
|--------------------------------|------------|
| C41–C42–C43–C44                | –0.4(3)    |
| C41–C42–C43–C46                | 178.3(2)   |
| C40–C39–C44–C43                | 0.3(3)     |
| O3–C39–C44–C43                 | 174.66(17) |
| C42–C43–C44–C39                | –0.6(3)    |
| C46–C43–C44–C39                | –179.3(2)  |
| C38–O4–C47–C52                 | –75.3(2)   |
| C38–O4–C47–C48                 | 108.1(2)   |
| C52–C47–C48–C49                | –0.7(3)    |
| O4–C47–C48–C49                 | 175.85(18) |
| C47–C48–C49–C50                | 0.0(3)     |
| C47–C48–C49–C53                | 179.1(3)   |
| C48–C49–C50–C51                | 0.1(4)     |
| C53–C49–C50–C51                | –179.0(3)  |
| C49–C50–C51–C52                | 0.5(4)     |
| C49–C50–C51–C54                | 179.5(4)   |
| C48–C47–C52–C51                | 1.3(3)     |
| O4–C47–C52–C51                 | –175.3(2)  |
| C50–C51–C52–C47                | –1.1(4)    |
| C54–C51–C52–C47                | 179.8(4)   |
| C62 <sup>#2</sup> –C62–C63–C64 | 177.0(7)   |

---

Symmetry transformations used to generate equivalent atoms:

#1: 1-X, 1-Y, 1-Z; #2: -X, -Y, -Z;

**Table S27.** Crystal data and structure refinement for [Fe(3,5-Me-BAFP)(2-MeTHF)(PhNO)].

---

|                                   |                                                                                                                          |
|-----------------------------------|--------------------------------------------------------------------------------------------------------------------------|
| Empirical formula                 | C <sub>119</sub> H <sub>107</sub> FeN <sub>5</sub> O <sub>10</sub>                                                       |
| Formula weight                    | 1822.94                                                                                                                  |
| Temperature                       | 85(2)                                                                                                                    |
| Wavelength                        | 1.54187                                                                                                                  |
| Crystal system, space group       | Monoclinic, P <sub>21</sub> /c                                                                                           |
| Unit cell dimensions              | a = 12.7311(2) Å    alpha = 90 deg.<br>b = 23.0067(4) Å    beta = 93.621(7) deg.<br>c = 15.9989(11) Å    gamma = 90 deg. |
| Volume                            | 4673.8(3) Å <sup>3</sup>                                                                                                 |
| Z, Calculated density             | 2, 1.295 Mg/m <sup>3</sup>                                                                                               |
| Absorption coefficient            | 1.826 mm <sup>-1</sup>                                                                                                   |
| F(000)                            | 1924                                                                                                                     |
| Crystal size                      | 0.12 x 0.12 x 0.10                                                                                                       |
| Theta range for data collection   | 3.371 to 68.235 deg                                                                                                      |
| Reflections collected / unique    | 127495/8513                                                                                                              |
| Completeness to theta = 67.687    | 99.4%                                                                                                                    |
| Absorption correction             | Empirical                                                                                                                |
| Max. and min. transmission        | 0.8106/0.8385                                                                                                            |
| Refinement method                 | Full Matrix Least Squares on F <sup>2</sup>                                                                              |
| Data / restraints / parameters    | 8513 / 114 / 682                                                                                                         |
| Goodness-of-fit on F <sup>2</sup> | 1.079                                                                                                                    |
| Final R indices [I>2sigma(I)]     | R <sub>1</sub> = 0.0429, wR <sub>2</sub> = 0.1113                                                                        |
| R indices (all data)              | R <sub>1</sub> = 0.0442, wR <sub>2</sub> = 0.1124                                                                        |
| Extinction coefficient            | N/A                                                                                                                      |
| Largest diff. peak and hole       | 0.546 and -0.530 Å <sup>3</sup>                                                                                          |

---

**Table S28.** Atomic coordinates and  $U_{\text{eq}}$  [ $\text{\AA}^2$ ] for  $[\text{Fe}(3,5\text{-Me-BAFP})(2\text{-MeTHF})(\text{PhNO})]$ .

| Atom | <i>x</i>     | <i>y</i>     | <i>z</i>    | $U_{\text{eq}}$ |
|------|--------------|--------------|-------------|-----------------|
| Fe   | 0.000000     | 0.000000     | 1.000000    | 0.02144(11)     |
| O1   | -0.23621(10) | 0.02341(5)   | 0.69939(7)  | 0.0276(3)       |
| O2   | -0.21823(9)  | 0.18603(5)   | 0.88201(7)  | 0.0243(3)       |
| O3   | 0.33168(9)   | -0.03508(5)  | 0.77757(8)  | 0.0250(3)       |
| O4   | 0.28315(9)   | 0.14582(5)   | 0.91014(8)  | 0.0278(3)       |
| O5   | -0.1038(3)   | -0.10707(16) | 0.9685(2)   | 0.0301(8)       |
| O6A  | -0.0145(7)   | -0.0773(5)   | 0.9317(7)   | 0.0277(17)      |
| N1   | 0.02398(10)  | 0.03978(6)   | 0.89230(8)  | 0.0174(3)       |
| N2   | -0.15547(10) | 0.01639(6)   | 0.98500(8)  | 0.0177(3)       |
| N3   | -0.0363(7)   | -0.0715(5)   | 0.9453(7)   | 0.0166(13)      |
| C1   | 0.11812(12)  | 0.04883(7)   | 0.85646(10) | 0.0190(3)       |
| C2   | 0.10085(13)  | 0.07912(8)   | 0.77808(10) | 0.0225(3)       |
| H2   | 0.152957     | 0.090109     | 0.741136    | 0.027           |
| C3   | -0.00344(13) | 0.08889(8)   | 0.76716(10) | 0.0217(3)       |
| H3   | -0.038751    | 0.107820     | 0.720656    | 0.026           |
| C4   | -0.05144(12) | 0.06545(7)   | 0.83868(10) | 0.0186(3)       |
| C5   | -0.15826(12) | 0.06987(7)   | 0.85209(10) | 0.0178(3)       |
| C6   | -0.20624(12) | 0.04612(7)   | 0.91961(10) | 0.0183(3)       |
| C7   | -0.31789(12) | 0.04717(7)   | 0.92959(10) | 0.0212(3)       |
| H7   | -0.369823    | 0.065526     | 0.893373    | 0.025           |
| C8   | -0.33493(13) | 0.01719(8)   | 1.00004(10) | 0.0210(3)       |
| H8   | -0.401128    | 0.009920     | 1.022276    | 0.025           |
| C9   | -0.23343(13) | -0.00172(7)  | 1.03513(11) | 0.0182(3)       |
| C10  | -0.22192(12) | 0.10487(7)   | 0.78822(10) | 0.0182(3)       |
| C11  | -0.25339(12) | 0.08215(7)   | 0.70943(11) | 0.0204(3)       |
| C12  | -0.29860(12) | 0.11714(8)   | 0.64617(10) | 0.0213(3)       |
| H12  | -0.318919    | 0.101103     | 0.592837    | 0.026           |
| C13  | -0.31379(13) | 0.17592(8)   | 0.66176(11) | 0.0235(4)       |
| H13  | -0.343083    | 0.200215     | 0.618261    | 0.028           |
| C14  | -0.28684(13) | 0.19944(8)   | 0.73972(11) | 0.0248(4)       |
| H14  | -0.299156    | 0.239385     | 0.750553    | 0.030           |
| C15  | -0.24140(12) | 0.16365(7)   | 0.80195(10) | 0.0199(3)       |
| C16  | -0.25063(15) | 0.00196(7)   | 0.61730(12) | 0.0266(4)       |
| C17  | -0.17781(15) | 0.01520(9)   | 0.55987(12) | 0.0310(4)       |
| H17  | -0.117088    | 0.037390     | 0.576438    | 0.037           |
| C18  | -0.19371(16) | -0.00407(9)  | 0.47764(14) | 0.0323(4)       |
| C19  | -0.28313(15) | -0.03695(8)  | 0.45623(12) | 0.0301(4)       |
| H19  | -0.294986    | -0.050010    | 0.400055    | 0.036           |
| C20  | -0.35548(15) | -0.05130(8)  | 0.51407(12) | 0.0292(4)       |



|      |              |              |             |            |
|------|--------------|--------------|-------------|------------|
| C21  | -0.33863(15) | -0.03100(8)  | 0.59633(11) | 0.0276(4)  |
| H21  | -0.387286    | -0.039856    | 0.637161    | 0.033      |
| C22  | -0.13274(13) | 0.22327(7)   | 0.89416(11) | 0.0244(4)  |
| C23  | -0.05145(14) | 0.22562(8)   | 0.84071(12) | 0.0271(4)  |
| H23  | -0.054486    | 0.202775     | 0.791124    | 0.033      |
| C24  | 0.03446(15)  | 0.26142(8)   | 0.85969(13) | 0.0312(4)  |
| C25  | 0.03598(16)  | 0.29553(10)  | 0.93162(15) | 0.0416(5)  |
| H25  | 0.093661     | 0.320969     | 0.943988    | 0.050      |
| C26  | -0.04501(16) | 0.29316(11)  | 0.98564(16) | 0.0485(6)  |
| C27  | -0.13018(15) | 0.25658(10)  | 0.96631(14) | 0.0389(5)  |
| H27  | -0.186390    | 0.254487     | 1.002543    | 0.047      |
| C28  | -0.11806(18) | 0.01123(12)  | 0.41265(15) | 0.0469(6)  |
| H28A | -0.071292    | 0.042440     | 0.433947    | 0.070      |
| H28B | -0.157435    | 0.024279     | 0.361429    | 0.070      |
| H28C | -0.076110    | -0.023053    | 0.400203    | 0.070      |
| C29  | -0.45141(18) | -0.08706(10) | 0.48940(13) | 0.0411(5)  |
| H29A | -0.469966    | -0.082006    | 0.429418    | 0.062      |
| H29B | -0.510235    | -0.074313    | 0.521581    | 0.062      |
| H29C | -0.436508    | -0.128151    | 0.501117    | 0.062      |
| C30  | 0.12527(16)  | 0.26197(10)  | 0.80381(14) | 0.0403(5)  |
| H30A | 0.159580     | 0.223825     | 0.805543    | 0.060      |
| H30B | 0.176085     | 0.291772     | 0.823317    | 0.060      |
| H30C | 0.099255     | 0.270684     | 0.746174    | 0.060      |
| C31  | -0.0395(2)   | 0.32807(17)  | 1.0659(2)   | 0.0843(12) |
| H31A | -0.016767    | 0.302845     | 1.112979    | 0.126      |
| H31B | -0.109168    | 0.344079     | 1.075072    | 0.126      |
| H31C | 0.010987     | 0.359915     | 1.061570    | 0.126      |
| C32  | 0.21705(12)  | 0.03262(7)   | 0.89068(10) | 0.0189(3)  |
| C33  | 0.30953(12)  | 0.05462(7)   | 0.84612(10) | 0.0191(3)  |
| C34  | 0.36418(13)  | 0.02165(7)   | 0.78962(10) | 0.0204(3)  |
| C35  | 0.44347(13)  | 0.04612(8)   | 0.74497(11) | 0.0237(4)  |
| H35  | 0.479521     | 0.023139     | 0.706582    | 0.028      |
| C36  | 0.46957(13)  | 0.10404(8)   | 0.75670(11) | 0.0250(4)  |
| H36  | 0.523502     | 0.120689     | 0.725954    | 0.030      |
| C37  | 0.41838(14)  | 0.13786(8)   | 0.81237(11) | 0.0258(4)  |
| H37  | 0.436768     | 0.177563     | 0.820575    | 0.031      |
| C38  | 0.33943(13)  | 0.11280(8)   | 0.85623(11) | 0.0225(3)  |
| C39  | 0.40579(13)  | -0.07514(7)  | 0.75213(11) | 0.0231(4)  |
| C40  | 0.37363(14)  | -0.11367(8)  | 0.68927(11) | 0.0253(4)  |
| H40  | 0.304851     | -0.111020    | 0.662822    | 0.030      |
| C41  | 0.44336(15)  | -0.15660(8)  | 0.66500(12) | 0.0298(4)  |
| C42  | 0.54397(15)  | -0.15854(8)  | 0.70373(12) | 0.0315(4)  |

|      |             |              |             |            |
|------|-------------|--------------|-------------|------------|
| H42  | 0.591732    | -0.187376    | 0.686949    | 0.038      |
| C43  | 0.57697(14) | -0.11941(8)  | 0.76654(12) | 0.0292(4)  |
| C44  | 0.50611(13) | -0.07778(8)  | 0.79151(11) | 0.0252(4)  |
| H44  | 0.526217    | -0.051311    | 0.835232    | 0.030      |
| C45  | 0.41019(19) | -0.19906(9)  | 0.59653(14) | 0.0410(5)  |
| H45A | 0.371038    | -0.231133    | 0.620224    | 0.062      |
| H45B | 0.472738    | -0.214402    | 0.571421    | 0.062      |
| H45C | 0.365224    | -0.179233    | 0.553451    | 0.062      |
| C46  | 0.68775(15) | -0.12038(10) | 0.80610(14) | 0.0378(5)  |
| H46A | 0.708655    | -0.160615    | 0.818480    | 0.057      |
| H46B | 0.690726    | -0.097815    | 0.858189    | 0.057      |
| H46C | 0.735813    | -0.103327    | 0.767336    | 0.057      |
| C47  | 0.33981(14) | 0.17745(7)   | 0.97136(11) | 0.0237(4)  |
| C48  | 0.44201(14) | 0.16345(8)   | 0.99984(11) | 0.0255(4)  |
| H48  | 0.477256    | 0.131712     | 0.975906    | 0.031      |
| C49  | 0.49243(14) | 0.19609(8)   | 1.06351(11) | 0.0250(4)  |
| C50  | 0.43820(15) | 0.24183(8)   | 1.09875(12) | 0.0280(4)  |
| H50  | 0.472224    | 0.264145     | 1.142520    | 0.034      |
| C51  | 0.33494(14) | 0.25542(8)   | 1.07089(12) | 0.0282(4)  |
| C52  | 0.28601(14) | 0.22302(8)   | 1.00610(11) | 0.0259(4)  |
| H52  | 0.216185    | 0.232052     | 0.985767    | 0.031      |
| C53  | 0.60440(15) | 0.18163(8)   | 1.09184(12) | 0.0294(4)  |
| H53A | 0.617715    | 0.140387     | 1.081399    | 0.044      |
| H53B | 0.615931    | 0.189689     | 1.151901    | 0.044      |
| H53C | 0.652454    | 0.205395     | 1.060652    | 0.044      |
| C54  | 0.27527(17) | 0.30362(9)   | 1.11057(14) | 0.0401(5)  |
| H54A | 0.212765    | 0.287566     | 1.134914    | 0.060      |
| H54B | 0.253670    | 0.332544     | 1.067884    | 0.060      |
| H54C | 0.320577    | 0.322115     | 1.154712    | 0.060      |
| C55  | 0.0171(7)   | -0.0903(5)   | 0.8730(7)   | 0.0191(15) |
| C56  | 0.1105(3)   | -0.12214(17) | 0.8795(2)   | 0.0291(8)  |
| H56  | 0.146797    | -0.129510    | 0.932149    | 0.035      |
| C57  | 0.1475(3)   | -0.14231(18) | 0.8059(3)   | 0.0368(9)  |
| H57  | 0.210459    | -0.164574    | 0.808271    | 0.044      |
| C58  | 0.0967(3)   | -0.13144(18) | 0.7293(3)   | 0.0344(9)  |
| H58  | 0.124775    | -0.146171    | 0.679916    | 0.041      |
| C59  | 0.0046(3)   | -0.09908(18) | 0.7236(3)   | 0.0311(8)  |
| H59  | -0.029339   | -0.090826    | 0.670291    | 0.037      |
| C60  | -0.0381(7)  | -0.0786(6)   | 0.7966(7)   | 0.0314(17) |
| H60  | -0.102340   | -0.057517    | 0.794267    | 0.038      |
| C61A | 0.0462(8)   | -0.0947(6)   | 0.8618(8)   | 0.030(2)   |
| H61A | 0.116631    | -0.075321    | 0.866506    | 0.036      |

|      |            |              |           |            |
|------|------------|--------------|-----------|------------|
| C62A | 0.0591(3)  | -0.15941(19) | 0.8765(3) | 0.0398(9)  |
| H62A | 0.117318   | -0.167784    | 0.918772  | 0.048      |
| H62B | 0.071801   | -0.180249    | 0.823874  | 0.048      |
| C63A | -0.0493(3) | -0.17548(18) | 0.9091(3) | 0.0402(10) |
| H63A | -0.105054  | -0.176681    | 0.863121  | 0.048      |
| H63B | -0.046752  | -0.213280    | 0.938797  | 0.048      |
| C64A | -0.0655(4) | -0.1260(2)   | 0.9681(4) | 0.0331(12) |
| H64A | -0.141390  | -0.118171    | 0.972467  | 0.040      |
| H64B | -0.033140  | -0.134645    | 1.024654  | 0.040      |
| C65A | -0.0091(8) | -0.0801(6)   | 0.7792(7) | 0.038(2)   |
| H65A | 0.038960   | -0.086104    | 0.734441  | 0.057      |
| H65B | -0.031766  | -0.039440    | 0.779369  | 0.057      |
| H65C | -0.070706  | -0.105369    | 0.769609  | 0.057      |

**Table S29.** Anisotropic displacement parameters [ $\text{\AA}^2$ ] for [Fe(3,5-Me-BAFP)(2-MeTHF)(PhNO)].

The anisotropic displacement factor exponent takes the form:

$$-2\pi^2 [ h^2(a^*)^2U_{11} + k^2(b^*)^2U_{22} + \dots + 2hka^*b^*U_{12} ].$$

| Atom | $U_{11}$    | $U_{22}$   | $U_{33}$   | $U_{23}$    | $U_{13}$     | $U_{12}$    |
|------|-------------|------------|------------|-------------|--------------|-------------|
| Fe1  | 0.01722(19) | 0.0350(2)  | 0.0120(2)  | 0.00087(15) | -0.00037(14) | 0.00934(15) |
| O1   | 0.0377(7)   | 0.0259(6)  | 0.0179(6)  | -0.0033(5)  | -0.0082(5)   | 0.0066(5)   |
| O2   | 0.0272(6)   | 0.0265(6)  | 0.0193(6)  | -0.0015(5)  | 0.0018(5)    | -0.0021(5)  |
| O3   | 0.0196(6)   | 0.0273(6)  | 0.0290(7)  | -0.0050(5)  | 0.0077(5)    | 0.0008(5)   |
| O4   | 0.0211(6)   | 0.0320(7)  | 0.0303(7)  | -0.0121(5)  | 0.0013(5)    | 0.0000(5)   |
| O5   | 0.0254(19)  | 0.036(2)   | 0.0294(16) | 0.0004(15)  | 0.0055(15)   | -0.0105(14) |
| O6A  | 0.016(3)    | 0.031(3)   | 0.037(4)   | 0.003(2)    | 0.009(2)     | 0.005(2)    |
| N1   | 0.0141(6)   | 0.0231(7)  | 0.0146(7)  | -0.0029(5)  | -0.0017(5)   | 0.0029(5)   |
| N2   | 0.0169(7)   | 0.0226(6)  | 0.0135(7)  | -0.0002(5)  | -0.0010(5)   | 0.0008(5)   |
| N3   | 0.005(3)    | 0.021(2)   | 0.024(3)   | 0.001(2)    | 0.001(2)     | 0.002(2)    |
| C1   | 0.0178(8)   | 0.0267(8)  | 0.0124(8)  | -0.0022(6)  | 0.0003(6)    | 0.0028(6)   |
| C2   | 0.0207(8)   | 0.0325(9)  | 0.0145(8)  | 0.0007(7)   | 0.0032(6)    | 0.0025(7)   |
| C3   | 0.0214(8)   | 0.0298(9)  | 0.0137(8)  | 0.0013(6)   | -0.0007(6)   | 0.0053(7)   |
| C4   | 0.0180(8)   | 0.0239(8)  | 0.0133(8)  | -0.0017(6)  | -0.0030(6)   | 0.0032(6)   |
| C5   | 0.0168(7)   | 0.0220(8)  | 0.0142(8)  | -0.0014(6)  | -0.0023(6)   | 0.0009(6)   |
| C6   | 0.0165(7)   | 0.0217(8)  | 0.0161(8)  | -0.0021(6)  | -0.0032(6)   | 0.0019(6)   |
| C7   | 0.0161(8)   | 0.0285(8)  | 0.0187(8)  | 0.0007(7)   | -0.0021(6)   | 0.0032(6)   |
| C8   | 0.0150(8)   | 0.0289(8)  | 0.0188(8)  | -0.0001(7)  | -0.0004(6)   | 0.0030(7)   |
| C9   | 0.0155(8)   | 0.0228(8)  | 0.0163(8)  | -0.0024(6)  | 0.0006(6)    | 0.0018(6)   |
| C10  | 0.0133(7)   | 0.0245(8)  | 0.0165(8)  | 0.0013(6)   | -0.0003(6)   | 0.0010(6)   |
| C11  | 0.0163(7)   | 0.0245(8)  | 0.0203(8)  | 0.0007(6)   | -0.0002(6)   | 0.0019(6)   |
| C12  | 0.0154(7)   | 0.0319(9)  | 0.0163(8)  | 0.0013(7)   | -0.0014(6)   | 0.0009(6)   |
| C13  | 0.0184(8)   | 0.0298(9)  | 0.0221(9)  | 0.0081(7)   | -0.0001(7)   | 0.0015(7)   |
| C14  | 0.0251(8)   | 0.0246(8)  | 0.0246(9)  | 0.0038(7)   | 0.0014(7)    | 0.0031(7)   |
| C15  | 0.0176(7)   | 0.0250(8)  | 0.0171(8)  | -0.0001(6)  | 0.0012(6)    | -0.0006(6)  |
| C16  | 0.0298(10)  | 0.0298(9)  | 0.0191(9)  | -0.0046(7)  | -0.0064(8)   | 0.0068(7)   |
| C17  | 0.0230(9)   | 0.0394(10) | 0.0300(10) | -0.0083(8)  | -0.0045(8)   | 0.0006(8)   |
| C18  | 0.0255(10)  | 0.0408(11) | 0.0305(11) | -0.0075(8)  | 0.0019(8)    | 0.0028(7)   |
| C19  | 0.0335(10)  | 0.0365(10) | 0.0200(9)  | -0.0067(7)  | -0.0008(7)   | -0.0013(8)  |
| C20  | 0.0329(10)  | 0.0315(9)  | 0.0227(9)  | -0.0016(7)  | -0.0021(7)   | -0.0031(8)  |
| C21  | 0.0317(9)   | 0.0302(9)  | 0.0207(9)  | 0.0011(7)   | 0.0001(7)    | 0.0015(7)   |
| C22  | 0.0231(8)   | 0.0237(8)  | 0.0261(9)  | -0.0012(7)  | -0.0022(7)   | 0.0020(7)   |
| C23  | 0.0292(9)   | 0.0279(9)  | 0.0241(9)  | 0.0002(7)   | 0.0008(7)    | 0.0013(7)   |
| C24  | 0.0265(9)   | 0.0315(9)  | 0.0354(11) | 0.0018(8)   | 0.0007(8)    | 0.0019(7)   |
| C25  | 0.0249(10)  | 0.0424(11) | 0.0572(14) | -0.0183(10) | 0.0001(9)    | -0.0018(8)  |
| C26  | 0.0268(10)  | 0.0601(14) | 0.0585(15) | -0.0358(12) | 0.0024(10)   | -0.0003(10) |
| C27  | 0.0235(9)   | 0.0534(13) | 0.0402(12) | -0.0200(10) | 0.0053(8)    | 0.0014(9)   |

|      |            |            |            |             |             |             |
|------|------------|------------|------------|-------------|-------------|-------------|
| C28  | 0.0325(11) | 0.0699(15) | 0.0392(13) | -0.0154(11) | 0.0101(10)  | -0.0094(11) |
| C29  | 0.0474(12) | 0.0498(12) | 0.0260(11) | -0.0052(9)  | 0.0014(9)   | -0.0192(10) |
| C30  | 0.0336(10) | 0.0477(12) | 0.0400(12) | 0.0046(10)  | 0.0045(9)   | -0.0058(9)  |
| C31  | 0.0353(13) | 0.122(3)   | 0.097(2)   | -0.083(2)   | 0.0146(14)  | -0.0130(15) |
| C32  | 0.0157(7)  | 0.0254(8)  | 0.0155(8)  | -0.0030(6)  | 0.0013(6)   | 0.0023(6)   |
| C33  | 0.0149(7)  | 0.0268(8)  | 0.0153(8)  | 0.0012(6)   | -0.0009(6)  | 0.0023(6)   |
| C34  | 0.0165(8)  | 0.0264(8)  | 0.0181(8)  | -0.0012(7)  | -0.0007(6)  | 0.0013(6)   |
| C35  | 0.0200(8)  | 0.0331(9)  | 0.0185(9)  | 0.0012(7)   | 0.0039(6)   | 0.0037(7)   |
| C36  | 0.0189(8)  | 0.0338(9)  | 0.0223(9)  | 0.0061(7)   | 0.0007(7)   | -0.0011(7)  |
| C37  | 0.0242(8)  | 0.0278(9)  | 0.0252(9)  | 0.0015(7)   | -0.0005(7)  | -0.0015(7)  |
| C38  | 0.0178(8)  | 0.0297(9)  | 0.0198(9)  | -0.0017(7)  | -0.0015(6)  | 0.0025(6)   |
| C39  | 0.0224(8)  | 0.0267(8)  | 0.0212(9)  | 0.0012(7)   | 0.0088(7)   | 0.0012(7)   |
| C40  | 0.0257(9)  | 0.0291(9)  | 0.0215(9)  | 0.0005(7)   | 0.0061(7)   | -0.0026(7)  |
| C41  | 0.0381(10) | 0.0266(9)  | 0.0259(10) | -0.0012(7)  | 0.0127(8)   | -0.0041(8)  |
| C42  | 0.0336(10) | 0.0277(9)  | 0.0349(11) | 0.0034(8)   | 0.0155(8)   | 0.0066(8)   |
| C43  | 0.0258(9)  | 0.0322(9)  | 0.0306(10) | 0.0087(8)   | 0.0098(8)   | 0.0029(7)   |
| C44  | 0.0241(8)  | 0.0285(9)  | 0.0235(9)  | 0.0014(7)   | 0.0048(7)   | -0.0003(7)  |
| C45  | 0.0522(13) | 0.0350(11) | 0.0375(12) | -0.0101(9)  | 0.0156(10)  | -0.0070(9)  |
| C46  | 0.0250(9)  | 0.0426(11) | 0.0465(13) | 0.0115(9)   | 0.0066(9)   | 0.0059(8)   |
| C47  | 0.0247(8)  | 0.0249(8)  | 0.0218(9)  | -0.0007(7)  | 0.0031(7)   | -0.0042(7)  |
| C48  | 0.0255(9)  | 0.0254(8)  | 0.0259(9)  | -0.0010(7)  | 0.0033(7)   | -0.0008(7)  |
| C49  | 0.0265(9)  | 0.0261(8)  | 0.0224(9)  | 0.0038(7)   | 0.0026(7)   | -0.0059(7)  |
| C50  | 0.0309(9)  | 0.0292(9)  | 0.0243(9)  | -0.0027(7)  | 0.0037(7)   | -0.0073(7)  |
| C51  | 0.0290(9)  | 0.0282(9)  | 0.0282(10) | -0.0027(7)  | 0.0068(7)   | -0.0048(7)  |
| C52  | 0.0238(8)  | 0.0275(9)  | 0.0269(9)  | -0.0008(7)  | 0.0050(7)   | -0.0019(7)  |
| C53  | 0.0306(10) | 0.0291(9)  | 0.0280(10) | 0.0000(7)   | -0.0018(8)  | -0.0036(7)  |
| C54  | 0.0344(11) | 0.0413(11) | 0.0448(13) | -0.0172(10) | 0.0044(9)   | -0.0008(9)  |
| C55  | 0.025(4)   | 0.020(2)   | 0.013(3)   | -0.007(2)   | 0.004(3)    | -0.001(3)   |
| C56  | 0.037(2)   | 0.0229(18) | 0.027(2)   | -0.0039(15) | -0.0003(16) | 0.0012(18)  |
| C57  | 0.0239(18) | 0.042(2)   | 0.045(2)   | -0.0146(18) | 0.0047(16)  | 0.0031(16)  |
| C58  | 0.0327(19) | 0.042(2)   | 0.030(2)   | -0.0127(17) | 0.0128(16)  | -0.0074(16) |
| C59  | 0.037(2)   | 0.038(2)   | 0.018(2)   | -0.0051(17) | 0.0033(16)  | -0.0045(16) |
| C60  | 0.031(4)   | 0.033(3)   | 0.030(4)   | -0.003(3)   | 0.004(3)    | 0.003(3)    |
| C61A | 0.035(5)   | 0.034(3)   | 0.023(4)   | -0.007(2)   | 0.012(3)    | -0.001(4)   |
| C62A | 0.039(2)   | 0.040(2)   | 0.041(2)   | -0.0023(18) | 0.0055(18)  | 0.004(2)    |
| C63A | 0.042(2)   | 0.035(2)   | 0.046(3)   | -0.0072(18) | 0.0170(19)  | -0.0102(18) |
| C64A | 0.030(3)   | 0.036(3)   | 0.035(3)   | 0.001(2)    | 0.008(2)    | -0.010(2)   |
| C65A | 0.044(6)   | 0.037(3)   | 0.033(5)   | -0.002(3)   | 0.000(3)    | -0.009(4)   |

**Table S30.** Bond lengths and angles for [Fe(3,5-Me-BAFP)(2-MeTHF)(PhNO)].

| <b>.Atom–Atom</b> | <b>Length [Å]</b> |
|-------------------|-------------------|
| Fe1 N3            | 1.906(11)         |
| Fe1 N3            | 1.906(11)         |
| Fe1 N1            | 1.9905(14)        |
| Fe1 N1            | 1.9906(14)        |
| Fe1 N2            | 2.0143(13)        |
| Fe1 N2            | 2.0143(13)        |
| Fe1 O6A           | 2.088(10)         |
| Fe1 O6A           | 2.088(10)         |
| O1 C11            | 1.380(2)          |
| O1 C16            | 1.403(2)          |
| O2 C22            | 1.389(2)          |
| O2 C15            | 1.394(2)          |
| O3 C34            | 1.379(2)          |
| O3 C39            | 1.398(2)          |
| O4 C38            | 1.383(2)          |
| O4 C47            | 1.385(2)          |
| O5 N3             | 1.259(12)         |
| O6A C64A          | 1.436(12)         |
| O6A C61A          | 1.455(9)          |
| N1 C1             | 1.377(2)          |
| N1 C4             | 1.379(2)          |
| N2 C6             | 1.376(2)          |
| N2 C9             | 1.379(2)          |
| N3 C55            | 1.446(8)          |
| C1 C32            | 1.392(2)          |
| C1 C2             | 1.439(2)          |
| C2 C3             | 1.347(2)          |
| C3 C4             | 1.435(2)          |
| C4 C5             | 1.394(2)          |
| C5 C6             | 1.386(2)          |
| C5 C10            | 1.498(2)          |
| C6 C7             | 1.441(2)          |
| C7 C8             | 1.350(2)          |
| C8 C9             | 1.443(2)          |
| C9 C32            | 1.387(2)          |
| C10 C15           | 1.395(2)          |
| C10 C11           | 1.399(2)          |
| C11 C12           | 1.389(2)          |
| C12 C13           | 1.391(2)          |

|         |          |
|---------|----------|
| C13 C14 | 1.382(3) |
| C14 C15 | 1.389(2) |
| C16 C21 | 1.377(3) |
| C16 C17 | 1.379(3) |
| C17 C18 | 1.390(3) |
| C18 C19 | 1.392(3) |
| C18 C28 | 1.502(3) |
| C19 C20 | 1.386(3) |
| C20 C21 | 1.399(3) |
| C20 C29 | 1.504(3) |
| C22 C27 | 1.384(3) |
| C22 C23 | 1.384(3) |
| C23 C24 | 1.387(3) |
| C24 C25 | 1.391(3) |
| C24 C30 | 1.505(3) |
| C25 C26 | 1.387(3) |
| C26 C27 | 1.392(3) |
| C26 C31 | 1.511(3) |
| C32 C33 | 1.502(2) |
| C33 C34 | 1.398(2) |
| C33 C38 | 1.398(2) |
| C34 C35 | 1.392(2) |
| C35 C36 | 1.383(3) |
| C36 C37 | 1.377(3) |
| C37 C38 | 1.387(2) |
| C39 C40 | 1.383(2) |
| C39 C44 | 1.389(2) |
| C40 C41 | 1.399(3) |
| C41 C42 | 1.388(3) |
| C41 C45 | 1.507(3) |
| C42 C43 | 1.394(3) |
| C43 C44 | 1.391(3) |
| C43 C46 | 1.509(3) |
| C47 C52 | 1.388(2) |
| C47 C48 | 1.389(2) |
| C48 C49 | 1.389(2) |
| C49 C50 | 1.397(3) |
| C49 C53 | 1.505(3) |
| C50 C51 | 1.397(3) |
| C51 C52 | 1.391(3) |
| C51 C54 | 1.507(3) |
| C55 C56 | 1.394(9) |

|           |           |
|-----------|-----------|
| C55 C60   | 1.396(15) |
| C56 C57   | 1.374(6)  |
| C57 C58   | 1.371(6)  |
| C58 C59   | 1.387(6)  |
| C59 C60   | 1.400(9)  |
| C61A C65A | 1.494(17) |
| C61A C62A | 1.515(14) |
| C62A C63A | 1.551(6)  |
| C63A C64A | 1.501(7)  |

| <b>Atom-Atom-<br/>Atom</b> | <b>Angle [°]</b> |
|----------------------------|------------------|
| N3 Fe1 N3                  | 180.0            |
| N3 Fe1 N1                  | 92.6(4)          |
| N3 Fe1 N1                  | 87.4(4)          |
| N3 Fe1 N1                  | 87.4(4)          |
| N3 Fe1 N1                  | 92.6(4)          |
| N1 Fe1 N1                  | 180.0            |
| N3 Fe1 N2                  | 84.2(3)          |
| N3 Fe1 N2                  | 95.8(3)          |
| N1 Fe1 N2                  | 90.81(5)         |
| N1 Fe1 N2                  | 89.19(5)         |
| N3 Fe1 N2                  | 95.8(3)          |
| N3 Fe1 N2                  | 84.2(3)          |
| N1 Fe1 N2                  | 89.19(5)         |
| N1 Fe1 N2                  | 90.81(5)         |
| N2 Fe1 N2                  | 180.0            |
| N3 Fe1 O6A                 | 9.8(4)           |
| N3 Fe1 O6A                 | 170.2(4)         |
| N1 Fe1 O6A                 | 87.3(3)          |
| N1 Fe1 O6A                 | 92.7(3)          |
| N2 Fe1 O6A                 | 92.5(2)          |
| N2 Fe1 O6A                 | 87.5(2)          |
| N1 Fe1 O6A                 | 92.7(3)          |
| N1 Fe1 O6A                 | 87.3(3)          |
| N2 Fe1 O6A                 | 87.5(2)          |
| N2 Fe1 O6A                 | 92.5(2)          |
| O6A Fe1 O6A                | 180.0            |
| C11 O1 C16                 | 116.16(13)       |
| C22 O2 C15                 | 118.35(13)       |
| C34 O3 C39                 | 117.55(13)       |
| C38 O4 C47                 | 117.51(13)       |



|               |            |
|---------------|------------|
| C64A O6A C61A | 111.8(8)   |
| C64A O6A Fe1  | 118.7(6)   |
| C61A O6A Fe1  | 127.0(8)   |
| C1 N1 C4      | 105.47(13) |
| C1 N1 Fe1     | 127.94(10) |
| C4 N1 Fe1     | 126.58(11) |
| C6 N2 C9      | 105.73(13) |
| C6 N2 Fe1     | 126.47(11) |
| C9 N2 Fe1     | 127.74(11) |
| O5 N3 C55     | 113.9(9)   |
| O5 N3 Fe1     | 125.2(7)   |
| C55 N3 Fe1    | 120.8(8)   |
| N1 C1 C32     | 125.86(15) |
| N1 C1 C2      | 110.29(14) |
| C32 C1 C2     | 123.84(15) |
| C3 C2 C1      | 106.79(15) |
| C2 C3 C4      | 107.44(14) |
| N1 C4 C5      | 125.70(15) |
| N1 C4 C3      | 109.97(14) |
| C5 C4 C3      | 124.31(15) |
| C6 C5 C4      | 124.99(15) |
| C6 C5 C10     | 119.79(14) |
| C4 C5 C10     | 115.19(14) |
| N2 C6 C5      | 125.37(14) |
| N2 C6 C7      | 110.09(14) |
| C5 C6 C7      | 124.50(14) |
| C8 C7 C6      | 107.20(14) |
| C7 C8 C9      | 106.94(15) |
| N2 C9 C32     | 125.24(15) |
| N2 C9 C8      | 110.04(14) |
| C32 C9 C8     | 124.71(15) |
| C15 C10 C11   | 117.40(15) |
| C15 C10 C5    | 120.52(14) |
| C11 C10 C5    | 121.67(14) |
| O1 C11 C12    | 122.98(15) |
| O1 C11 C10    | 115.60(14) |
| C12 C11 C10   | 121.42(15) |
| C11 C12 C13   | 119.27(16) |
| C14 C13 C12   | 120.86(15) |
| C13 C14 C15   | 118.83(16) |
| C14 C15 O2    | 119.54(15) |
| C14 C15 C10   | 122.15(15) |

|             |            |
|-------------|------------|
| O2 C15 C10  | 118.25(14) |
| C21 C16 C17 | 122.02(17) |
| C21 C16 O1  | 118.55(17) |
| C17 C16 O1  | 119.42(17) |
| C16 C17 C18 | 119.69(18) |
| C17 C18 C19 | 118.30(19) |
| C17 C18 C28 | 121.19(19) |
| C19 C18 C28 | 120.49(19) |
| C20 C19 C18 | 122.22(18) |
| C19 C20 C21 | 118.62(17) |
| C19 C20 C29 | 121.20(17) |
| C21 C20 C29 | 120.17(18) |
| C16 C21 C20 | 119.13(18) |
| C27 C22 C23 | 120.92(17) |
| C27 C22 O2  | 115.80(16) |
| C23 C22 O2  | 123.20(16) |
| C22 C23 C24 | 119.87(17) |
| C23 C24 C25 | 119.03(18) |
| C23 C24 C30 | 119.98(18) |
| C25 C24 C30 | 120.98(18) |
| C26 C25 C24 | 121.35(19) |
| C25 C26 C27 | 118.99(19) |
| C25 C26 C31 | 120.7(2)   |
| C27 C26 C31 | 120.2(2)   |
| C22 C27 C26 | 119.81(19) |
| C9 C32 C1   | 123.83(15) |
| C9 C32 C33  | 119.89(14) |
| C1 C32 C33  | 116.11(14) |
| C34 C33 C38 | 116.80(15) |
| C34 C33 C32 | 124.11(15) |
| C38 C33 C32 | 118.92(14) |
| O3 C34 C35  | 122.15(15) |
| O3 C34 C33  | 116.51(14) |
| C35 C34 C33 | 121.25(16) |
| C36 C35 C34 | 119.73(16) |
| C37 C36 C35 | 120.84(16) |
| C36 C37 C38 | 118.66(17) |
| O4 C38 C37  | 120.49(16) |
| O4 C38 C33  | 116.75(15) |
| C37 C38 C33 | 122.71(16) |
| C40 C39 C44 | 121.54(16) |
| C40 C39 O3  | 117.38(15) |

|                |            |
|----------------|------------|
| C44 C39 O3     | 121.01(16) |
| C39 C40 C41    | 119.35(17) |
| C42 C41 C40    | 118.87(17) |
| C42 C41 C45    | 120.77(18) |
| C40 C41 C45    | 120.35(18) |
| C41 C42 C43    | 121.90(17) |
| C44 C43 C42    | 118.69(17) |
| C44 C43 C46    | 119.71(18) |
| C42 C43 C46    | 121.58(17) |
| C39 C44 C43    | 119.62(17) |
| O4 C47 C52     | 115.57(15) |
| O4 C47 C48     | 123.04(16) |
| C52 C47 C48    | 121.32(16) |
| C47 C48 C49    | 119.66(17) |
| C48 C49 C50    | 119.06(17) |
| C48 C49 C53    | 119.07(16) |
| C50 C49 C53    | 121.86(16) |
| C51 C50 C49    | 121.28(17) |
| C52 C51 C50    | 119.07(17) |
| C52 C51 C54    | 119.60(17) |
| C50 C51 C54    | 121.32(17) |
| C47 C52 C51    | 119.59(17) |
| C56 C55 C60    | 123.1(8)   |
| C56 C55 N3     | 122.7(9)   |
| C60 C55 N3     | 113.9(9)   |
| C57 C56 C55    | 116.7(5)   |
| C58 C57 C56    | 122.3(4)   |
| C57 C58 C59    | 120.4(4)   |
| C58 C59 C60    | 119.8(5)   |
| C55 C60 C59    | 117.6(8)   |
| O6A C61A C65A  | 112.0(8)   |
| O6A C61A C62A  | 102.1(8)   |
| C65A C61A C62A | 113.4(10)  |
| C61A C62A C63A | 101.3(4)   |
| C64A C63A C62A | 101.0(4)   |
| O6A C64A C63A  | 104.8(5)   |

**Table S31.** Torsion angles for [Fe(3,5-Me-BAFP)(2-MeTHF)(PhNO)].

| <b>Atom–Atom–Atom–<br/>Atom</b> | <b>Torsion Angle<br/>[°]</b> |
|---------------------------------|------------------------------|
| C4 N1 C1 C32                    | 176.96(16)                   |
| Fe1 N1 C1 C32                   | -1.6(2)                      |
| C4 N1 C1 C2                     | -1.69(18)                    |
| Fe1 N1 C1 C2                    | 179.70(11)                   |
| N1 C1 C2 C3                     | 0.68(19)                     |
| C32 C1 C2 C3                    | -178.01(16)                  |
| C1 C2 C3 C4                     | 0.61(19)                     |
| C1 N1 C4 C5                     | -176.20(16)                  |
| Fe1 N1 C4 C5                    | 2.4(2)                       |
| C1 N1 C4 C3                     | 2.06(18)                     |
| Fe1 N1 C4 C3                    | -179.30(11)                  |
| C2 C3 C4 N1                     | -1.71(19)                    |
| C2 C3 C4 C5                     | 176.58(16)                   |
| N1 C4 C5 C6                     | -3.8(3)                      |
| C3 C4 C5 C6                     | 178.15(16)                   |
| N1 C4 C5 C10                    | 174.29(15)                   |
| C3 C4 C5 C10                    | -3.7(2)                      |
| C9 N2 C6 C5                     | -177.09(15)                  |
| Fe1 N2 C6 C5                    | 0.3(2)                       |
| C9 N2 C6 C7                     | 0.66(17)                     |
| Fe1 N2 C6 C7                    | 178.03(11)                   |
| C4 C5 C6 N2                     | 2.4(3)                       |
| C10 C5 C6 N2                    | -175.67(15)                  |
| C4 C5 C6 C7                     | -175.06(16)                  |
| C10 C5 C6 C7                    | 6.9(2)                       |
| N2 C6 C7 C8                     | -1.13(19)                    |
| C5 C6 C7 C8                     | 176.64(16)                   |
| C6 C7 C8 C9                     | 1.09(19)                     |
| C6 N2 C9 C32                    | -178.83(15)                  |
| Fe1 N2 C9 C32                   | 3.8(2)                       |
| C6 N2 C9 C8                     | 0.03(17)                     |
| Fe1 N2 C9 C8                    | -177.30(11)                  |
| C7 C8 C9 N2                     | -0.73(19)                    |
| C7 C8 C9 C32                    | 178.14(16)                   |
| C6 C5 C10 C15                   | 83.5(2)                      |
| C4 C5 C10 C15                   | -94.69(18)                   |
| C6 C5 C10 C11                   | -103.96(19)                  |
| C4 C5 C10 C11                   | 77.8(2)                      |

|                  |             |
|------------------|-------------|
| C16 O1 C11 C12   | 10.2(2)     |
| C16 O1 C11 C10   | -169.62(15) |
| C15 C10 C11 O1   | -177.72(14) |
| C5 C10 C11 O1    | 9.5(2)      |
| C15 C10 C11 C12  | 2.4(2)      |
| C5 C10 C11 C12   | -170.31(15) |
| O1 C11 C12 C13   | 179.55(15)  |
| C10 C11 C12 C13  | -0.6(2)     |
| C11 C12 C13 C14  | -1.5(2)     |
| C12 C13 C14 C15  | 1.8(3)      |
| C13 C14 C15 O2   | -177.05(15) |
| C13 C14 C15 C10  | 0.2(3)      |
| C22 O2 C15 C14   | -73.9(2)    |
| C22 O2 C15 C10   | 108.79(17)  |
| C11 C10 C15 C14  | -2.2(2)     |
| C5 C10 C15 C14   | 170.61(15)  |
| C11 C10 C15 O2   | 175.03(14)  |
| C5 C10 C15 O2    | -12.1(2)    |
| C11 O1 C16 C21   | -106.55(19) |
| C11 O1 C16 C17   | 72.3(2)     |
| C21 C16 C17 C18  | 1.3(3)      |
| O1 C16 C17 C18 - | -177.57(17) |
| C16 C17 C18 C19  | -0.7(3)     |
| C16 C17 C18 C28  | 177.9(2)    |
| C17 C18 C19 C20  | -0.6(3)     |
| C28 C18 C19 C20  | -179.1(2)   |
| C18 C19 C20 C21  | 1.2(3)      |
| C18 C19 C20 C29  | -179.82(19) |
| C17 C16 C21 C20  | -0.6(3)     |
| O1 C16 C21 C20   | 178.23(16)  |
| C19 C20 C21 C16  | -0.6(3)     |
| C29 C20 C21 C16  | -179.59(18) |
| C15 O2 C22 C27   | 162.60(16)  |
| C15 O2 C22 C23   | -20.6(2)    |
| C27 C22 C23 C24  | 0.5(3)      |
| O2 C22 C23 C24   | -176.10(16) |
| C22 C23 C24 C25  | -1.5(3)     |
| C22 C23 C24 C30  | 177.15(18)  |
| C23 C24 C25 C26  | 1.9(3)      |
| C30 C24 C25 C26  | -176.8(2)   |
| C24 C25 C26 C27  | -1.2(4)     |
| C24 C25 C26 C31  | 176.7(3)    |

|                 |             |
|-----------------|-------------|
| C23 C22 C27 C26 | 0.2(3)      |
| O2 C22 C27 C26  | 177.0(2)    |
| C25 C26 C27 C22 | 0.1(4)      |
| C31 C26 C27 C22 | -177.8(3)   |
| N1 C1 C32 C9    | 3.8(3)      |
| C2 C1 C32 C9    | -177.76(16) |
| N1 C1 C32 C33   | -171.52(15) |
| C2 C1 C32 C33   | 7.0(2)      |
| C9 C32 C33 C34  | 85.3(2)     |
| C1 C32 C33 C34  | -99.24(19)  |
| C9 C32 C33 C38  | -99.53(19)  |
| C1 C32 C33 C38  | 75.94(19)   |
| C39 O3 C34 C35  | 29.5(2)     |
| C39 O3 C34 C33  | -153.80(15) |
| C38 C33 C34 O3  | -177.64(14) |
| C32 C33 C34 O3  | -2.4(2)     |
| C38 C33 C34 C35 | -0.9(2)     |
| C32 C33 C34 C35 | 174.42(15)  |
| O3 C34 C35 C36  | 176.96(15)  |
| C33 C34 C35 C36 | 0.4(2)      |
| C34 C35 C36 C37 | 0.3(3)      |
| C35 C36 C37 C38 | -0.4(3)     |
| C47 O4 C38 C37  | -53.3(2)    |
| C47 O4 C38 C33  | 129.38(16)  |
| C36 C37 C38 O4  | -177.33(15) |
| C36 C37 C38 C33 | -0.1(3)     |
| C34 C33 C38 O4  | 178.05(14)  |
| C32 C33 C38 O4  | 2.5(2)      |
| C34 C33 C38 C37 | 0.7(2)      |
| C32 C33 C38 C37 | -174.79(15) |
| C34 O3 C39 C40  | -136.18(16) |
| C34 O3 C39 C44  | 46.9(2)     |
| C44 C39 C40 C41 | 0.4(3)      |
| O3 C39 C40 C41  | -176.51(15) |
| C39 C40 C41 C42 | -1.3(3)     |
| C39 C40 C41 C45 | -179.91(17) |
| C40 C41 C42 C43 | 0.7(3)      |
| C45 C41 C42 C43 | 179.30(18)  |
| C41 C42 C43 C44 | 0.8(3)      |
| C41 C42 C43 C46 | -177.68(18) |
| C40 C39 C44 C43 | 1.1(3)      |
| O3 C39 C44 C43  | 177.91(15)  |

|                     |             |
|---------------------|-------------|
| C42 C43 C44 C39     | -1.7(3)     |
| C46 C43 C44 C39     | 176.84(17)  |
| C38 O4 C47 C52      | 160.43(16)  |
| C38 O4 C47 C48      | -22.6(2)    |
| O4 C47 C48 C49      | -177.78(16) |
| C52 C47 C48 C49     | -1.0(3)     |
| C47 C48 C49 C50     | 1.2(3)      |
| C47 C48 C49 C53     | -178.04(16) |
| C48 C49 C50 C51     | -0.3(3)     |
| C53 C49 C50 C51     | 178.88(17)  |
| C49 C50 C51 C52     | -0.8(3)     |
| C49 C50 C51 C54     | 178.18(18)  |
| O4 C47 C52 C51      | 176.89(16)  |
| C48 C47 C52 C51     | -0.1(3)     |
| C50 C51 C52 C47     | 1.0(3)      |
| C54 C51 C52 C47     | -177.97(18) |
| O5 N3 C55 C56       | -90.9(11)   |
| Fe1 N3 C55 C56      | 86.9(11)    |
| O5 N3 C55 C60       | 83.4(12)    |
| Fe1 N3 C55 C60      | -98.9(11)   |
| C60 C55 C56 C57     | -0.1(12)    |
| N3 C55 C56 C57      | 173.6(8)    |
| C55 C56 C57 C58     | 0.8(7)      |
| C56 C57 C58 C59     | 0.0(6)      |
| C57 C58 C59 C60     | -1.6(8)     |
| C56 C55 C60 C59     | -1.4(15)    |
| N3 C55 C60 C59      | -175.6(9)   |
| C58 C59 C60 C55     | 2.2(13)     |
| C64A O6A C61A C65A  | 103.0(11)   |
| Fe1 O6A C61A C65A   | -95.2(12)   |
| C64A O6A C61A C62A  | -18.6(11)   |
| Fe1 O6A C61A C62A   | 143.1(8)    |
| O6A C61A C62A C63A  | 37.4(9)     |
| C65A C61A C62A C63A | -83.2(7)    |
| C61A C62A C63A C64A | -43.0(7)    |
| C61A O6A C64A C63A  | -9.0(10)    |
| Fe1 O6A C64A C63A   | -172.5(5)   |
| C62A C63A C64A O6A  | 32.0(6)     |

## References

- (1) Sheldrick, G. M. In *SHELXTL*; v. 2008/4 ed.; Bruker Analytical X-ray: Madison, WI, 2008.
- (2) Bruker Madison (WI), U. **2019**.
- (3) Krause, L.; Herbst-Irmer, R.; Sheldrick, G. M.; Stalke, D. Comparison of silver and molybdenum microfocus X-ray sources for single-crystal structure determination. *J. Appl. Cryst.* **2015**, *48* (1), 3-10.
- (4) In Bruker Advanced X-ray Solutions, Bruker Inc. *Madison, Wisconsin: USA 2000-2003*.
- (5) Sheldrick, G. M. A short history of SHELX. *Acta Crystallogr. A* **2008**, *64* (1), 112-122.
- (6) Sheldrick, G. M. SHELXT—Integrated space-group and crystal-structure determination. *Acta Crystallogr. A* **2015**, *71* (1), 3-8.
- (7) Sheldrick, G. M. Crystal structure refinement with SHELXL. *Acta Crystallogr. Sect. C: Struct. Chem.* **2015**, *71* (1), 3-8.
- (8) Sheldrick, G. M. U.o.G. *Germany 2018*.
- (9) Hübschle, C. B.; Sheldrick, G. M.; Dittrich, B. ShelXle: a Qt graphical user interface for SHELXL. *J. Appl. Cryst.* **2011**, *44* (6), 1281-1284.
